# Supplementary material for: Skeletal dysplasia-causing TRPV4 mutations suppress the hypertrophic differentiation of human iPSC-derived chondrocytes
Source: bioRxiv preprint, doi:10.1101/2021.06.15.448562, version 1 (2021-06-15)
Supplement: Supplemental Table [file 448562_file02.xlsx]

## Sheet: Cluster 1
Ensembl Gene ID	Symbol	WT_TGFβ3	WT_BMP4	V620I_TGFβ3	V620I_BMP4	T89I_TGFβ3	T89I_BMP4
ENSG00000000971	CFH	-1.16339	0.35028	-0.943248	1.05457	-0.543184	1.34555
ENSG00000003096	KLHL13	0.020728	1.90299	-0.800825	-0.229429	-0.874367	-0.292403
ENSG00000003989	SLC7A2	-0.783561	1.85305	-0.566759	0.24685	-0.754699	-0.1821
ENSG00000004799	PDK4	-0.805349	1.80167	-0.813629	-0.235873	-0.602252	0.602695
ENSG00000004864	SLC25A13	-1.2228	1.0366	-0.968659	0.339482	-0.288503	1.14895
ENSG00000006534	ALDH3B1	-1.23965	1.43699	-1.11279	0.4581	-0.156424	0.44743
ENSG00000006740	ARHGAP44	-0.215109	1.94086	-0.605795	-0.0068875	-0.878406	-0.514814
ENSG00000006747	SCIN	-0.861723	1.77036	-0.932235	0.0217829	-0.546456	0.420279
ENSG00000007944	MYLIP	-1.10933	1.6966	-0.615149	-0.125511	-0.27649	0.368125
ENSG00000008323	PLEKHG6	-0.994809	1.29674	-0.650162	0.7228	-0.674076	0.182618
ENSG00000008394	MGST1	-0.156139	1.92246	-0.492437	-0.637315	-0.57501	-0.246218
ENSG00000010278	CD9	-1.52264	0.644517	-0.63248	0.552631	-0.213808	1.35155
ENSG00000010704	HFE	-1.5119	0.853164	-0.0084931	0.501746	-0.515858	0.905626
ENSG00000013297	CLDN11	-0.51388	1.88031	-0.600994	-0.251556	-0.622529	-0.0554664
ENSG00000015413	DPEP1	-0.194299	1.87735	-0.422659	-0.469151	-0.424026	-0.630508
ENSG00000019991	HGF	-0.535966	1.53183	-1.07135	0.0507113	-0.487878	0.326418
ENSG00000023697	DERA	-1.2589	1.49171	-0.81232	-0.281959	0.13656	0.695771
ENSG00000029559	IBSP	-0.477511	2.01251	-0.480236	-0.365916	-0.48123	-0.436899
ENSG00000031081	ARHGAP31	-1.1834	1.25706	-1.06117	0.189714	-0.296798	1.10572
ENSG00000035664	DAPK2	-0.416314	1.96756	-0.698208	-0.0748495	-0.630128	-0.430143
ENSG00000036448	MYOM2	-0.447514	1.8008	-0.807868	0.288791	-0.883386	-0.203721
ENSG00000036672	USP2	0.0758487	1.89969	-0.505863	-0.421155	-0.719132	-0.607812
ENSG00000042062	RIPOR3	-0.596869	1.94437	-0.73835	0.070815	-0.774623	-0.119905
ENSG00000047648	ARHGAP6	-0.424619	1.54155	-0.79693	-0.0692314	-1.00155	0.735391
ENSG00000049089	COL9A2	-1.1645	1.12969	-0.964293	0.713092	-0.621605	0.888718
ENSG00000050628	PTGER3	-1.36872	0.385319	-0.600008	1.22891	-0.469413	0.898558
ENSG00000050767	COL23A1	0.0358249	0.668876	-0.842885	0.684702	-1.43127	0.898708
ENSG00000051523	CYBA	-1.16551	1.30642	-0.748316	0.755008	-0.588388	0.338277
ENSG00000052850	ALX4	-0.659404	1.26689	-0.754593	0.960549	-0.706133	-0.394604
ENSG00000053328	METTL24	-0.651283	1.19439	-0.756518	0.490118	-0.481287	0.0206056
ENSG00000055813	CCDC85A	-0.0649341	1.92572	-0.682397	-0.0996751	-0.913309	-0.448011
ENSG00000059377	TBXAS1	-0.475517	1.1468	-0.928989	0.0919289	-0.628291	0.749099
ENSG00000061455	PRDM6	-0.376276	1.43932	-1.37705	-0.407851	-0.268392	0.861311
ENSG00000062282	DGAT2	0.773612	1.31605	-0.791515	0.224263	-1.26831	-0.60264
ENSG00000062524	LTK	-1.02736	0.985905	-0.775241	1.25656	-0.897594	0.351892
ENSG00000064195	DLX3	-0.744301	1.89615	-0.697263	0.23264	-0.734803	-0.168991
ENSG00000064205	CCN5	-0.444111	0.538103	-0.900755	0.546719	-0.986914	1.36236
ENSG00000064655	EYA2	-0.231764	2.00209	-0.611662	-0.367732	-0.594132	-0.466288
ENSG00000065054	SLC9A3R2	-0.990514	1.62349	-0.885663	0.330552	-0.550259	0.334643
ENSG00000065361	ERBB3	-0.899231	1.61325	0.11104	0.0618467	-0.863236	0.00545385
ENSG00000065534	MYLK	-1.2773	1.49013	-0.502011	0.540339	-0.413698	0.0493802
ENSG00000065882	TBC1D1	-1.16521	1.08804	-0.995807	0.736916	-0.62728	0.952521
ENSG00000066185	ZMYND12	-0.460971	1.2986	-0.354067	1.00389	-0.946369	-0.839465
ENSG00000066629	EML1	-1.26685	0.948393	-0.963438	0.67274	-0.469932	1.11764
ENSG00000068078	FGFR3	-0.917316	1.19503	-0.971323	0.739558	-0.943165	0.872516
ENSG00000068976	PYGM	-0.414616	1.47988	-1.21716	0.541721	-0.657895	-0.0482998
ENSG00000070159	PTPN3	-0.922985	1.69586	-0.794377	0.230072	-0.759139	0.469301
ENSG00000070214	SLC44A1	-1.04064	1.61665	-0.740358	-0.0033609	-0.384227	0.489123
ENSG00000070371	CLTCL1	-0.0911773	1.96325	-0.681821	-0.261787	-0.769598	-0.439094
ENSG00000070731	ST6GALNAC2	-0.616441	1.93493	-0.763546	0.0563034	-0.662353	-0.186372
ENSG00000070759	TESK2	-1.00172	1.55957	-0.824097	0.28862	-0.631158	0.537024
ENSG00000072133	RPS6KA6	-0.643075	1.2646	-0.648795	0.675761	-1.10011	0.385892
ENSG00000074276	CDHR2	0.64017	1.17274	-0.866273	0.648342	-1.34844	-0.617469
ENSG00000075035	WSCD2	-0.886473	1.42647	-0.91401	0.772236	-0.935882	0.41221
ENSG00000075651	PLD1	-1.15545	1.42773	-0.731627	0.239902	-0.278901	0.42058
ENSG00000076258	FMO4	-1.19722	0.846422	-0.872935	0.598312	-0.433302	1.12065
ENSG00000077943	ITGA8	-0.763422	1.77587	-0.770938	0.443845	-0.79207	-0.114691
ENSG00000078269	SYNJ2	-1.1877	0.995123	0.0909816	0.907528	-0.0540032	-0.97224
ENSG00000078401	EDN1	-1.21849	1.01466	0.0620887	0.628239	-0.683792	0.283756
ENSG00000079393	DUSP13	-0.0982876	1.82618	-0.487507	-0.119911	-0.876725	-0.487507
ENSG00000079689	SCGN	-0.479799	1.18942	-0.955401	0.704587	-0.992341	0.392907
ENSG00000080546	SESN1	-0.983906	1.67746	-0.644465	0.176789	-0.84341	0.608553
ENSG00000081189	MEF2C	-0.793686	1.84158	-0.794681	0.185561	-0.742368	0.1399
ENSG00000081923	ATP8B1	-1.31274	0.582624	-0.215761	0.928633	-0.689922	0.870965
ENSG00000082196	C1QTNF3	-0.831758	0.457878	-1.15623	0.665703	-0.550352	1.50093
ENSG00000082556	OPRK1	0.625311	1.58187	-0.0207865	-0.721425	-0.762331	-0.943783
ENSG00000083123	BCKDHB	-1.21335	1.46205	-0.671403	-0.109694	-0.14298	0.676698
ENSG00000084674	APOB	-0.755305	1.83199	-0.688392	-0.437468	-0.26461	0.188911
ENSG00000085741	WNT11	-0.648345	1.84738	-0.570154	0.431894	-0.813451	-0.519817
ENSG00000085871	MGST2	-1.15662	1.00416	-0.857403	0.227463	-0.441732	1.34637
ENSG00000086289	EPDR1	-0.515119	1.90588	-0.421911	-0.0743715	-0.726138	-0.365085
ENSG00000089041	P2RX7	-0.698237	1.08387	-0.372869	1.09434	-1.03843	-0.215855
ENSG00000089123	TASP1	-1.11044	0.83169	-0.846557	0.604655	-0.666573	1.30078
ENSG00000089356	FXYD3	-0.899473	1.27146	-0.900298	0.875394	-0.926702	0.472728
ENSG00000090530	P3H2	-1.19893	1.6657	-0.717958	-0.190964	0.324808	-0.0828569
ENSG00000090776	EFNB1	-0.373737	1.28065	-0.540807	0.827366	-1.37915	0.0672998
ENSG00000091513	TF	-0.694289	1.83295	-0.723194	0.246906	-0.734717	-0.144603
ENSG00000091879	ANGPT2	-0.535246	1.23451	-0.915331	-0.154735	-0.902988	1.39327
ENSG00000091986	CCDC80	-0.781993	1.87221	-0.799182	0.181472	-0.633844	-0.0512797
ENSG00000092758	COL9A3	-1.17529	0.559557	-0.974088	1.00802	-0.606667	1.25994
ENSG00000092969	TGFB2	-1.20131	1.35686	0.233977	0.577551	-0.501283	-0.543073
ENSG00000093167	LRRFIP2	-0.84621	1.83292	-0.731117	-0.0665072	-0.561941	0.253438
ENSG00000095015	MAP3K1	-0.705693	1.49777	-0.519451	0.577037	-1.05632	0.102398
ENSG00000095637	SORBS1	-1.03056	0.202845	-0.145112	0.841764	-1.00428	1.46542
ENSG00000095739	BAMBI	-1.12846	0.872066	-0.878096	0.765668	-0.793592	1.25719
ENSG00000096060	FKBP5	-0.67011	1.66587	-0.932244	-0.613296	-0.37673	0.924594
ENSG00000097096	SYDE2	-1.06905	1.20067	0.0481412	0.718553	-0.878818	-0.0099451
ENSG00000100033	PRODH	-0.342878	1.47011	0.299221	-0.148629	-1.15225	-0.0676926
ENSG00000100146	SOX10	-0.520811	1.50986	-0.242882	0.00366768	-0.426673	-0.511845
ENSG00000100314	CABP7	-0.752209	1.4246	-0.888449	0.0682575	-0.888449	1.08552
ENSG00000100558	PLEK2	-0.186655	1.5549	-0.699956	0.308314	-1.0116	-0.186655
ENSG00000100600	LGMN	-1.45071	1.15665	-0.850889	0.63286	-0.129421	0.571719
ENSG00000100678	SLC8A3	0.0689102	1.93841	-0.50246	-0.368642	-0.727399	-0.712579
ENSG00000100767	PAPLN	-0.648385	1.70742	-0.773601	0.501205	-0.623216	-0.475769
ENSG00000101017	CD40	-0.240629	1.40521	0.110031	0.370199	-0.987198	-0.840147
ENSG00000101076	HNF4A	-0.597736	1.44363	-0.399929	0.114368	-0.597736	-0.0834385
ENSG00000101276	SLC52A3	-0.861453	0.770658	-0.690935	1.18478	-0.958893	0.510819
ENSG00000101280	ANGPT4	-0.530245	2.01696	-0.54282	-0.135052	-0.603895	-0.454201
ENSG00000101336	HCK	-0.137917	1.03602	-1.0289	0.602565	-0.679733	-0.0656747
ENSG00000101342	TLDC2	-0.869452	1.47855	-0.675439	-0.0030064	-0.796697	0.929581
ENSG00000101347	SAMHD1	-0.858026	1.53521	-0.798392	0.0170058	-0.805998	0.947475
ENSG00000101400	SNTA1	-0.950611	1.64746	-0.83384	0.412278	-0.617285	0.178051
ENSG00000101439	CST3	-0.963514	1.72293	-0.816983	0.00877302	-0.405427	0.333297
ENSG00000101605	MYOM1	-0.444586	1.59983	-0.498412	0.538694	-1.07031	-0.33309
ENSG00000101665	SMAD7	-1.47076	0.952276	-0.648792	0.985709	-0.413372	0.576991
ENSG00000102048	ASB9	-0.860981	0.665731	-0.766101	0.38109	-0.304637	0.924496
ENSG00000102554	KLF5	-0.937545	0.158601	-0.712942	0.545953	-0.705844	1.96472
ENSG00000102683	SGCG	-0.941003	1.15258	-0.920419	0.947401	-0.891203	0.56339
ENSG00000102743	SLC25A15	-0.893079	1.65407	-0.637155	-0.0527604	-0.758064	0.703594
ENSG00000102760	RGCC	-1.1217	1.54857	-1.12715	-0.0183588	-0.0653245	0.669568
ENSG00000103056	SMPD3	-0.197482	2.02602	-0.567104	-0.290309	-0.639641	-0.631016
ENSG00000103876	FAH	-0.329328	1.88232	-1.01824	-0.271738	-0.536932	0.0258114
ENSG00000104043	ATP8B4	0.0622158	1.78582	-0.48134	-0.588361	-0.478524	-0.560198
ENSG00000104044	OCA2	-0.93901	0.733937	-0.888076	0.711883	-0.776756	1.248
ENSG00000104081	BMF	-1.08896	1.76282	0.28599	-0.104723	-0.363276	-0.560475
ENSG00000104267	CA2	-1.19456	1.45162	-0.487984	-0.0508694	0.568494	-0.544937
ENSG00000104369	JPH1	-1.05498	1.343	-0.803698	0.434111	-0.812034	0.923567
ENSG00000104918	RETN	-0.272939	1.77865	-0.331318	0.139881	-0.873406	-0.69827
ENSG00000105227	PRX	-0.650184	1.42345	-0.929513	0.728682	-1.09051	0.380927
ENSG00000105392	CRX	-0.823452	1.71302	-0.413517	-0.0962127	-0.516001	0.0437167
ENSG00000105519	CAPS	-0.984142	0.0244992	-1.11889	1.11438	-0.279003	1.28458
ENSG00000105523	FAM83E	0.275973	1.15395	-1.33116	0.528948	-0.721047	-0.319263
ENSG00000105852	PON3	-0.577142	1.61685	-0.857226	-0.4371	-0.600483	0.854397
ENSG00000105880	DLX5	-0.438168	1.82994	-0.596594	0.265645	-0.793668	-0.555071
ENSG00000105889	STEAP1B	-0.952681	0.680487	-0.708343	-0.0811809	0.0382028	1.12857
ENSG00000106049	HIBADH	-1.57729	1.15172	-0.578599	0.563932	-0.0926635	0.517671
ENSG00000106617	PRKAG2	-0.562101	1.76689	-0.440776	0.00842441	-1.03326	0.200833
ENSG00000106772	PRUNE2	-0.366988	1.42812	-0.0737696	-0.313715	-1.31057	0.824639
ENSG00000107438	PDLIM1	-1.38371	1.62888	0.0209357	0.0636456	-0.0460336	-0.371313
ENSG00000107485	GATA3	-0.339532	1.70009	-1.20717	-0.224737	-0.529078	0.398184
ENSG00000107611	CUBN	-0.467747	0.612661	-1.02077	0.290045	-0.677804	1.34456
ENSG00000107738	VSIR	-1.00354	1.53903	-1.00313	0.672877	-0.527457	0.0952345
ENSG00000107859	PITX3	-0.705369	1.57848	-0.811412	0.510228	-0.624999	-0.199707
ENSG00000108179	PPIF	-0.879922	0.95383	-0.967764	0.396177	-0.883065	1.5184
ENSG00000108381	ASPA	-0.745638	1.77322	-0.761381	0.0100182	-0.682667	0.288142
ENSG00000108387	SEPTIN4	-0.178542	1.83583	-0.649056	0.134099	-1.09994	-0.272871
ENSG00000108813	DLX4	-0.564489	1.67283	-0.39696	0.229922	-0.726613	-0.418576
ENSG00000108932	SLC16A6	-0.333124	1.36859	-0.518422	0.733285	-0.866328	-0.684812
ENSG00000109846	CRYAB	-1.01251	1.63115	-0.731135	0.291504	-0.675405	0.418148
ENSG00000109906	ZBTB16	-0.80412	1.26689	-1.1878	0.0907807	-0.637081	1.29917
ENSG00000110665	C11orf21	-0.162863	1.48969	-0.535352	-0.278158	-0.795504	0.197801
ENSG00000110693	SOX6	0.0219534	1.25783	-1.12654	-0.0446505	-1.16017	1.0266
ENSG00000110799	VWF	-1.04799	0.708392	-0.731942	1.27313	-0.835563	0.601317
ENSG00000111077	TNS2	-1.25396	0.676543	-1.14721	0.389339	-0.0384382	1.44924
ENSG00000111087	GLI1	-0.454496	1.85371	-0.629712	0.215415	-0.829248	-0.417463
ENSG00000111249	CUX2	-0.377344	1.753	-0.612483	0.355782	-0.829149	-0.590565
ENSG00000111319	SCNN1A	-0.76609	1.80529	-0.82188	0.00249402	-0.729936	0.40621
ENSG00000111321	LTBR	-1.35963	0.7629	-1.00989	0.421738	-0.174664	1.4761
ENSG00000111341	MGP	-0.992508	1.09279	-1.28848	0.454855	0.20566	0.274081
ENSG00000111404	RERGL	-0.179043	1.8467	-0.560433	-0.572938	-0.535424	-0.185295
ENSG00000111907	TPD52L1	-0.956341	1.20597	-1.01531	0.797804	-0.87279	0.782458
ENSG00000112164	GLP1R	-0.377257	1.945	-0.501615	0.0796348	-0.802922	-0.624329
ENSG00000112195	TREML2	-0.326671	0.871124	-1.15016	0.534244	-0.888138	0.896078
ENSG00000112245	PTP4A1	-0.286544	1.92992	0.159382	-0.458472	-0.816965	-0.649962
ENSG00000112343	TRIM38	-1.26818	1.00963	-0.730228	0.456103	-0.550438	1.20075
ENSG00000112394	SLC16A10	-1.04168	1.24726	-0.200795	-0.0174967	0.566768	-0.805681
ENSG00000112769	LAMA4	-0.802108	1.77551	-0.625493	0.1778	-0.720182	0.0508046
ENSG00000112964	GHR	-0.796296	1.7685	-0.886928	-0.0751132	-0.656389	0.565997
ENSG00000113196	HAND1	-0.339134	1.41849	-0.841312	0.0913052	-0.966857	0.569571
ENSG00000113231	PDE8B	-0.384271	1.88733	-0.819127	-0.112179	-0.881389	0.139812
ENSG00000113594	LIFR	-0.0971616	1.39881	-0.288366	0.169115	-1.55802	0.4047
ENSG00000113805	CNTN3	-0.955422	1.38601	-0.311974	0.508421	-0.937549	0.310025
ENSG00000114251	WNT5A	-0.842417	1.48589	0.279544	0.31091	-0.53181	-0.842972
ENSG00000114547	ROPN1B	-0.426716	1.63484	-0.855497	0.408129	-0.801545	-0.230783
ENSG00000114790	ARHGEF26	-1.38381	0.703447	-0.240142	0.364335	-0.549635	1.39436
ENSG00000114812	VIPR1	-0.286663	1.50616	-1.17251	-0.0099572	-0.995722	0.887415
ENSG00000114850	SSR3	-1.22953	0.994855	-0.55695	0.627566	-0.75557	1.04053
ENSG00000114854	TNNC1	-1.12746	0.807928	-0.957473	0.915942	-0.259812	0.508678
ENSG00000115041	KCNIP3	-0.235299	1.71387	-0.914329	0.254175	-1.07271	0.0342755
ENSG00000115290	GRB14	-0.523242	1.73007	-0.236303	-0.227863	-0.717347	-0.112525
ENSG00000115355	CCDC88A	-0.851804	1.54614	-0.480902	-0.104125	-0.837286	0.81034
ENSG00000115361	ACADL	-0.69223	1.75063	-0.802329	-0.222279	-0.718831	0.645947
ENSG00000115380	EFEMP1	-0.965468	1.44471	-1.03889	0.575406	-0.594934	0.425941
ENSG00000115468	EFHD1	-0.662152	1.95205	-0.682134	0.0278368	-0.729299	-0.102442
ENSG00000115648	MLPH	-0.280601	1.33747	-0.835979	0.41896	-1.11901	0.360218
ENSG00000115738	ID2	-0.912243	1.40261	-1.00293	0.692803	-0.740207	0.41232
ENSG00000115919	KYNU	-0.697709	1.79579	-0.384672	0.209018	-0.7139	-0.406261
ENSG00000116039	ATP6V1B1	-0.520423	1.71134	-0.44485	0.188074	-0.619613	-0.567656
ENSG00000116132	PRRX1	-1.23217	0.602334	-0.394325	0.905243	-0.469472	0.653077
ENSG00000116183	PAPPA2	-0.321332	1.68378	-0.429514	-0.416125	-0.838677	0.285986
ENSG00000116704	SLC35D1	-1.19214	0.929817	-0.947345	0.581172	-0.57368	1.28712
ENSG00000116761	CTH	-0.271866	1.39981	-0.442885	0.624829	-1.47978	0.0789031
ENSG00000116791	CRYZ	-0.420514	1.86779	-0.676586	-0.453204	-0.469549	-0.022784
ENSG00000116962	NID1	-0.927627	1.62875	-0.587932	0.585473	-0.907926	0.0830336
ENSG00000117152	RGS4	-0.697797	1.24357	-0.781802	0.861277	-0.761869	-0.0784391
ENSG00000117318	ID3	-0.959102	1.05551	-0.891943	0.401738	-0.850534	1.3618
ENSG00000117595	IRF6	-0.51963	1.942	-0.674003	0.0308669	-0.710619	-0.316159
ENSG00000117984	CTSD	-1.05905	1.43492	-1.10225	-0.0312923	0.200435	0.375559
ENSG00000118137	APOA1	-0.573188	1.77945	-0.353608	-0.196766	-0.443793	-0.400661
ENSG00000118777	ABCG2	0.0697579	0.853081	-0.39917	0.885053	-1.35301	-0.207336
ENSG00000118785	SPP1	-0.19082	2.01113	-0.563748	-0.36487	-0.561721	-0.627881
ENSG00000119042	SATB2	-0.441899	1.94953	-0.550953	-0.376193	-0.487072	-0.308205
ENSG00000119121	TRPM6	-0.872862	0.071546	-0.739155	1.04642	-0.908404	1.62356
ENSG00000119138	KLF9	-0.245227	1.88506	-0.720072	-0.523503	-0.734874	0.211461
ENSG00000119139	TJP2	-0.953107	1.54582	-0.905731	0.524656	-0.808686	0.49416
ENSG00000119686	FLVCR2	-0.943688	1.59009	-0.982708	0.0645374	-0.479225	0.673752
ENSG00000119711	ALDH6A1	-0.803085	1.21689	-0.587703	0.714358	-1.23122	0.725115
ENSG00000119938	PPP1R3C	-1.28416	0.69543	-1.11621	0.713344	-0.312376	1.36655
ENSG00000119979	DENND10	-1.04284	1.4319	-0.972695	0.59686	-0.593828	0.449907
ENSG00000120149	MSX2	-0.841118	1.75855	-0.608384	0.416045	-0.584096	-0.390789
ENSG00000120162	MOB3B	-0.444153	1.61468	0.0308439	0.231329	-1.39492	-0.0400971
ENSG00000120690	ELF1	-1.08153	1.36005	-0.959978	-0.112413	-0.233415	1.04972
ENSG00000120693	SMAD9	-1.08179	1.11056	-0.831132	0.77862	-0.886508	0.936632
ENSG00000121005	CRISPLD1	-1.07338	1.54184	-0.246468	0.553723	-0.776232	-0.0814616
ENSG00000121068	TBX2	-0.574446	1.99039	-0.612886	-0.186786	-0.617177	-0.203089
ENSG00000121104	FAM117A	-0.74023	0.841664	-0.694443	0.714437	-1.19397	1.19857
ENSG00000121236	TRIM6	-1.0755	0.451533	-0.63614	0.805161	-0.352166	0.864099
ENSG00000121895	TMEM156	-0.186342	1.73117	-0.693271	-0.235933	-0.63266	-0.208382
ENSG00000122121	XPNPEP2	-0.710758	1.2512	-0.504236	0.705394	-0.902529	0.0464898
ENSG00000122585	NPY	-0.716874	1.8672	-0.565354	-0.0449169	-0.450067	-0.308429
ENSG00000122756	CNTFR	0.611798	1.18271	-0.571308	0.532588	-1.46778	-0.574441
ENSG00000122986	HVCN1	-0.587921	1.60731	-1.05068	-0.228424	-0.450241	0.596381
ENSG00000123104	ITPR2	-1.14622	1.02005	-0.940204	0.493923	-0.561206	1.19814
ENSG00000123500	COL10A1	-0.439068	1.99702	-0.473286	-0.401686	-0.470422	-0.44117
ENSG00000123989	CHPF	-0.710697	0.22367	-0.987055	1.14151	-0.842015	1.23709
ENSG00000124107	SLPI	-1.04608	1.17765	-0.78859	1.10431	-0.819225	0.233052
ENSG00000124159	MATN4	-1.20071	0.76859	-0.771148	1.26997	-0.600344	0.454471
ENSG00000124205	EDN3	-0.911617	1.52968	-0.930541	0.291291	-0.649035	0.583443
ENSG00000124216	SNAI1	-0.993573	0.496588	-0.903271	0.854525	-0.835831	1.54099
ENSG00000124249	KCNK15	-1.61628	0.0920524	0.156244	0.899629	-0.11916	0.835437
ENSG00000124302	CHST8	0.0306041	1.83556	-0.186852	-0.190022	-0.946999	-0.785333
ENSG00000124749	COL21A1	-0.598308	0.462027	-0.761767	0.0254183	-0.589705	1.69586
ENSG00000124772	CPNE5	-0.356088	1.89417	-0.819659	0.118676	-0.846967	-0.260061
ENSG00000124813	RUNX2	-0.381758	1.98607	-0.604037	-0.124167	-0.715334	-0.415704
ENSG00000125144	MT1G	-0.456738	1.64673	-0.698864	0.228025	-0.547536	-0.461782
ENSG00000125363	AMELX	-0.442535	1.89643	-0.490027	-0.418789	-0.442535	-0.300061
ENSG00000125430	HS3ST3B1	-1.03218	0.903726	-1.09126	0.687823	-0.69308	1.26954
ENSG00000125675	GRIA3	-1.16242	0.287609	-1.0609	1.06187	-0.300281	1.21187
ENSG00000125731	SH2D3A	-1.10685	0.230308	-0.535499	1.1283	-0.700458	1.13376
ENSG00000125798	FOXA2	-0.51237	1.94104	-0.752859	-0.120939	-0.75196	0.0118343
ENSG00000125816	NKX2-4	0.153271	1.86224	-0.633521	-0.475141	-0.666729	-0.53134
ENSG00000125999	BPIFB1	-0.838594	1.23572	-0.776776	0.768659	-0.797382	0.285567
ENSG00000126562	WNK4	-0.845294	1.73018	-0.911799	-0.241684	-0.366254	0.542538
ENSG00000126838	PZP	-1.206	0.396639	-1.16893	1.1415	-0.142631	0.916247
ENSG00000127324	TSPAN8	-0.118419	1.66152	-0.463403	-0.506526	-0.354852	-0.445559
ENSG00000127743	IL17B	-0.49125	1.95673	-0.604124	-0.174377	-0.581871	-0.341523
ENSG00000128283	CDC42EP1	-0.920677	1.77263	-0.85796	-0.0532793	-0.175024	0.0264252
ENSG00000128578	STRIP2	-1.13906	1.22737	-0.745469	0.857095	-0.598077	0.282363
ENSG00000128655	PDE11A	-1.3134	0.953752	-0.349837	0.384693	0.454312	-0.289299
ENSG00000129353	SLC44A2	-0.704191	1.93599	-0.727157	0.10803	-0.682396	-0.149417
ENSG00000129354	AP1M2	-0.38775	1.53395	-0.747093	0.0497115	-0.38775	-0.330463
ENSG00000129757	CDKN1C	-0.70069	1.38876	-0.869207	0.559787	-1.04308	0.596174
ENSG00000129910	CDH15	-0.537808	2.01245	-0.565335	-0.0659122	-0.621738	-0.483989
ENSG00000130038	CRACR2A	-0.820924	1.3072	-0.964716	0.0418305	-0.346409	0.722448
ENSG00000130147	SH3BP4	-0.790711	1.72755	-0.782639	0.170814	-0.632156	0.148636
ENSG00000130487	KLHDC7B	0.0666304	1.32116	-0.68429	0.394877	-1.14743	-0.162692
ENSG00000130528	HRC	-0.707684	1.50147	-0.694953	0.748865	-0.953467	-0.0906209
ENSG00000130700	GATA5	-0.610352	1.28436	-0.230494	0.845007	-0.953597	-0.523397
ENSG00000130751	NPAS1	0.326302	0.670715	-0.620271	1.005	-1.54433	0.0100275
ENSG00000130876	SLC7A10	-0.173137	1.77566	-0.534174	0.310036	-0.905949	-0.807972
ENSG00000130956	HABP4	-0.537256	0.636082	-0.350255	0.741219	-1.4112	1.1118
ENSG00000131149	GSE1	0.247168	1.41532	-0.825104	0.474219	-1.41643	-0.135264
ENSG00000131459	GFPT2	-1.13821	0.810342	-1.09846	0.429053	-0.273956	1.32882
ENSG00000131634	TMEM204	-0.499244	1.71702	-0.677082	0.276536	-1.04281	0.075084
ENSG00000131781	FMO5	-1.31438	1.43197	-0.908826	0.37477	-0.192217	0.508642
ENSG00000131831	RAI2	-0.886345	0.66463	-0.715596	0.479651	-0.874962	1.5383
ENSG00000132031	MATN3	-0.636014	1.75157	-0.94521	0.364438	-0.870319	0.132314
ENSG00000132170	PPARG	-0.538104	0.932735	-0.748053	0.338673	-1.18585	1.35144
ENSG00000132205	EMILIN2	-1.26317	0.644739	-0.219609	1.36161	-0.792729	0.285683
ENSG00000132329	RAMP1	-0.791454	1.70141	-0.988545	0.109049	-0.716696	0.585466
ENSG00000132357	CARD6	-0.947172	0.510865	-1.09095	0.0430784	-0.0844999	1.72792
ENSG00000133135	RNF128	-0.513911	1.61025	-0.799417	0.308346	-0.93646	0.17511
ENSG00000133195	SLC39A11	-0.663753	1.93442	-0.601576	-0.191157	-0.490492	-0.183784
ENSG00000133561	GIMAP6	-0.508951	1.79811	-0.631994	-0.247484	-0.616614	0.0652501
ENSG00000133687	TMTC1	-0.767905	1.82854	-0.806983	0.18668	-0.669105	0.036032
ENSG00000133710	SPINK5	0.0860281	1.86036	-0.526646	-0.523613	-0.714695	-0.417457
ENSG00000134215	VAV3	-0.432264	2.0375	-0.503376	-0.389187	-0.488675	-0.466452
ENSG00000134258	VTCN1	-0.206194	1.62485	-0.489712	0.124576	-0.725976	-0.599968
ENSG00000134308	YWHAQ	-0.884505	0.960637	-1.12897	0.4354	-0.666018	1.33495
ENSG00000134463	ECHDC3	0.231322	1.94078	-0.684538	-0.593935	-0.636508	-0.571011
ENSG00000134516	DOCK2	-0.756794	1.54938	-1.18803	0.185363	-0.545863	0.611913
ENSG00000134602	STK26	-1.03624	0.479409	-0.831158	0.536422	-0.657794	1.73542
ENSG00000134716	CYP2J2	-0.959525	0.531062	-0.93823	1.34024	-0.625917	0.557088
ENSG00000134802	SLC43A3	-1.16104	0.693912	-0.918386	0.453286	-0.302098	1.33964
ENSG00000134830	C5AR2	-0.827167	1.85291	-0.867557	-0.181106	0.104197	-0.397561
ENSG00000135111	TBX3	-0.217674	1.96808	-0.571937	-0.293103	-0.639909	-0.517922
ENSG00000135218	CD36	-0.616757	1.32006	-0.646929	0.792236	-0.887214	-0.164178
ENSG00000135378	PRRG4	-0.682576	0.99364	-0.876519	0.439519	-0.807254	0.952081
ENSG00000135480	KRT7	-1.00673	0.196934	-0.616872	1.16816	-0.881068	1.31381
ENSG00000135547	HEY2	-0.298801	1.84892	-0.854186	0.351008	-0.914274	-0.461611
ENSG00000135678	CPM	-0.662986	1.24998	-0.977075	0.929922	-1.10447	0.427145
ENSG00000135919	SERPINE2	-1.18489	1.43713	-0.0578908	0.605362	-0.549777	-0.35254
ENSG00000135929	CYP27A1	-1.27673	1.29902	-0.508708	0.6522	-0.605295	0.416446
ENSG00000135932	CAB39	-1.00766	1.22787	-0.84535	0.559871	-0.874668	0.971467
ENSG00000136153	LMO7	-1.06781	1.60034	-0.68943	-0.0204413	-0.0939994	0.131969
ENSG00000136261	BZW2	-0.73233	1.76802	-0.729137	0.249343	-0.910623	0.229918
ENSG00000136457	CHAD	-0.653934	1.88783	-0.749656	0.00645918	-0.660172	-0.0239208
ENSG00000136573	BLK	-0.721488	1.66615	-0.833584	-0.0152858	-0.183429	-0.16101
ENSG00000136630	HLX	-0.440772	2.04022	-0.540706	-0.327278	-0.535553	-0.44145
ENSG00000136960	ENPP2	-1.10624	0.744489	-0.81146	1.08991	-0.885451	1.02117
ENSG00000137101	CD72	-0.614242	1.20743	-0.331213	1.1251	-1.0568	-0.550775
ENSG00000137203	TFAP2A	-0.147694	1.94957	-0.635086	-0.26585	-0.583393	-0.635086
ENSG00000137269	LRRC1	-0.481464	1.85746	-0.763495	-0.234471	-0.634734	0.0877757
ENSG00000137441	FGFBP2	-0.492458	1.9044	-0.746878	0.0150537	-0.685909	-0.241235
ENSG00000137460	FHDC1	-0.0558537	0.725688	-0.317873	1.13679	-1.41113	-0.209452
ENSG00000137491	SLCO2B1	-0.368807	1.82867	-0.294975	-0.35715	-0.415438	-0.621391
ENSG00000137509	PRCP	-1.35092	1.53359	-0.615094	0.290984	-0.218551	0.274959
ENSG00000137834	SMAD6	-1.15396	1.1363	-0.942975	0.71438	-0.731417	0.989241
ENSG00000137841	PLCB2	-0.100122	1.59689	-0.57197	0.469368	-1.11964	-0.556696
ENSG00000138207	RBP4	-0.740254	1.86376	-0.814517	0.201441	-0.634704	-0.10581
ENSG00000138604	GLCE	-0.593041	1.74343	-0.715526	-0.114359	-0.701622	0.269646
ENSG00000138669	PRKG2	-0.683849	1.93141	-0.740074	0.102541	-0.729822	-0.0869613
ENSG00000138741	TRPC3	-0.281753	1.88964	-0.649963	-0.161821	-0.906658	-0.0692427
ENSG00000138744	NAAA	-0.685685	1.97624	-0.576867	-0.232845	-0.495504	-0.172746
ENSG00000138792	ENPEP	-0.629805	1.40372	-0.373613	0.133433	-0.725877	0.131654
ENSG00000138795	LEF1	-0.73863	1.64177	-0.555425	0.593128	-0.655584	-0.565491
ENSG00000138796	HADH	-0.820632	1.77588	-0.760248	0.0399182	-0.641957	0.289299
ENSG00000138867	GUCD1	-0.940392	1.63212	-0.958911	-0.075898	-0.296399	0.533002
ENSG00000139055	ERP27	-0.652192	1.91425	-0.681528	-0.141175	-0.552827	-0.0758783
ENSG00000139117	CPNE8	-0.90593	0.891655	-0.534705	0.742889	-1.0361	0.944687
ENSG00000139209	SLC38A4	-0.61879	1.99797	-0.665129	-0.203063	-0.625796	-0.0686381
ENSG00000139219	COL2A1	-1.09804	1.1173	-1.04822	0.763039	-0.540548	0.725889
ENSG00000139410	SDSL	-0.458782	1.65525	-0.24609	0.140623	-0.387885	-1.01952
ENSG00000139874	SSTR1	-0.0143019	1.77263	-0.703941	-0.0024286	-0.6703	-0.743519
ENSG00000140090	SLC24A4	-0.756113	0.769615	-0.963144	0.715607	0.162024	-0.225033
ENSG00000140284	SLC27A2	0.00811845	1.77317	-0.431392	0.107928	-0.963708	-0.802612
ENSG00000140479	PCSK6	-0.917982	1.30948	-0.978011	0.829947	-0.911774	0.565114
ENSG00000140545	MFGE8	-1.22309	1.3626	-1.03064	0.334375	0.00953397	0.386088
ENSG00000140873	ADAMTS18	0.257136	1.83443	-0.585477	-0.133719	-0.906179	-0.816752
ENSG00000141052	MYOCD	-0.845439	1.77395	-0.701046	0.28489	-0.682997	-0.0061531
ENSG00000141255	SPATA22	-0.89412	0.936429	-1.04925	0.00564114	-0.273595	1.35011
ENSG00000141338	ABCA8	-0.635483	1.87282	-0.751345	0.0637516	-0.657843	-0.106314
ENSG00000141401	IMPA2	-1.13896	1.49158	-0.484906	0.178154	-0.519718	0.470162
ENSG00000141447	OSBPL1A	-0.963368	1.79237	-0.653852	0.223546	-0.674819	0.15021
ENSG00000141485	SLC13A5	-0.507548	2.01124	-0.603474	-0.0846283	-0.608291	-0.477562
ENSG00000141524	TMC6	-1.23222	0.634015	-0.768194	1.02298	-0.706426	1.14374
ENSG00000143013	LMO4	-0.803811	1.69315	-0.646265	0.362798	-0.826993	0.0794017
ENSG00000143416	SELENBP1	-1.42193	1.30169	-0.944243	0.370162	-0.0155475	0.63175
ENSG00000143512	HHIPL2	-0.987153	0.410702	-0.975755	1.13425	-0.680774	1.13972
ENSG00000144227	NXPH2	-0.462118	1.92358	-0.717829	-0.226078	-0.731879	0.0464928
ENSG00000144331	ZNF385B	-0.88606	1.05225	-0.937114	0.503065	-0.991629	1.36694
ENSG00000144366	GULP1	-1.03533	0.91316	-0.605865	0.763564	-0.968012	1.04136
ENSG00000144681	STAC	-0.100035	1.6364	-0.682748	0.223838	-0.880454	-0.490245
ENSG00000145287	PLAC8	-0.992801	0.0891083	-0.687647	0.976829	-0.669153	1.48234
ENSG00000145358	DDIT4L	-0.767904	-0.0088096	-0.767587	1.0429	-0.766004	1.43401
ENSG00000145365	TIFA	-0.980952	1.8316	-0.189306	0.0590046	-0.607256	-0.213892
ENSG00000145569	OTULINL	-0.254598	1.3413	-0.360163	0.596131	-1.32888	-0.111775
ENSG00000145681	HAPLN1	-1.08858	0.577726	-0.861871	0.868127	-0.69344	1.31009
ENSG00000145708	CRHBP	-0.757998	1.82601	-0.546667	0.0873269	-0.738786	-0.0087327
ENSG00000145945	FAM50B	-0.295835	1.6328	0.185801	0.313539	-1.08739	-0.93662
ENSG00000145949	MYLK4	-0.231955	1.87694	-0.613813	-0.284026	-0.329589	-0.761349
ENSG00000146122	DAAM2	-1.159	1.00534	-0.895175	0.532534	-0.689273	1.30904
ENSG00000146233	CYP39A1	-0.734793	1.20285	-0.239179	0.767866	-1.24095	0.24589
ENSG00000146250	PRSS35	-1.29886	1.33244	-0.887445	0.472848	-0.305338	0.619323
ENSG00000146376	ARHGAP18	0.184328	1.81574	-0.838539	-0.434571	-1.01463	0.104052
ENSG00000146477	SLC22A3	-0.688973	1.58934	-0.5949	0.325244	-0.97119	0.25567
ENSG00000146926	ASB10	-0.67676	1.76272	-0.769443	0.346249	-0.776438	-0.104924
ENSG00000147041	SYTL5	0.0566546	1.61238	-0.83948	0.252258	-0.962301	-0.439176
ENSG00000147206	NXF3	-0.817587	1.29225	-1.00229	0.397169	-0.796276	0.901542
ENSG00000147257	GPC3	-0.130222	1.53336	-0.825072	-0.141546	-1.15601	0.684304
ENSG00000147588	PMP2	-0.179994	0.312644	-0.647609	0.0569412	-1.03155	1.77023
ENSG00000148180	GSN	-1.00654	1.66423	-0.930486	0.409173	-0.431546	0.0833896
ENSG00000148346	LCN2	-1.04056	1.54632	-0.736542	0.153389	-0.524423	0.556897
ENSG00000148488	ST8SIA6	-0.776761	1.22477	-0.642204	0.871562	-0.440368	-0.530073
ENSG00000148660	CAMK2G	-0.454465	1.57327	-0.789748	0.599004	-1.13839	0.0171985
ENSG00000148702	HABP2	-0.414183	0.762369	-0.589414	-0.639479	-0.514315	1.66356
ENSG00000149090	PAMR1	-1.17478	0.701191	-0.77712	1.43297	-0.593379	0.289115
ENSG00000149150	SLC43A1	-1.34762	0.978841	-0.635868	0.546974	-0.544057	1.12369
ENSG00000149257	SERPINH1	-1.27012	1.03566	-0.539579	0.719124	-0.521251	0.588362
ENSG00000150540	HNMT	-1.16677	1.14907	-0.926904	0.481841	-0.637816	1.15847
ENSG00000150722	PPP1R1C	-0.0961613	1.66383	-0.905047	0.161616	-0.798381	-0.33616
ENSG00000150893	FREM2	-0.493136	1.17865	-0.488119	1.05785	-1.06386	-0.417884
ENSG00000150938	CRIM1	-1.20527	1.26519	-0.850057	0.639267	-0.596989	0.713787
ENSG00000151617	EDNRA	-1.2148	0.689389	-0.747644	1.21602	-0.698627	0.758332
ENSG00000151726	ACSL1	-0.596874	1.05654	-1.17492	-0.291905	-0.497496	1.61457
ENSG00000152056	AP1S3	-1.13447	0.926786	-0.442422	0.346361	-0.673104	1.15499
ENSG00000152076	CCDC74B	-0.0224316	1.22306	-0.760718	0.904343	-1.07699	-0.609927
ENSG00000152229	PSTPIP2	-1.3617	1.34604	-0.202346	0.64346	-0.765572	0.386041
ENSG00000152315	KCNK13	-1.0604	0.833817	-0.618889	1.26108	-0.519194	-0.06819
ENSG00000152558	TMEM123	-0.707433	1.93936	-0.328316	-0.0158207	-0.789305	-0.240746
ENSG00000152592	DMP1	-0.252236	1.81972	-0.690048	-0.108516	-0.647465	-0.391963
ENSG00000152595	MEPE	-0.572909	2.01652	-0.593707	-0.302526	-0.458516	-0.316392
ENSG00000152818	UTRN	-0.920518	0.380744	-0.482712	0.818031	-1.00651	1.45372
ENSG00000153179	RASSF3	-1.0899	1.37075	-0.496042	0.314393	-0.685377	0.61621
ENSG00000153446	C16orf89	-0.477373	2.01744	-0.58451	-0.273778	-0.543515	-0.379192
ENSG00000153721	CNKSR3	-1.14743	0.730208	-0.698328	0.739986	-0.861545	1.41671
ENSG00000153898	MCOLN2	-1.27943	0.476938	-1.05031	0.62884	-0.0433266	1.33961
ENSG00000153902	LGI4	-0.660237	1.81849	-0.731339	0.369951	-0.849428	-0.173693
ENSG00000154143	PANX3	-0.495344	2.03065	-0.497441	-0.320541	-0.498293	-0.457853
ENSG00000154188	ANGPT1	-0.712338	1.99968	-0.5411	-0.220603	-0.561246	-0.132898
ENSG00000154217	PITPNC1	-0.033185	1.04809	-0.204641	0.710712	-1.68276	0.147489
ENSG00000154262	ABCA6	-0.732723	1.45375	-0.418328	-0.161095	-0.304002	0.0770831
ENSG00000154309	DISP1	-0.93312	1.77466	-0.654673	0.19978	-0.550648	0.00043985
ENSG00000154316	TDH	-0.390786	1.83708	-0.643087	0.194744	-0.862065	-0.395546
ENSG00000154359	LONRF1	-0.429935	1.07733	-0.784088	0.0310384	-1.22061	1.50698
ENSG00000154380	ENAH	-0.959582	1.14725	-0.821131	0.805118	-1.04384	0.889202
ENSG00000154654	NCAM2	0.203546	1.76597	-0.565899	-0.226539	-1.00069	-0.423821
ENSG00000154655	L3MBTL4	-0.366025	1.99971	-0.743102	-0.0981446	-0.71782	-0.347198
ENSG00000154734	ADAMTS1	-0.536534	1.84134	-0.823635	-0.129816	-0.264794	-0.389961
ENSG00000155324	GRAMD2B	-0.955557	0.77102	-0.829336	0.467689	-0.827997	1.5558
ENSG00000155465	SLC7A7	-0.798058	1.50141	-1.18907	0.59941	-0.319531	-0.12191
ENSG00000155792	DEPTOR	-0.350467	2.00594	-0.512309	-0.360643	-0.53363	-0.502618
ENSG00000156076	WIF1	-0.296424	1.00031	-0.90085	0.701685	-0.0596762	-0.893676
ENSG00000156110	ADK	-0.450214	1.85833	-0.725285	0.187837	-0.982142	-0.0931305
ENSG00000156218	ADAMTSL3	-0.632539	1.15836	-1.0239	-0.0228702	-0.796955	1.4159
ENSG00000156219	ART3	-0.900257	0.67361	-0.867758	0.877888	-0.997753	1.32977
ENSG00000156222	SLC28A1	-0.932668	0.99578	-0.778392	0.980353	-0.97895	0.692371
ENSG00000156398	SFXN2	-1.07806	0.686728	-0.934152	0.184306	-0.103514	1.34821
ENSG00000156869	FRRS1	-1.36966	0.51861	-0.797861	0.757968	-0.314712	1.34159
ENSG00000157110	RBPMS	-0.953794	1.25829	-0.641846	0.493165	-1.02578	0.946004
ENSG00000157150	TIMP4	-1.01524	0.949729	-1.20432	0.0491949	-0.275011	1.59276
ENSG00000157330	C1orf158	-0.52871	0.807355	-1.22294	0.551931	0.414395	-0.43702
ENSG00000157404	KIT	-0.605196	1.47441	-0.823565	0.63393	-1.07602	0.254062
ENSG00000157514	TSC22D3	-0.138903	1.95165	-0.775848	-0.587856	-0.513094	-0.173212
ENSG00000157557	ETS2	-0.975543	0.619387	-0.798147	1.01861	-0.992958	1.23882
ENSG00000157600	TMEM164	-0.521992	1.95616	-0.605901	-0.0833163	-0.665898	-0.307364
ENSG00000157734	SNX22	-0.932266	1.08278	-0.998004	0.500787	-0.877239	1.29926
ENSG00000157766	ACAN	-1.1177	0.5747	-0.945776	0.937043	-0.705942	1.36164
ENSG00000158006	PAFAH2	-1.27713	0.69246	-0.986252	0.871178	-0.28494	0.98416
ENSG00000158008	EXTL1	-0.759982	0.408536	-1.09327	1.27169	-0.823485	0.964258
ENSG00000158014	SLC30A2	-0.54336	1.57574	-0.858134	0.421572	-0.93308	0.163633
ENSG00000158022	TRIM63	-0.589918	1.35996	-0.76212	0.685851	-1.23253	0.464298
ENSG00000158220	ESYT3	-0.595257	0.514348	-1.14428	0.693503	-0.658828	1.20592
ENSG00000158315	RHBDL2	-0.608208	1.95022	-0.535719	-0.147691	-0.461098	-0.44191
ENSG00000158473	CD1D	-1.07678	0.737397	-0.944941	1.0927	-0.811576	1.02262
ENSG00000158516	CPA2	-0.115328	0.39947	-0.709797	1.42907	-0.813982	-0.489169
ENSG00000158683	PKD1L1	-0.195179	1.78857	-0.785281	-0.232845	-0.785281	0.0182623
ENSG00000159166	LAD1	-0.90743	0.453331	-1.01167	1.17174	-0.586257	0.836485
ENSG00000159173	TNNI1	0.11264	0.295405	-0.816415	1.54788	-1.11834	-0.300373
ENSG00000159248	GJD2	-0.765509	0.370737	-0.859235	0.7946	-0.91554	1.54685
ENSG00000159251	ACTC1	-0.953243	0.236097	-0.915994	0.494218	-0.53109	1.92135
ENSG00000159307	SCUBE1	-0.721862	1.64727	-0.848082	0.471575	-0.992904	0.309315
ENSG00000159387	IRX6	-0.394574	1.84411	-0.496827	-0.319516	-0.397838	-0.479422
ENSG00000159674	SPON2	-0.722534	1.79162	-0.967066	0.0935881	-0.200003	-0.316501
ENSG00000160255	ITGB2	0.0551674	1.97654	-0.61543	-0.475167	-0.624704	-0.627023
ENSG00000160307	S100B	-1.02831	0.688853	-1.06585	0.316323	-0.319394	1.52255
ENSG00000160360	GPSM1	-0.806945	1.41247	-1.02542	0.309363	-0.852646	0.942431
ENSG00000160678	S100A1	-1.03562	1.45526	-1.11023	0.417579	-0.255669	0.334836
ENSG00000160801	PTH1R	-0.701312	1.88666	-0.745396	0.235474	-0.699045	-0.21697
ENSG00000160808	MYL3	-1.3123	1.11511	-0.849186	0.675625	-0.327789	0.648322
ENSG00000160862	AZGP1	-0.660788	1.02532	-0.934721	0.50815	-0.90166	0.973363
ENSG00000160867	FGFR4	-0.9668	0.736664	-0.938777	1.03185	-0.741778	0.858867
ENSG00000162493	PDPN	-0.795739	1.72892	-0.83943	0.292176	-0.853511	0.343639
ENSG00000162494	LRRC38	-0.548672	1.92398	-0.548672	-0.189739	-0.522084	-0.335971
ENSG00000162496	DHRS3	-1.29974	0.553593	-1.08384	1.06218	-0.281113	1.03729
ENSG00000162510	MATN1	-0.933991	0.691648	-0.898406	0.988828	-0.990532	1.2238
ENSG00000162511	LAPTM5	-0.588392	1.681	-0.779191	0.478643	-1.06214	0.100372
ENSG00000162542	TMCO4	-1.25638	0.596889	-0.942623	0.492132	-0.265813	1.52018
ENSG00000162551	ALPL	-0.49192	2.03057	-0.532713	-0.212511	-0.548872	-0.503635
ENSG00000162722	TRIM58	-0.122677	1.71138	-0.801129	-0.048122	-0.987517	0.0637108
ENSG00000162878	PKDCC	-1.28819	0.98119	-0.836547	0.514994	-0.401251	1.09423
ENSG00000162998	FRZB	-0.815928	1.56156	-0.91528	0.49677	-0.945566	0.519502
ENSG00000163064	EN1	-0.0461835	1.26015	-0.86869	0.860993	-0.844499	-0.771924
ENSG00000163171	CDC42EP3	-1.18155	1.68519	-0.63885	-0.118865	-0.0423994	0.182342
ENSG00000163362	INAVA	-0.999433	1.06741	-0.878486	0.906333	-0.896006	0.774083
ENSG00000163394	CCKAR	-0.791237	1.14937	-1.0452	0.889428	-0.732973	0.359085
ENSG00000163435	ELF3	-0.571395	0.274002	-0.608151	1.38895	-1.02472	0.519045
ENSG00000163492	CCDC141	-0.404566	1.48369	-0.940792	-0.106662	-0.633722	0.489145
ENSG00000163499	CRYBA2	-0.363864	1.95561	-0.54961	-0.225261	-0.607125	-0.462865
ENSG00000163501	IHH	-0.529865	2.01702	-0.543199	-0.200299	-0.540526	-0.451911
ENSG00000163520	FBLN2	-1.28125	1.15075	0.27294	0.911273	-0.444057	-0.721892
ENSG00000163536	SERPINI1	-0.237786	1.91344	-0.569304	0.0999735	-0.95154	-0.529474
ENSG00000163659	TIPARP	-0.693826	1.75284	-0.72063	0.0505352	-0.965254	0.528236
ENSG00000163710	PCOLCE2	-1.05093	1.40053	-1.04759	0.678821	-0.593773	0.468059
ENSG00000163754	GYG1	-0.848908	1.88435	-0.70992	-0.133806	-0.608005	0.318416
ENSG00000163884	KLF15	-0.904301	0.917895	-0.984787	0.385388	-0.823022	1.55017
ENSG00000163975	MELTF	-1.19946	1.60969	-0.998722	0.191919	0.15236	-0.0072958
ENSG00000163993	S100P	-0.791337	1.65715	-0.800961	0.640012	-0.852502	-0.070141
ENSG00000164023	SGMS2	-0.745549	1.96214	-0.27275	-0.54577	-0.143446	-0.430416
ENSG00000164050	PLXNB1	-0.378581	1.66799	-0.954275	0.5618	-0.963077	-0.229905
ENSG00000164099	PRSS12	-0.883408	0.932138	-1.15026	0.695581	-0.597908	0.955056
ENSG00000164106	SCRG1	-0.706803	1.94924	-0.722309	-0.33486	-0.170512	-0.260439
ENSG00000164116	GUCY1A1	-0.332115	1.83056	-0.933286	-0.0531104	-0.780682	0.0470847
ENSG00000164161	HHIP	-0.415146	1.94647	-0.744815	0.0314061	-0.586584	-0.556715
ENSG00000164292	RHOBTB3	-1.25229	1.12635	-0.711579	0.569106	-0.74972	1.12031
ENSG00000164300	SERINC5	-0.573787	1.95618	-0.654128	0.00972389	-0.76687	-0.179537
ENSG00000164330	EBF1	-0.900455	1.1294	-0.868985	0.0743495	-0.758837	1.47637
ENSG00000164379	FOXQ1	-1.01815	0.0656869	0.678765	0.689713	-1.04278	1.06194
ENSG00000164442	CITED2	-0.258082	1.57251	-0.970138	-0.129817	-1.02186	0.753138
ENSG00000164530	PI16	-0.327426	1.87161	-0.548644	-0.399172	-0.524729	-0.278399
ENSG00000164532	TBX20	-0.579661	1.73966	-0.721355	-0.154576	-0.624406	0.213333
ENSG00000164591	MYOZ3	-0.770605	1.24337	-0.812317	1.22977	-0.879419	-0.285171
ENSG00000164626	KCNK5	-1.08435	1.58381	-0.970281	0.3822	-0.546697	0.523669
ENSG00000164647	STEAP1	-0.694322	1.40634	-0.904612	-0.674188	-0.130567	1.02826
ENSG00000164683	HEY1	-0.0549317	1.78203	-0.470561	0.123289	-0.902188	-0.7937
ENSG00000164687	FABP5	-0.336409	0.674483	-0.707965	-0.24118	-0.856506	1.72078
ENSG00000164756	SLC30A8	-0.151294	0.888855	-0.937185	1.09688	-0.821613	-0.413258
ENSG00000164794	KCNV1	-0.339804	1.75781	-0.639463	0.117569	-0.734092	-0.429176
ENSG00000165060	FXN	-1.32838	1.05952	-0.947195	0.336577	-0.237396	1.17344
ENSG00000165124	SVEP1	-1.13792	1.62686	0.0463119	0.220449	-0.427382	-0.422324
ENSG00000165238	WNK2	0.0703689	1.18755	-0.634131	0.780654	-1.46917	-0.125062
ENSG00000165269	AQP7	-0.932667	0.702398	-0.962228	0.951814	-0.899412	1.19938
ENSG00000165449	SLC16A9	-0.91828	1.04635	-0.884377	0.330494	-0.881198	1.44789
ENSG00000165730	STOX1	-0.432501	1.85282	-0.297186	0.00995826	-0.737497	-0.626524
ENSG00000165795	NDRG2	-0.935623	1.72779	-0.811473	0.33566	-0.721821	0.270136
ENSG00000165807	PPP1R36	-1.30323	0.568473	-0.239764	0.759898	-0.558805	0.951323
ENSG00000165863	C10orf82	-0.387513	0.852854	-0.461983	1.20137	-1.24362	-0.102145
ENSG00000165895	ARHGAP42	-0.710191	1.72064	-0.145489	0.10305	-0.635451	-0.491903
ENSG00000165983	PTER	-0.872388	1.29952	-0.648329	0.941479	-0.973722	0.121805
ENSG00000166025	AMOTL1	-1.41943	1.29696	-0.875483	0.239561	0.0508091	0.651625
ENSG00000166091	CMTM5	-1.17438	0.590619	-0.789251	1.27281	-0.625718	0.704801
ENSG00000166265	CYYR1	-0.361887	1.76624	-0.605396	0.36245	-0.967048	-0.460941
ENSG00000166510	CCDC68	-0.678164	1.80622	-0.871016	-0.148582	-0.760341	0.578833
ENSG00000166682	TMPRSS5	-0.698328	0.675258	-0.840655	0.566499	-0.89772	1.31304
ENSG00000166925	TSC22D4	-0.881262	1.59332	-0.970598	0.343386	-0.792172	0.619575
ENSG00000167107	ACSF2	-1.23316	0.517289	-0.867224	1.03152	-0.531468	1.15498
ENSG00000167261	DPEP2	-0.682994	1.61548	-0.500031	0.431939	-0.803064	-0.248456
ENSG00000167323	STIM1	-0.7409	1.91936	-0.673176	-0.187763	-0.482452	-0.0044816
ENSG00000167941	SOST	-0.882402	1.35003	-0.189418	0.815175	-0.840544	-0.400259
ENSG00000168032	ENTPD3	-0.0485161	1.58216	-0.351592	0.0305472	-0.888563	-0.54925
ENSG00000168065	SLC22A11	-0.459552	0.27182	-0.87782	1.09641	-1.06186	1.08207
ENSG00000168079	SCARA5	-0.644728	1.83767	-0.653623	0.0465554	-0.619313	-0.173283
ENSG00000168329	CX3CR1	-0.752842	1.618	-0.26309	0.248923	-0.853018	-0.0849983
ENSG00000168427	KLHL30	-1.07499	1.47378	-0.504592	0.5814	-0.572434	-0.0390921
ENSG00000168453	HR	-0.945117	0.293242	-1.22545	0.96193	-0.394202	1.33764
ENSG00000168575	SLC20A2	-0.906672	1.66538	-0.667354	0.381079	-0.671517	0.0429903
ENSG00000168743	NPNT	-0.0671312	1.99046	-0.673856	-0.401329	-0.570567	-0.594718
ENSG00000168874	ATOH8	-0.967725	0.531328	-0.888635	0.546819	-0.790058	1.79482
ENSG00000168907	PLA2G4F	-0.599367	1.73847	-0.576941	-0.22935	-0.750737	0.36492
ENSG00000168913	ENHO	-0.407033	1.25033	-0.782012	0.719081	-1.21039	0.31269
ENSG00000169071	ROR2	-1.11041	1.38471	-1.04273	0.168044	-0.321511	0.881613
ENSG00000169174	PCSK9	-0.738494	-0.219936	-0.733648	0.901508	-0.722986	1.77353
ENSG00000169271	HSPB3	-0.534154	1.94238	-0.787742	-0.339916	-0.501781	0.032373
ENSG00000169436	COL22A1	0.178071	1.50123	0.468447	-0.555351	-0.514439	-1.28112
ENSG00000169583	CLIC3	-1.08285	0.0415104	-0.957317	1.11319	-0.35188	1.3307
ENSG00000169594	BNC1	-0.95094	0.905691	-0.787662	0.637072	-0.871934	1.16114
ENSG00000169710	FASN	-0.617039	1.41555	-0.854384	0.0972842	-0.957683	0.936896
ENSG00000170271	FAXDC2	-0.857499	1.6534	-0.55656	0.367752	-1.02486	0.371505
ENSG00000170293	CMTM8	-0.541065	1.78023	-0.215226	0.156808	-0.897426	-0.4495
ENSG00000170374	SP7	-0.570811	1.97416	-0.631031	0.0425038	-0.644388	-0.437589
ENSG00000170381	SEMA3E	-1.07487	1.32283	-1.07297	0.301418	-0.53459	1.05326
ENSG00000170442	KRT86	-0.409619	1.66843	-0.602405	0.215814	-0.987977	-0.0464643
ENSG00000170608	FOXA3	-1.14366	0.734402	-0.850648	1.33341	-0.705682	0.559349
ENSG00000170891	CYTL1	-0.0079425	1.91291	-0.560146	-0.447274	-0.689092	-0.464652
ENSG00000170962	PDGFD	-0.191528	2.01873	-0.659709	-0.400948	-0.677021	-0.339272
ENSG00000171119	NRTN	-0.368425	1.28898	-1.04716	0.406061	-0.927463	0.514959
ENSG00000171227	TMEM37	-1.04882	1.52203	-0.511545	0.765217	-0.875509	0.0276605
ENSG00000171243	SOSTDC1	-1.17954	1.09723	-0.906595	0.684485	-0.214242	0.389348
ENSG00000171345	KRT19	-0.473494	1.7631	-0.68016	0.244065	-0.898494	-0.166739
ENSG00000171346	KRT15	-0.518877	1.64183	-1.03922	0.4997	-0.934746	0.122003
ENSG00000171388	APLN	-0.0315935	1.9546	-0.436311	-0.724452	-0.427512	-0.591745
ENSG00000171408	PDE7B	-0.465471	2.00561	-0.696741	-0.440241	-0.346332	-0.30802
ENSG00000171517	LPAR3	-0.999714	1.12453	-0.783932	0.82955	-0.949949	0.778046
ENSG00000171791	BCL2	-0.660288	1.4508	-0.891282	0.687731	-1.1478	0.450697
ENSG00000171873	ADRA1D	-0.483192	1.85753	-0.582338	0.20809	-0.723024	-0.563528
ENSG00000171885	AQP4	-0.294644	1.51837	-1.17315	-0.0518627	-0.259565	-0.0432469
ENSG00000171914	TLN2	-0.537675	1.92107	-0.617793	0.0202872	-0.745135	-0.260272
ENSG00000172197	MBOAT1	-1.2776	1.27131	-0.891899	0.704172	-0.52427	0.660418
ENSG00000172201	ID4	-0.357279	1.46073	-0.604199	0.383005	-1.30092	0.356828
ENSG00000172348	RCAN2	-0.525847	1.5995	-0.858675	0.453773	-1.16635	0.377238
ENSG00000172403	SYNPO2	-0.552355	1.49246	-0.770615	-0.0475538	-0.493828	0.238988
ENSG00000172738	TMEM217	-0.647853	1.15422	-1.05742	-0.0130315	0.478443	-0.238291
ENSG00000173110	HSPA6	-0.0247463	1.3902	0.222308	0.260938	-1.38175	-0.548501
ENSG00000173198	CYSLTR1	-0.64726	1.94958	-0.284887	-0.212413	-0.524768	-0.468626
ENSG00000173269	MMRN2	-0.360486	1.26501	-0.798084	0.69622	-1.35789	0.474276
ENSG00000173376	NDNF	-0.272102	1.90903	-0.752385	0.0152951	-0.670376	-0.556741
ENSG00000173597	SULT1B1	-0.769111	1.10963	-0.899086	0.146625	-0.828191	1.35382
ENSG00000173598	NUDT4	-0.383064	1.95891	-0.468552	-0.243324	-0.859809	-0.161733
ENSG00000173714	WFIKKN2	-0.937772	1.04918	-0.675114	1.12356	-0.625735	-0.137193
ENSG00000173868	PHOSPHO1	-0.59937	2.01159	-0.652029	-0.0545419	-0.624021	-0.326183
ENSG00000173930	SLCO4C1	-0.310883	1.97461	-0.774237	-0.353523	-0.643475	-0.11474
ENSG00000174564	IL20RB	-0.607061	1.55826	-0.783718	0.225755	-0.947758	0.478123
ENSG00000174640	SLCO2A1	-0.575349	1.78564	-0.733077	0.104853	-0.71829	-0.0627328
ENSG00000174749	FAM241A	-0.652772	1.64816	-0.375073	-0.365156	-0.553594	0.27289
ENSG00000174804	FZD4	-0.633497	1.60239	-0.592371	0.441816	-1.07486	0.144567
ENSG00000174807	CD248	-1.39746	1.39578	-0.663342	0.230694	0.0260162	0.323308
ENSG00000174899	SLC66A1L	-0.520533	1.82573	-0.775826	-0.374651	-0.629944	0.375019
ENSG00000175040	CHST2	-0.926007	1.68355	-0.450386	0.302202	-0.502868	-0.292119
ENSG00000175318	GRAMD2A	-0.98832	0.697391	-0.997699	0.645312	-0.721935	1.48777
ENSG00000175356	SCUBE2	-0.727389	-0.317384	-0.758525	1.13175	-0.726173	1.61079
ENSG00000175445	LPL	0.303869	1.83888	-0.24056	-0.336143	-0.942637	-0.9114
ENSG00000175899	A2M	-1.00554	0.587096	-0.909406	1.19699	-0.896439	1.0666
ENSG00000175920	DOK7	-0.839178	0.444068	-1.14772	1.11725	-0.599358	0.984013
ENSG00000176170	SPHK1	-0.982897	0.413496	-0.75853	0.663684	-0.809385	1.712
ENSG00000176273	SLC35G1	-0.984733	1.49995	-0.5599	0.127775	-0.443964	0.294532
ENSG00000176834	VSIG10	-0.762641	1.74223	-0.868577	0.284815	-0.578349	-0.0461585
ENSG00000176842	IRX5	-0.465913	2.02294	-0.560669	-0.292102	-0.53803	-0.408524
ENSG00000177156	TALDO1	-0.779158	1.91074	-0.845179	-0.261543	-0.263018	0.0358223
ENSG00000177335	C8orf31	-0.628174	1.41849	-1.10792	0.327452	-0.852572	0.754325
ENSG00000177354	C10orf71	-0.447532	1.39854	-0.796993	0.190615	-0.891955	0.464107
ENSG00000177459	ERICH5	-0.923406	1.25686	-0.649804	0.102601	-0.778055	1.10581
ENSG00000177508	IRX3	-0.320219	1.97462	-0.657636	-0.1713	-0.665686	-0.432244
ENSG00000178021	TSPYL6	-0.65265	-0.0803989	-0.4619	0.908035	-0.756696	1.23751
ENSG00000178033	CALHM5	-0.412556	1.6772	-0.631012	-0.313632	-0.288901	-0.251805
ENSG00000178055	PRSS42P	-1.24868	0.505778	-0.806173	1.07948	-0.474849	0.990533
ENSG00000178075	GRAMD1C	-1.16516	0.65282	0.352154	0.834617	-0.850509	0.352154
ENSG00000178343	SHISA3	-0.651438	1.59038	0.0424587	-0.437931	-0.0576225	-0.633646
ENSG00000178425	NT5DC1	-1.46965	0.691073	-0.659438	0.995259	-0.175787	0.60491
ENSG00000178537	SLC25A20	-0.413015	2.00235	-0.714904	-0.601263	-0.27961	-0.229707
ENSG00000178562	CD28	-0.559289	1.85968	-0.692618	-0.0640671	-0.673571	-0.0577181
ENSG00000178695	KCTD12	-0.65784	1.91958	-0.514697	0.0727135	-0.694426	-0.338676
ENSG00000178726	THBD	-0.609661	1.48747	-0.435845	0.480845	-0.936133	-0.127511
ENSG00000179082		-0.675959	0.499794	-0.930705	0.197146	-0.745633	1.89691
ENSG00000179219	LINC00311	-0.592103	0.0341598	-0.731272	0.660422	-0.779982	1.63461
ENSG00000179270	PCARE	-0.270571	1.71853	-0.614365	-0.0348259	-0.417911	-0.712592
ENSG00000179348	GATA2	-1.01672	1.19984	-0.839918	0.791199	-0.878443	0.712086
ENSG00000179564	LSMEM2	-0.772951	1.50062	-0.876553	0.480917	-0.964544	0.551168
ENSG00000179593	ALOX15B	-0.7529	0.591786	-0.795245	1.36018	-0.830359	0.303639
ENSG00000179603	GRM8	0.00679645	1.39137	-0.879371	0.431439	-0.666053	-0.672033
ENSG00000179604	CDC42EP4	-0.18158	1.69438	-0.67127	0.265835	-1.17727	-0.13055
ENSG00000181804	SLC9A9	-0.852417	1.76235	-0.508658	0.405596	-0.746364	-0.250229
ENSG00000181856	SLC2A4	-0.795813	1.64265	-0.812486	0.35636	-0.979063	0.513642
ENSG00000182118	FAM89A	-0.495124	1.56226	-0.391439	0.647739	-1.12888	-0.389886
ENSG00000182168	UNC5C	-0.630397	1.41553	-1.26329	-0.0095317	-0.614575	1.04859
ENSG00000182255	KCNA4	-0.269244	1.80465	-0.578352	-0.107502	-0.952157	-0.0559836
ENSG00000182568	SATB1	-0.994645	1.18024	-0.86883	0.695486	-0.911506	0.909398
ENSG00000182600	SNORC	-0.80954	1.78018	-0.882607	0.297028	-0.690784	0.113422
ENSG00000182795	C1orf116	-0.796958	0.00907606	-0.793532	0.885583	-0.780808	1.70434
ENSG00000183090	FREM3	-0.33891	1.96503	-0.616943	-0.079526	-0.799191	-0.379598
ENSG00000183160	TMEM119	-0.340989	1.97353	-0.493631	-0.516227	-0.250839	-0.660337
ENSG00000183287	CCBE1	-0.748044	0.817271	0.0910216	1.07111	-0.388444	-1.09354
ENSG00000183578	TNFAIP8L3	-0.766122	1.87371	-0.96858	-0.212096	-0.220304	0.068336
ENSG00000183682	BMP8A	-0.330767	2.0069	-0.489497	-0.227695	-0.633797	-0.596692
ENSG00000183691	NOG	-0.921941	1.41351	-0.841892	0.702122	-0.913954	0.46891
ENSG00000183773	AIFM3	-1.04161	1.08481	-0.746608	1.15015	-0.45952	-0.23183
ENSG00000183801	OLFML1	-1.22507	0.670181	-0.189188	0.879216	0.043074	-0.300673
ENSG00000183971	NPW	-1.18417	1.28232	-0.913705	0.527126	-0.423967	0.645294
ENSG00000184160	ADRA2C	-0.229804	1.22762	-0.644097	0.44308	-1.41597	0.610862
ENSG00000184304	PRKD1	-1.05461	0.547867	-0.91098	0.590258	-0.647006	1.6623
ENSG00000184307	ZDHHC23	-0.392524	1.36038	-0.850353	0.47634	-1.121	0.419428
ENSG00000184347	SLIT3	-0.607252	1.3674	-0.443113	1.05631	-1.06972	-0.552539
ENSG00000184371	CSF1	-0.630882	1.5257	-0.602758	0.726937	-1.07639	-0.124394
ENSG00000184374	COLEC10	-0.758521	1.01503	-0.274826	0.793332	-0.899598	0.0745085
ENSG00000184481	FOXO4	-0.746557	1.75256	-0.835305	0.22117	-0.825385	0.299585
ENSG00000185008	ROBO2	0.051997	1.60144	-0.785671	0.351454	-1.0237	-0.522578
ENSG00000185267	CDNF	-1.09271	0.872999	-0.637986	0.561492	-0.480442	0.822871
ENSG00000185269	NOTUM	-0.690071	1.89097	-0.556056	0.255422	-0.711034	-0.437663
ENSG00000185432	METTL7A	-0.805773	0.690939	-0.844695	0.678201	-1.05841	1.50475
ENSG00000185477	GPRIN3	0.299447	1.71216	-0.51929	-0.0104548	-0.978896	-0.843718
ENSG00000185518	SV2B	-0.407102	1.7994	-0.575906	0.314534	-0.899044	-0.50115
ENSG00000185532	PRKG1	-0.725219	1.8953	-0.684351	-0.0374184	-0.601267	-0.0241699
ENSG00000185585	OLFML2A	-0.0176928	1.93356	-0.491996	-0.243857	-0.746338	-0.742237
ENSG00000185860	CCDC190	-0.882973	0.358607	-0.681955	0.770102	-0.748173	1.35187
ENSG00000185920	PTCH1	-0.301824	1.81387	-0.747102	0.401577	-0.919709	-0.578113
ENSG00000185924	RTN4RL1	-0.798019	1.23737	-0.2173	0.636006	-1.32333	0.547931
ENSG00000185955	C7orf61	-0.347472	1.34809	-0.689138	0.600891	-1.10425	0.0261257
ENSG00000186191	BPIFB4	-0.937401	1.11935	-0.998888	0.0771385	-0.291785	1.04249
ENSG00000186197	EDARADD	-0.430772	0.150936	-1.13771	0.405433	-0.200513	1.2376
ENSG00000186281	GPAT2	-0.0671823	0.371211	-1.1235	0.909808	-0.793662	0.563268
ENSG00000186350	RXRA	-0.948035	1.43799	-0.957567	0.342406	-0.801124	0.915912
ENSG00000186439	TRDN	0.00783643	1.72227	-0.493405	-0.135831	-0.672192	-0.736044
ENSG00000186564	FOXD2	-0.296314	1.59504	-1.3652	0.087716	-0.62274	0.346936
ENSG00000186615	KTN1-AS1	-1.11907	1.37102	-0.354691	0.737945	-0.788463	0.0861149
ENSG00000186732	MPPED1	0.0329029	1.59622	-0.931616	0.565378	-1.06805	-0.570316
ENSG00000186998	EMID1	-0.537514	1.78918	-0.556078	0.330356	-0.679065	-0.647867
ENSG00000187068	C3orf70	-0.639512	1.93548	-0.755684	-0.130531	-0.480717	-0.157276
ENSG00000187098	MITF	-1.21854	1.03474	0.0778685	0.814813	-0.786402	0.129313
ENSG00000187398	LUZP2	-0.303373	1.76767	-0.648548	-0.0841749	-0.433758	-0.613274
ENSG00000187634	SAMD11	-1.03074	1.04669	-0.823232	1.01199	-0.928626	0.690816
ENSG00000187773	DIPK1C	-0.208696	1.92164	-0.163137	-0.348645	-0.60399	-0.850606
ENSG00000187862	TTC24	-0.59763	1.34021	-0.810219	0.776027	-0.842926	-0.0906851
ENSG00000188013		-0.334024	1.08248	-0.804131	0.41753	-1.20929	0.861864
ENSG00000188037	CLCN1	-0.475965	-0.0098865	-0.387927	1.26406	-0.973114	0.647801
ENSG00000188153	COL4A5	-1.68654	0.542482	0.348887	1.14239	-0.418363	0.211157
ENSG00000188505	NCCRP1	-0.630439	1.21202	0.162844	0.124459	-0.566464	-0.348951
ENSG00000188549	CCDC9B	-1.06051	0.451148	-1.20527	0.411367	0.225724	1.1683
ENSG00000188626	GOLGA8M	-0.883884	1.32583	-0.987549	0.523783	-0.638361	0.551063
ENSG00000188916	INSYN2A	-0.409957	1.91856	-0.613923	0.0782387	-0.751296	-0.500143
ENSG00000188921	HACD4	-0.747734	1.48352	-0.520731	0.727786	-1.19417	0.161539
ENSG00000189283	FHIT	-0.604872	1.16358	-0.231337	0.900941	-0.832495	-0.604872
ENSG00000189334	S100A14	-0.196742	0.505909	-0.91813	0.393484	-0.955605	1.2554
ENSG00000189431	RASSF10	0.345545	1.19074	-0.440758	0.598626	-1.2971	-0.676331
ENSG00000196353	CPNE4	-0.46614	1.8125	-0.782416	0.252153	-0.8083	-0.271198
ENSG00000196372	ASB13	-0.531928	1.95377	-0.60328	-0.192454	-0.352761	-0.565561
ENSG00000196502	SULT1A1	-1.06654	0.909226	-0.985305	1.00245	-0.732882	0.835625
ENSG00000196954	CASP4	-0.501645	0.617658	-1.02921	0.621223	-0.508774	0.724598
ENSG00000197142	ACSL5	-0.370492	0.862683	-0.862883	-0.311141	-0.647462	1.48477
ENSG00000197165	SULT1A2	-0.45575	0.559755	-0.995639	0.778281	-0.751403	0.821129
ENSG00000197249	SERPINA1	-0.812441	1.75527	-0.729371	-0.183766	-0.125771	-0.115013
ENSG00000197308	GATA3-AS1	-0.762194	1.65751	-0.984262	0.268539	-0.711914	0.381668
ENSG00000197442	MAP3K5	-0.875353	1.03736	-0.919537	0.713643	-1.0684	1.17654
ENSG00000197520	FAM177B	-0.545578	1.75508	-0.215353	-0.0952714	-0.783012	-0.22627
ENSG00000197565	COL4A6	-0.739705	1.27363	0.0189744	0.941595	-1.10587	-0.511849
ENSG00000197635	DPP4	-0.380812	1.95247	-0.89871	-0.358852	-0.457673	-0.108138
ENSG00000198246	SLC29A3	-0.876536	0.600714	-1.37463	0.52117	-0.132229	1.22381
ENSG00000198355	PIM3	-0.646689	0.736861	-0.566408	0.918755	-1.33137	0.99633
ENSG00000198467	TPM2	-0.999199	1.67229	-0.862469	0.0875754	-0.526831	0.550693
ENSG00000198598	MMP17	-0.139333	1.83525	-0.861295	0.144446	-1.0656	-0.171731
ENSG00000198648	STK39	-0.640082	1.50549	-0.9554	0.288694	-1.04544	0.810521
ENSG00000198691	ABCA4	-0.342942	1.20402	-0.549665	0.872426	-0.698118	-0.830846
ENSG00000198719	DLL1	0.204278	1.35092	-0.449005	0.696716	-1.34181	-0.764459
ENSG00000198796	ALPK2	-0.167834	1.82379	-0.894264	-0.505636	-0.550207	0.0941181
ENSG00000198838	RYR3	-0.117089	1.18687	-0.940464	0.777508	-1.00769	-0.178992
ENSG00000198848	CES1	-0.874236	1.58582	-0.75961	0.526531	-0.785261	0.155799
ENSG00000198948	MFAP3L	-1.36424	0.779643	-0.727884	0.628997	-0.501112	1.33683
ENSG00000203527	SCUBE1-AS1	-0.619286	0.85	-0.871588	0.820318	-0.827064	0.572963
ENSG00000203688	LINC02487	-0.874502	1.47772	-0.827691	0.213838	-0.769178	0.763859
ENSG00000203805	PLPP4	-0.76715	0.381696	-0.665214	1.07596	-0.81674	0.833521
ENSG00000203883	SOX18	-0.788103	0.352538	-0.831531	0.427136	-0.770504	1.87011
ENSG00000203999	LINC01270	-1.39135	1.18851	-0.868406	0.386663	0.0380324	0.572599
ENSG00000204103	MAFB	-0.255756	1.95589	-0.529283	-0.0733317	-0.671021	-0.745097
ENSG00000204136	GGTA1	-0.546536	1.53373	-0.70437	-0.171774	-0.51063	0.297987
ENSG00000204176	SYT15	-0.800845	1.00558	-0.649647	0.719097	-1.1112	0.899474
ENSG00000204248	COL11A2	-1.21716	0.958467	-0.858541	1.03582	-0.707344	0.765496
ENSG00000204257	HLA-DMA	-0.889998	1.24986	-0.649543	0.880079	-0.623274	-0.172673
ENSG00000204282		-1.00901	0.549961	-0.770421	0.77057	-0.778592	1.39318
ENSG00000204323	SMIM5	-0.754714	1.84535	-0.917423	-0.0708436	-0.529425	0.263602
ENSG00000204711	C9orf135	-0.573863	1.97524	-0.434821	-0.221624	-0.62021	-0.311229
ENSG00000205221	VIT	-0.877129	1.08461	-0.983994	0.657153	-0.78553	0.878517
ENSG00000205426	KRT81	-0.666266	1.54631	-0.441802	0.320663	-0.823035	-0.0617573
ENSG00000206013	IFITM5	-0.468208	1.97163	-0.482785	-0.299779	-0.495486	-0.461425
ENSG00000206052	DOK6	-0.51314	1.59686	-0.944739	-0.0301687	-0.751251	0.541672
ENSG00000207652	MIR621	-1.17433	1.48014	-0.68234	0.107136	-0.167465	0.355039
ENSG00000211445	GPX3	-1.16183	0.88939	-1.03689	0.676642	-0.527614	1.20144
ENSG00000211448	DIO2	-0.848458	1.05121	-1.03136	0.567506	-0.8589	1.14955
ENSG00000212766	EWSAT1	-0.36214	1.65892	-0.0497054	-0.0106512	-0.742919	-0.674574
ENSG00000213221	DNLZ	-0.0082732	0.814142	-1.01382	0.106326	-0.985734	1.11187
ENSG00000213362		-0.686591	1.52983	-0.308646	0.312722	-0.53285	-0.522174
ENSG00000213468	FIRRE	0.315008	1.48609	-0.711561	0.293413	-1.3079	-0.337257
ENSG00000213560		-0.901205	0.884412	-0.531767	0.514974	-0.254688	0.207109
ENSG00000213654	GPSM3	-0.638294	1.10043	-0.652711	1.0024	-1.1948	0.293065
ENSG00000213731		0.32048	0.814678	-1.1072	0.633472	-0.980909	0.0569077
ENSG00000214944	ARHGEF28	-0.581172	1.69351	-0.847366	0.316169	-0.977277	0.245727
ENSG00000215018	COL28A1	-0.967332	1.35148	-0.612443	-0.164321	-0.272592	0.682801
ENSG00000215861		-0.924936	1.41245	-1.01485	0.1568	-0.617868	0.979588
ENSG00000218014	KRT19P1	-0.418072	1.52575	-0.678828	0.233818	-0.749943	-0.109906
ENSG00000221930		-0.443829	1.22731	-1.34704	0.0217032	-0.0260438	0.308185
ENSG00000222033	LINC01124	-0.670701	0.483015	-0.862987	0.93843	-0.64034	0.715783
ENSG00000223393		-0.38132	1.7459	-0.730863	-0.291437	-0.426261	-0.131646
ENSG00000223486		-0.760123	1.13377	-0.363882	0.589782	-0.518349	-0.229563
ENSG00000223652		-0.604778	1.32001	-0.809287	0.0809287	-0.616808	0.570146
ENSG00000223764	LINC02593	-0.877801	0.819621	-0.940941	0.913871	-0.915041	1.02007
ENSG00000224809	BEND3P2	-0.866689	0.278546	-0.776276	0.524671	-0.771253	1.88924
ENSG00000225194	LINC00092	-0.930365	0.540775	-0.933918	0.807285	-0.797109	1.4398
ENSG00000225217		-0.510968	1.6381	0.196205	-0.0150285	-1.03446	-0.299735
ENSG00000225581	TRIM53AP	-0.562506	1.97835	-0.562506	-0.351866	-0.523011	-0.158778
ENSG00000225626	C9orf135-DT	-0.607705	1.82052	-0.607705	0.0207762	-0.550571	-0.302987
ENSG00000225764	P3H2-AS1	-0.278238	1.77269	-0.194097	0.116172	-0.783083	-0.909294
ENSG00000225953	SATB2-AS1	-0.224955	1.81571	-0.160682	-0.417774	-0.482047	-0.760563
ENSG00000226268		-0.443011	1.47036	-0.253667	-0.487855	-0.248684	-0.134081
ENSG00000226409		-0.375103	1.40584	-0.974628	0.577082	-1.04516	0.224421
ENSG00000227210	LOC101928222	-0.24938	1.20961	-1.19963	0.617948	-1.08981	0.548472
ENSG00000227295		-0.155674	1.68846	-0.490762	-0.231935	-0.835094	-0.130254
ENSG00000227456	LINC00310	-0.872055	1.24077	-0.711707	0.48619	-0.890919	0.759725
ENSG00000227482		-0.675745	1.72473	-0.65919	-0.22876	-0.3612	0.0471567
ENSG00000227496		-0.921867	1.00723	-0.853581	0.341432	-0.717008	1.24054
ENSG00000227755		-0.939727	0.773205	-0.0486066	1.24847	-0.939727	-0.141019
ENSG00000228203	GRASLND	0.0154585	1.83492	-0.823421	-0.195395	-0.45386	-0.778076
ENSG00000228688	COL11A2P1	-0.787	0.570459	-0.9919	0.980258	-0.68455	0.886345
ENSG00000228695	CES1P1	-0.564265	1.58428	-0.73668	0.569691	-0.842781	-0.259225
ENSG00000228956		-0.803645	1.04474	-0.87508	0.669704	-1.01795	1.01795
ENSG00000228960		-1.0631	0.602313	-0.375211	0.529904	-0.375211	0.783336
ENSG00000229314	ORM1	-1.07273	0.85743	-0.842651	0.704505	-0.332902	0.634242
ENSG00000229498		-0.921299	0.274027	-0.684543	0.533881	-0.800034	1.90244
ENSG00000229989		-0.0837443	1.53268	-0.33287	-0.0802681	-0.716409	-0.536806
ENSG00000230294		-0.962375	1.14247	-0.756018	0.832933	-0.714746	0.358311
ENSG00000230400		-0.832851	0.431675	-1.0307	0.767161	-0.497364	1.20587
ENSG00000230778	ANKRD63	-0.444818	1.65566	-0.561898	0.680189	-1.01862	-0.601311
ENSG00000231107	LINC01508	-1.1704	0.775881	-0.32438	0.289312	-0.618075	1.28875
ENSG00000231789	PIK3CD-AS2	-0.81634	0.500356	-0.697775	1.21799	-0.922424	0.725005
ENSG00000232187		-0.171109	1.74057	-0.587972	-0.0405762	-0.756401	-0.442
ENSG00000232460		-0.501807	1.52792	-0.0892602	-0.155268	-0.650324	-0.204773
ENSG00000232480	TGFB2-AS1	-0.73725	1.63532	-0.388071	0.490659	-0.63319	-0.619315
ENSG00000232756		-0.394651	1.69554	-1.04851	-0.298181	-0.137397	-0.10524
ENSG00000233217	MROH3P	-0.585259	1.55489	-0.747655	0.528315	-0.96805	0.0411263
ENSG00000233251	LOC100129434	-0.672038	1.81655	-0.865886	0.0614408	-0.771582	0.286724
ENSG00000234263	MAP3K5-AS1	-0.889621	0.144093	-0.598649	0.718379	-0.866649	1.79038
ENSG00000234362	LINC01914	-0.683719	1.23069	-1.0433	0.455813	-0.729301	0.678655
ENSG00000234892		-0.62592	1.14633	-0.913454	0.864027	-1.01801	0.424884
ENSG00000235033	DAAM2-AS1	-0.835428	0.498237	-1.12061	0.452943	-0.422747	1.52994
ENSG00000235205		-0.959072	0.285333	-0.622622	0.907536	-0.682537	1.22094
ENSG00000235568	NFAM1	-0.569267	1.17016	-0.544291	1.02565	-1.10448	-0.151805
ENSG00000235641		-0.286652	1.53249	-0.933457	0.0771755	-0.69899	0.101431
ENSG00000235865	GSN-AS1	-1.08539	0.698337	-0.979277	0.968084	-0.562912	0.955123
ENSG00000236044		-0.540097	0.558721	-0.72013	-0.0744962	-0.521473	1.48992
ENSG00000236272	SCUBE1-AS2	-0.714945	0.914331	-0.788053	0.914331	-1.0596	0.715894
ENSG00000236975		-0.844206	-0.0603004	-0.739685	1.09747	-0.723605	1.44721
ENSG00000237264		-0.446635	1.63567	-0.643905	0.326792	-1.09481	0.082552
ENSG00000237396	LNCNEF	-0.629209	1.83399	-0.84816	-0.0879123	-0.753889	0.364182
ENSG00000237424	FOXD2-AS1	-0.612178	0.249326	-1.07059	0.857911	-0.509429	1.08975
ENSG00000237456		-0.750694	1.16266	-0.907343	0.910903	-0.465369	-0.235991
ENSG00000237476	LINC01637	-0.858617	1.43512	-0.109031	0.535614	-0.543791	-0.648733
ENSG00000237807	LOC100507516	-0.210503	1.45972	-1.15949	-0.476221	-0.210503	0.409504
ENSG00000238259		-0.898194	0.501492	-1.09031	0.501492	-0.507105	1.62673
ENSG00000239388	ASB14	-0.703743	1.50887	-0.630583	0.358073	-1.08339	0.524167
ENSG00000240122		-0.334991	0.468631	-0.413393	-0.0997845	-0.727001	1.33759
ENSG00000240687		-0.931671	1.1814	-0.966889	0.705957	-0.826018	0.794002
ENSG00000241935	HOGA1	-0.956095	0.4502	-1.07677	0.603361	-0.334169	1.39237
ENSG00000242960		-0.515492	1.67873	0.209217	0.179746	-0.933439	-0.755276
ENSG00000243244	STON1	-0.755432	1.68101	-0.245912	0.452418	-0.777771	-0.55439
ENSG00000243836	WDR86-AS1	-0.274747	1.19192	0.228956	0.70303	-1.4303	-0.482154
ENSG00000243955	GSTA1	-0.477885	1.97776	-0.461237	-0.390481	-0.461237	-0.402967
ENSG00000243989	ACY1	-0.908265	0.560734	-1.20321	0.397512	0.0624774	1.05326
ENSG00000244062		-0.970627	1.29926	-0.382137	0.682751	-0.774464	0.066237
ENSG00000244300		-1.01171	0.215774	-0.715017	1.14075	-0.819731	1.34824
ENSG00000244586		-0.540446	1.59484	0.279054	-0.0370894	-0.725893	-0.667609
ENSG00000245248		-0.0854853	1.80226	-0.874992	-0.007713	-0.856138	-0.26224
ENSG00000245812	LINC02202	-0.878855	0.785982	-0.708587	-0.216704	-0.481564	1.76344
ENSG00000246090	LOC100507053	-0.95802	1.43424	-0.641259	0.14828	-0.645987	0.669912
ENSG00000247317		-0.565171	1.27811	-0.442285	1.01837	-1.07626	-0.431114
ENSG00000247796	LOC257396	-0.739992	1.1084	-1.01599	0.758545	-0.65836	0.391199
ENSG00000248113		-0.536196	1.52085	-0.175482	-0.623937	-0.467953	0.318468
ENSG00000248491		-1.09549	1.66097	-0.160405	-0.144143	-0.0465693	-0.33929
ENSG00000248550	OTX2-AS1	-0.486566	1.04522	0.108126	0.666776	-0.522608	-1.04522
ENSG00000248890	HHIP-AS1	-0.846503	1.40986	-0.965698	0.276316	-0.0705419	-0.0598143
ENSG00000249242	TMEM150C	0.0520079	1.79927	-0.296505	-0.170627	-0.799078	-0.878926
ENSG00000249307	LINC01088	-0.405126	0.610378	-1.11499	-0.0206148	-0.414986	1.42212
ENSG00000249364	LOC101928858	-0.398584	0.223168	-0.809512	0.137409	-0.827378	1.96336
ENSG00000249915	PDCD6	-0.7204	1.42061	-0.962148	0.647815	-0.942353	0.421259
ENSG00000250007	LOC101928174	-0.754645	0.388619	-0.655231	0.997532	-0.891339	1.00167
ENSG00000250722	SELENOP	-0.751918	1.72941	-0.802856	0.241378	-0.887541	0.361083
ENSG00000250934		-0.658868	1.24253	-0.959305	0.217752	-0.794682	0.950326
ENSG00000253456		-0.886839	0.446375	-0.583343	-0.106421	-0.301525	1.71455
ENSG00000253688		-1.24982	0.117591	-0.0918329	0.487162	0.0436766	0.893691
ENSG00000253958	CLDN23	-1.41887	0.847183	-0.191283	0.694301	-0.776764	1.06348
ENSG00000254109	RBPMS-AS1	-0.569423	1.50565	-0.671896	-0.0314406	-0.91527	0.68587
ENSG00000254343		-0.413645	1.60862	-0.738652	0.272481	-0.684484	-0.30531
ENSG00000254366		-0.577646	1.9081	-0.410949	-0.195223	-0.548229	-0.371726
ENSG00000255008		-0.863714	0.944141	-0.568816	0.213306	-0.209809	0.456917
ENSG00000255020	LOC100129129	-0.746548	1.80047	-0.663799	0.132248	-0.766408	0.104114
ENSG00000255122		-0.98745	1.21187	0.388995	0	-0.359073	-0.209459
ENSG00000255433	LINC02735	-0.591977	1.0618	-0.695338	0.544995	-0.716011	0.296928
ENSG00000255471		-0.523482	1.34125	-0.409111	0.893716	-1.00831	-0.528454
ENSG00000256124	LINC01152	-1.02636	0.654954	-0.704236	1.21277	-0.759232	0.59472
ENSG00000256258		-0.796223	0.86704	-0.585683	1.05653	-0.880438	0.256476
ENSG00000256321	LOC101928441	0.346372	1.69968	-1.06246	-0.278234	-0.861199	-0.146372
ENSG00000256616	LOC100996333	-1.26615	0.362529	-0.479764	0.638484	-0.595197	1.62687
ENSG00000256995		-0.184932	1.71176	-0.871355	-0.209944	-0.801879	0.18468
ENSG00000257671	KRT7-AS	-0.703977	-0.135124	-0.373675	0.782382	-0.942529	1.706
ENSG00000258376		-0.659027	1.39149	-0.728068	0.604422	-0.679739	-0.148124
ENSG00000259038		-1.23498	0.546196	-0.464025	0.439857	-0.0918383	0.918383
ENSG00000259172		-0.883129	0.709502	-0.883129	1.2042	-1.04803	0.906406
ENSG00000259207	ITGB3	-0.126163	1.56474	-0.856213	0.572189	-1.19598	-0.230173
ENSG00000259376		-0.668276	0.814828	-0.920834	0.315086	-0.636035	1.15336
ENSG00000259417	CTXND1	-0.791763	1.46147	-0.56605	-0.0095521	-0.37147	0.181136
ENSG00000259459		-0.30992	2.00799	-0.428787	-0.538145	-0.45256	-0.514371
ENSG00000259660		-0.784808	0.247385	-1.31446	0.622728	-0.115446	1.35465
ENSG00000259755		-0.597364	0.792326	-1.07203	0.809483	-0.683148	0.643635
ENSG00000259764	PCSK6-AS1	-0.859025	0.228951	-0.865741	1.27663	-0.758286	1.01471
ENSG00000260086		-0.964001	0.214222	-1.05641	1.35779	0.00630066	0.237325
ENSG00000260244		-0.175308	1.59238	-0.777929	0.0456531	-0.878365	-0.0012174
ENSG00000260423	LINC02367	-0.857446	-0.189967	-0.792302	1.05179	-0.643973	1.6451
ENSG00000260460		-0.797172	1.2515	-1.01693	0.259065	-0.506529	0.741105
ENSG00000261786		-0.509684	1.06834	0.327375	0.575205	-0.919362	-0.613368
ENSG00000262943	ALOX12P2	-0.377884	1.05233	-1.23851	-0.110054	-0.69928	1.41836
ENSG00000263400	TMEM220-AS1	-0.600954	1.53773	-0.489853	0.232302	-0.823155	0.0286168
ENSG00000263426	RN7SL471P	-0.765644	1.44495	-0.617944	0.691584	-1.04748	0.186739
ENSG00000264755	MIR3131	-0.533155	2.01179	-0.545075	-0.264952	-0.545075	-0.346406
ENSG00000266524	GDF10	-0.818996	0.347743	-1.09122	0.366128	-0.417612	1.7882
ENSG00000267280	TBX2-AS1	-0.386272	1.82675	-0.393649	-0.153905	-0.773551	-0.290375
ENSG00000267653		-0.0204362	1.9428	-0.644875	-0.544965	-0.455046	-0.584929
ENSG00000268926		-0.716167	1.90238	-0.782741	-0.0948165	-0.0504343	-0.605212
ENSG00000269190	FBXO17	-1.41256	1.42838	-0.576672	0.444854	-0.239562	0.28186
ENSG00000271824	SMIM32	-0.903728	1.16387	-0.660231	0.865326	-1.14511	0.686409
ENSG00000271857		-0.117646	1.52003	-0.403953	0.0884949	-1.09109	-0.129098
ENSG00000272549	LINC02538	-0.760394	1.05794	-0.744582	0.852389	-0.744582	0.204113
ENSG00000272841		-0.834927	1.44637	-0.771994	-0.0895713	-0.773961	1.10811
ENSG00000272944		-0.654956	1.63505	-1.14383	-0.0502913	-0.384787	0.417145
ENSG00000274286	ADRA2B	-0.580264	1.28037	-0.93487	0.460518	-1.07448	0.820011
ENSG00000274588	DGKK	0.68589	1.38371	-0.528525	0.313025	-1.3607	-0.834039
ENSG00000274642		-0.653001	1.35709	-1.09248	0.254782	-0.76107	0.82875
ENSG00000275088		-0.883263	0.940335	-0.654067	0.372329	-0.943053	1.33894
ENSG00000275325	PDCD6IPP1	-0.678728	0.636868	-0.273086	0.505308	-0.974737	0.954803
ENSG00000277013		-1.2947	0.379931	-0.268867	0.916108	-0.52349	0.965074
ENSG00000277463		-0.503983	1.8281	-0.578992	-0.258501	-0.381242	-0.333509
ENSG00000277758	LOC102724488	-0.838388	0.735472	-0.815379	0.5629	-0.900514	1.40275
ENSG00000278716		-0.585105	0.342295	-0.937517	0.601967	-0.900421	1.6592

## Sheet: Cluster 2
Ensembl Gene ID	symbol	WT_TGFβ3	WT_BMP4	V620I_TGFβ3	V620I_BMP4	T89I_TGFβ3	T89I_BMP4
ENSG00000003436	TFPI	1.10885	1.01247	-0.71978	-0.0760455	-1.3529	-0.203378
ENSG00000004948	CALCR	0.596658	1.42061	-0.918664	-0.55404	-0.880781	0.142061
ENSG00000006555	TTC22	0.48699	0.915541	-1.23198	0.729835	-1.04151	-0.2225
ENSG00000012124	CD22	-0.854812	0.391239	-0.783085	1.74238	-0.844804	0.204415
ENSG00000026559	KCNG1	0.992675	0.614004	-0.733497	0.44505	-1.46307	-0.0513774
ENSG00000042980	ADAM28	0.441922	-0.148586	-0.384086	1.12733	-1.20306	0.0939444
ENSG00000047662	FAM184B	0.751581	0.748542	-0.549317	0.705989	-1.03563	-1.01132
ENSG00000060140	STYK1	0.290034	0.250154	-0.560732	1.08763	-1.30515	0.130515
ENSG00000061656	SPAG4	-0.017932	-0.389093	-1.26175	1.26246	-0.0862117	0.236123
ENSG00000064225	ST3GAL6	0.434827	0.987456	-0.556094	-0.241667	-1.24212	0.638093
ENSG00000064270	ATP2C2	0.128442	-0.428925	-0.420283	1.42464	-0.895557	0.11548
ENSG00000066056	TIE1	-0.104406	-0.48475	0.356159	1.55255	-1.24211	0.0154555
ENSG00000076944	STXBP2	-0.47293	0.870732	-0.461039	1.06693	-1.49257	0.498153
ENSG00000082293	COL19A1	-0.638469	0.80346	-0.468634	1.3779	-1.30948	0.157422
ENSG00000088340	FER1L4	-0.323624	-0.437817	-0.625759	1.66959	-0.392413	-0.061882
ENSG00000090339	ICAM1	-0.456962	-0.500793	-0.303786	1.7335	-0.741265	0.257814
ENSG00000095203	EPB41L4B	0.60112	0.456344	-0.331126	0.648476	-1.66387	0.275037
ENSG00000099715	PCDH11Y	0.834323	1.27294	-0.882552	0.0740523	-1.04964	-0.626343
ENSG00000100191	SLC5A4	0.755725	-0.644203	0.0725986	0.409351	-1.20706	0.842318
ENSG00000101115	SALL4	-0.166794	0.478926	-0.107418	1.43637	-1.28901	-0.50524
ENSG00000104892	KLC3	-0.0544992	0.136643	-0.410719	1.46595	-1.27955	0.0526563
ENSG00000105695	MAG	-0.717734	0.0674904	-0.789118	1.83782	-0.60352	0.0103831
ENSG00000105707	HPN	-0.456126	0.507478	-1.021	1.50431	-0.755175	-0.0463174
ENSG00000105963	ADAP1	0.291855	0.738176	-0.949653	0.766425	-1.51179	0.5701
ENSG00000106852	LHX6	0.801345	1.17389	-0.225385	-0.140009	-1.09799	-0.757599
ENSG00000110455	ACCS	-0.755783	0.912336	-0.786038	1.37597	-0.849001	-0.125332
ENSG00000110975	SYT10	0.206218	0.236872	-0.958633	0.987894	-0.345554	-0.488606
ENSG00000111181	SLC6A12	1.10832	0.633798	-1.08177	0.402622	-0.789759	-0.724868
ENSG00000111452	ADGRD1	-0.764871	1.03402	-0.900905	1.27526	-0.982829	0.152131
ENSG00000115232	ITGA4	-0.425489	0.025828	-0.514765	1.17706	-1.10764	0.955096
ENSG00000115297	TLX2	-0.279631	0.0268281	-0.631492	1.51372	-0.869849	0.110064
ENSG00000115602	IL1RL1	0.088899	0.349669	-0.845528	0.25188	-1.01937	1.2841
ENSG00000117983	MUC5B	0.186409	0.488091	-0.874192	1.18573	-1.12874	-0.101132
ENSG00000119535	CSF3R	0.627806	-0.237394	0.0143008	0.0614935	-1.0554	0.790358
ENSG00000120262	CCDC170	-0.958566	-0.0065565	-0.667674	1.7424	-0.533047	0.342033
ENSG00000124143	ARHGAP40	-0.430629	0.527708	-0.686186	1.43813	-0.930334	-0.120311
ENSG00000124731	TREM1	-0.0396433	-1.01776	-0.70123	1.06074	-0.002964	0.700736
ENSG00000128016	ZFP36	-0.422835	-0.814235	0.865686	0.952527	-0.930316	0.754126
ENSG00000129422	MTUS1	-0.401657	0.49892	-0.654169	0.567521	-1.30369	1.50605
ENSG00000130208	APOC1	0.270918	0.440517	-0.649762	1.20371	-1.41296	-0.0198232
ENSG00000130270	ATP8B3	-0.788889	-0.137823	-0.794314	1.69679	-0.492421	0.424109
ENSG00000130433	CACNG6	-0.718046	-0.0329715	-0.812076	1.59912	-0.46618	0.302849
ENSG00000131379	C3orf20	0.572687	-0.180425	-0.458042	1.31694	-1.21706	-0.198145
ENSG00000134061	CD180	-0.462294	-0.528829	-0.357738	-0.348233	-0.15813	2.35439
ENSG00000134762	DSC3	0.822846	0.997592	-0.532347	0.140244	-1.4079	-0.204698
ENSG00000135898	GPR55	0.363264	0.74548	-0.783386	0.224276	-1.1656	0.560163
ENSG00000136883	KIF12	-0.354265	0.39841	-0.758928	1.60633	-0.633483	-0.597063
ENSG00000137265	IRF4	-0.837468	-0.667961	0.0590557	1.1197	-0.511192	1.13684
ENSG00000137672	TRPC6	-0.708901	0.0896051	-0.78792	1.44956	-0.446891	0.276755
ENSG00000138378	STAT4	-0.234909	-0.0691214	-0.497882	1.49728	-1.13245	0.416807
ENSG00000139132	FGD4	0.797063	0.869067	0.0209127	-0.0791452	-1.48089	-0.162371
ENSG00000139194	RBP5	-0.368128	-0.612489	-0.717215	1.35237	-0.0539498	0.293475
ENSG00000139985	ADAM21	0.99272	-0.504239	0.210099	0.646056	-1.43393	0.189089
ENSG00000140795	MYLK3	-0.501072	0.310293	-0.256035	1.56089	-1.26668	0.118128
ENSG00000142319	SLC6A3	0.495233	0.347558	-0.06265	0.872625	-1.37532	-0.390817
ENSG00000143507	DUSP10	0.962738	1.27481	-0.710765	-0.29626	-1.23485	-0.231147
ENSG00000146755	TRIM50	-0.81159	0.282636	-0.765274	1.63739	-0.603166	0.0915802
ENSG00000148680	HTR7	0.365761	-0.0299804	-0.550307	0.431718	-1.37111	1.35512
ENSG00000149295	DRD2	0.513554	0.447447	-0.768509	0.982308	-0.862661	-0.672355
ENSG00000152402	GUCY1A2	0.547323	0.15985	-0.305418	0.699139	-1.30847	0.174956
ENSG00000152779	SLC16A12	-1.00779	0.604152	-0.759001	1.53412	-0.79318	0.309266
ENSG00000153563	CD8A	1.05486	0.124064	-0.825398	0.802918	-0.918711	-0.592115
ENSG00000155657	TTN	1.51674	0.624556	-0.43348	-0.139523	-1.15065	-0.701356
ENSG00000158050	DUSP2	1.08369	0.755307	0.192298	-0.328344	-1.53717	-0.156943
ENSG00000158286	RNF207	0.201365	0.21168	-0.943533	1.1374	-0.640548	-0.269659
ENSG00000160401	CFAP157	-0.441935	-0.688941	-0.335075	1.39222	0.304338	-0.419162
ENSG00000162391	FAM151A	-0.155034	-0.997572	-0.37159	1.50974	-0.530624	0.602911
ENSG00000163075	CFAP221	-0.10189	0.576121	-0.435515	0.709879	-1.29648	0.585346
ENSG00000163219	ARHGAP25	0.132876	-0.194531	0.370636	1.38404	-1.36384	-0.315359
ENSG00000164114	MAP9	0.848072	-0.0585033	0.132297	0.13919	-1.37701	0.465369
ENSG00000164236	ANKRD33B	0.258725	0.0661041	-0.0414428	1.20739	-1.56636	0.0869714
ENSG00000164418	GRIK2	0.87884	1.14229	-0.793704	0.150831	-1.14765	-0.572039
ENSG00000164627	KIF6	0.84826	0.526023	-0.197842	-0.0483992	-1.33735	0.213126
ENSG00000166183	ASPG	-0.643738	0.0234981	-0.635723	1.67055	-0.860139	0.382163
ENSG00000170209	ANKK1	0.346467	0.220479	-0.797925	1.19689	-0.944911	-0.293972
ENSG00000171658	NMRAL2P	0.109667	0.57497	-0.0971339	-0.510737	-0.993273	1.18963
ENSG00000174567	GOLT1A	-0.228492	-0.0430764	0.169808	1.35784	-1.13497	-0.104882
ENSG00000176928	GCNT4	-0.216355	0.0280676	-0.941045	1.27591	-0.923892	0.722741
ENSG00000177301	KCNA2	0.976989	0.996672	-0.925694	-0.0465233	-1.23734	0.00596452
ENSG00000179399	GPC5	0.366897	1.01704	-0.661658	0.416908	-1.57352	0.358562
ENSG00000180264	ADGRD2	0.974771	1.06595	-0.733289	0.0447599	-1.15878	-0.502305
ENSG00000180535	BHLHA15	0.123287	0.249708	-0.750168	1.13466	-1.25585	0.414438
ENSG00000182601	HS3ST4	0.601464	1.29912	-0.712454	0.171243	-1.06128	-0.634937
ENSG00000185101	ANO9	-0.264439	-0.340432	-0.381243	1.71559	-0.889268	0.0859715
ENSG00000185198	PRSS57	-0.61747	0.211078	-0.113276	1.70439	-1.03174	-0.241733
ENSG00000185352	HS6ST3	0.247085	1.39244	-0.816455	-0.346801	-0.940686	0.347076
ENSG00000185736	ADARB2	1.22365	0.940675	-0.853306	-0.13429	-1.01526	-0.49973
ENSG00000186377	CYP4X1	0.28902	0.466036	-0.596063	0.317342	-1.22624	0.801187
ENSG00000186710	CFAP73	-0.591478	-0.154491	-0.915172	1.77149	0.0882803	-0.569898
ENSG00000187595	ZNF385C	-0.622218	0.955028	-0.944679	1.33635	-1.12149	0.214449
ENSG00000187959	CPSF4L	-0.119827	1.25436	-0.858338	-0.0076486	-1.01726	0.712166
ENSG00000189275	LINC01164	-0.513204	0.30483	-0.240526	1.59263	-0.812879	-0.521303
ENSG00000189292	ALKAL2	1.12221	0.0224097	-0.145089	0.349505	-1.59885	0.284718
ENSG00000196549	MME	0.668114	0.572476	-0.487689	0.892863	-1.32966	-0.584036
ENSG00000198088	NUP62CL	-0.50556	0.339997	-0.635646	1.21808	-0.830775	0.339997
ENSG00000198336	MYL4	-0.835092	0.509628	-0.707023	1.22565	-0.747772	0.503807
ENSG00000198417	MT1F	0.876481	-0.712141	-1.25994	0.739531	0.465631	-0.566061
ENSG00000198711	SSBP3-AS1	0.470576	0.00765164	-0.174712	0.744122	-1.42321	0.44252
ENSG00000204334	ERICH2	0.753068	0.429574	-0.305988	0.614428	-1.40741	-0.213562
ENSG00000204442	FAM155A	0.869726	0.90022	-0.189338	0.122152	-1.37988	-0.493614
ENSG00000205517	RGL3	-0.978002	0.123824	-0.664083	1.73237	-0.566536	0.24854
ENSG00000205879		0.571202	1.1949	-1.0997	0.0283501	-0.941853	-0.0371001
ENSG00000205913	SRRM2-AS1	0.106851	0.417484	-1.35956	0.711325	-0.472436	0.341925
ENSG00000207197	SNORD116-12	0.647177	-0.238736	-0.122724	0.837016	-1.28285	0.172581
ENSG00000212237	RNA5SP18	0.549097	-1.20705	-0.364452	-0.169325	1.00144	0.132235
ENSG00000214629	RPSAP6	0.47607	1.12827	-0.924238	-0.367952	-1.03933	0.661499
ENSG00000214776		-0.241091	-0.465091	-0.385091	1.46691	-1.09109	0.825576
ENSG00000214946	TBC1D26	0.704732	-0.184265	0.159481	0.918092	-1.33996	-0.290945
ENSG00000219438	TAFA5	-0.325878	-0.367583	-0.534566	1.34134	-0.991193	0.992323
ENSG00000223774		-0.0931263	0.599843	-1.01709	1.29281	-0.514934	-0.695708
ENSG00000227507	LTB	-0.0237062	-0.15409	-0.666935	1.59306	-0.658243	-0.342423
ENSG00000228060		0.889926	-1.20776	-0.234322	0.149567	0.231829	0.149567
ENSG00000228363		0.792809	-1.0382	0.591461	0.547416	-1.13258	0.515955
ENSG00000228510		-0.746433	-0.018711	-0.984107	0.988339	0.407632	0.143005
ENSG00000229644	NAMPTP1	-0.0094374	-0.220905	0.20203	-0.0094374	-0.689978	1.03765
ENSG00000230815		-0.448938	-0.868534	0.185835	-0.158449	-0.255279	2.12243
ENSG00000231104		0.29347	-1.04719	0.463993	0.152348	-0.817868	1.42833
ENSG00000232456		0.21548	-0.801725	0.225076	1.15592	-1.08002	0.455387
ENSG00000232903	LINC01166	0.378138	0.110029	-0.860269	0.508362	-1.34542	1.32545
ENSG00000234928	LINC01659	-0.605667	0.472064	-0.363061	1.47981	-1.2565	0.243454
ENSG00000234964		-0.338383	0.879378	-0.391995	0.00626635	-1.02768	1.03256
ENSG00000235258	NDUFB4P6	1.03346	-0.918281	0.576909	0.14319	-1.12373	0.576909
ENSG00000236047	RPL13AP12	0.565518	-0.277286	-0.598354	0.926719	-1.34082	0.766185
ENSG00000237330	RNF223	0.370086	-0.46498	-0.525079	1.32851	-0.863534	0.0316313
ENSG00000237595	LINC01275	0.305074	0.377502	-1.45733	0.522357	0.136076	-0.33068
ENSG00000238164		0.266709	0.211092	0.243535	0.892401	-1.48523	-0.0901671
ENSG00000241975		0.983817	-1.21313	0.658344	0.0887655	-0.928339	0.766835
ENSG00000242902	FLNC-AS1	0.0609142	-0.284266	0.0135365	0.852799	-1.05585	0.554996
ENSG00000243175	RPSAP36	0.137416	-0.890453	-0.0641273	0.590887	-0.769527	1.30636
ENSG00000245532	NEAT1	-0.294976	-0.597522	0.250514	1.47765	-0.898341	0.167066
ENSG00000246082	NUDT16L2P	-0.806244	0.807957	-0.479635	1.5177	-1.08261	-0.102779
ENSG00000247934		0.0703503	0.267093	-0.983315	1.22457	-0.926478	0.135931
ENSG00000248197	LINC00290	-0.307521	-0.221882	-1.22576	1.50517	-0.521618	0.620233
ENSG00000248456		-0.793508	0.879151	-0.485893	1.37903	-0.947316	-0.203912
ENSG00000250250	CTD-2350J17.1	0.240008	-0.993946	-0.142613	-0.104351	-0.391317	1.80875
ENSG00000250326	LOC105377623	-0.0670882	0.34802	0.10203	0.809252	-1.54303	0.501764
ENSG00000250986		0.49358	0.569359	-0.393486	0.551529	-1.68397	0.486151
ENSG00000251451	GTF2IP9	-0.22804	-0.187581	0.230492	0.742968	-1.15859	0.877831
ENSG00000253483		0.613152	0.735782	0.0272512	-0.613151	-1.30806	0.735782
ENSG00000256151		-0.709262	0.615938	-0.808807	1.51185	-0.821251	0.0124432
ENSG00000258913	LINC02691	-0.326174	0.279578	-0.96299	1.16491	-0.512559	0.155321
ENSG00000261386		0.92759	0.208348	-0.31991	0.293682	-1.51052	0.427778
ENSG00000261997		-0.33395	-0.761681	-0.149439	0.647314	-0.484914	1.39375
ENSG00000262691		-0.0549833	-0.239504	-0.728141	1.36992	-0.260006	-0.3591
ENSG00000264895		0.728683	-1.03264	0.156502	0.101771	-0.52514	0.813266
ENSG00000264943		-0.317871	-0.530371	1.22758	-0.0184401	-0.75253	0.931369
ENSG00000267221	C17orf113	0.788867	0.664369	-0.792263	0.670594	-1.09106	-0.584765
ENSG00000267529		-0.444944	-0.880938	-0.473073	0.398915	-0.149593	1.90849
ENSG00000270116		0.371693	-1.1883	0.830515	0.320712	-0.576541	0.599405
ENSG00000270124		0.753184	0.20904	-1.01382	0.805843	-1.16009	0.203189
ENSG00000271662		1.19329	-1.21543	-0.385462	0.191911	-0.105797	0.300168
ENSG00000272645		-0.461779	0.224362	-0.757866	1.61792	-0.844742	0.0435185
ENSG00000275830		0.39014	1.33159	-0.608366	-0.404589	-1.11373	0.337158
ENSG00000276916		0.130136	0.576763	-0.240144	0.244656	-1.28991	0.691282
ENSG00000276997		0.137056	0.27665	-1.09137	1.30964	-0.560913	-0.458545
ENSG00000277010		-0.205416	0.612706	-0.98458	1.35291	-0.594998	-0.569025

## Sheet: Cluster 3
Ensembl Gene ID	symbol	WT_TGFβ3	WT_BMP4	V620I_TGFβ3	V620I_BMP4	T89I_TGFβ3	T89I_BMP4
ENSG00000005243	COPZ2	-1.38411	0.724869	-0.945663	0.355272	0.182428	1.10772
ENSG00000006042	TMEM98	-1.59678	0.759379	-0.82065	0.658775	0.254819	0.719055
ENSG00000021826	CPS1	-1.66409	0.774993	-0.143334	0.54017	0.0020331	0.605864
ENSG00000038002	AGA	-1.41261	0.45373	-0.831642	0.0686708	1.15568	0.477681
ENSG00000050327	ARHGEF5	-1.51579	-0.343461	-0.561887	0.465395	0.728188	1.44945
ENSG00000054598	FOXC1	-1.47943	0.979446	-0.708527	-0.250417	0.508486	1.03108
ENSG00000065371	ROPN1	-0.890695	0.868381	-1.25206	0.213841	0.172932	0.766109
ENSG00000066468	FGFR2	-1.67539	0.0610104	-0.330088	0.81486	0.158833	1.18434
ENSG00000071991	CDH19	-1.30374	-0.245036	-0.6757	0.0682676	1.1916	1.06091
ENSG00000075290	WNT8B	-0.374816	-0.412461	1.19968	0.811885	-0.255609	-0.891683
ENSG00000079257	LXN	-1.4648	0.15794	-0.525077	0.73094	0.18086	1.05182
ENSG00000080166	DCT	-0.45195	0.494867	1.38366	-0.254147	-0.318763	-0.677006
ENSG00000085491	SLC25A24	-1.45757	0.694535	-0.326355	0.155561	-0.077362	1.23947
ENSG00000091137	SLC26A4	-1.21732	0.62965	0.12593	-0.230872	0.650638	0.0979456
ENSG00000092820	EZR	-1.12537	0.99493	-0.862169	-0.609621	1.06367	0.430692
ENSG00000099994	SUSD2	-1.20107	0.957918	-0.815019	0.0882032	0.0401285	0.968116
ENSG00000100234	TIMP3	-1.53755	0.230784	0.709629	-0.362704	1.23808	-0.134436
ENSG00000101160	CTSZ	-1.64807	0.670896	-0.439753	0.150107	0.866568	0.387088
ENSG00000101335	MYL9	-1.40304	-0.153786	-0.711914	0.614121	0.401293	1.4338
ENSG00000101825	MXRA5	-0.932406	-0.279602	-0.0450901	-0.151768	1.64126	-0.324895
ENSG00000103490	PYCARD	-1.29186	0.46937	-1.10689	0.984069	-0.0855394	1.00551
ENSG00000103522	IL21R	-0.850552	1.05809	-0.945361	-0.858037	1.16288	0.262197
ENSG00000104361	NIPAL2	-1.44964	0.24363	-0.916746	0.532951	0.349344	1.34837
ENSG00000105971	CAV2	-1.52909	0.519886	-0.781378	0.213927	0.750439	0.841157
ENSG00000106511	MEOX2	-1.4525	-0.459669	0.184799	0.911234	0.0567251	1.07414
ENSG00000106819	ASPN	-0.652216	1.39827	-0.645955	-0.259141	0.741056	-0.991335
ENSG00000106823	ECM2	-0.504907	1.52601	-1.25693	-0.262687	0.304045	-0.159692
ENSG00000107984	DKK1	-0.894962	0.665511	-0.496343	-0.732492	1.52132	-0.249488
ENSG00000108691	CCL2	-0.464648	-0.980995	1.13754	0.380068	0.858344	-0.861228
ENSG00000108798	ABI3	-1.04226	0.511269	-0.953147	-0.336108	1.31325	0.358271
ENSG00000109667	SLC2A9	-1.29722	0.957592	-0.350347	-0.0150723	-0.44614	1.41813
ENSG00000109854	HTATIP2	-1.72387	0.188713	-0.542148	0.210602	0.780636	1.26737
ENSG00000110057	UNC93B1	-1.33226	1.29162	-0.300992	0.130369	0.206072	-0.0934053
ENSG00000111199	TRPV4	-1.01115	1.03936	-1.50838	0.710233	0.207689	0.246862
ENSG00000111335	OAS2	-0.55236	0.653846	1.19416	-0.168724	-0.497061	-0.441763
ENSG00000111816	FRK	-0.929021	0.653312	-1.1356	-0.25653	0.903848	0.640126
ENSG00000112414	ADGRG6	-1.34878	-0.880496	-0.0841949	0.572565	0.568883	1.53463
ENSG00000112699	GMDS	-1.50765	0.624884	-0.787616	0.119524	0.846239	0.676951
ENSG00000112773	TENT5A	-1.30527	0.571894	-0.841058	-0.494005	1.21372	0.859277
ENSG00000112837	TBX18	-0.870205	1.40903	-0.739989	-0.167036	0.498415	-0.420285
ENSG00000112936	C7	-0.916	0.620411	-0.682	-0.497743	0.693974	0.814477
ENSG00000114021	NIT2	-1.45581	1.09691	-0.554916	-0.2578	0.473476	0.745879
ENSG00000114378	HYAL1	-1.08791	-0.22332	-1.03898	0.119849	1.10455	1.15476
ENSG00000114450	GNB4	-1.38128	0.452483	-0.332717	0.187435	-0.222524	1.6179
ENSG00000115129	TP53I3	-0.988539	0.308107	-0.883415	-0.699803	1.39593	0.862493
ENSG00000115935	WIPF1	-1.71987	0.986327	-0.177066	0.179642	0.189673	0.662703
ENSG00000116455	WDR77	-1.23643	-0.336699	-0.54942	0.157859	0.34689	1.97393
ENSG00000116661	FBXO2	-1.25621	0.491802	-1.03791	0.260841	0.17692	1.47345
ENSG00000119917	IFIT3	-0.764235	0.401148	1.06957	0.0565111	-0.575323	0.106292
ENSG00000124134	KCNS1	-1.28029	0.325691	-0.720477	-0.384389	1.20851	0.894447
ENSG00000124145	SDC4	-1.54275	1.1411	-0.678634	-0.0267247	0.336753	0.800795
ENSG00000125864	BFSP1	-1.15038	-0.167217	-0.691946	-0.273941	1.62285	0.650197
ENSG00000125868	DSTN	-1.38414	0.905456	-0.845674	0.0442469	0.0699337	1.33168
ENSG00000125968	ID1	-1.55101	0.0688018	-0.540574	0.791658	0.0489744	1.39601
ENSG00000126709	IFI6	-0.558064	0.896409	0.915713	-0.510463	-0.380382	-0.179045
ENSG00000127083	OMD	-1.27214	0.552924	-0.463957	-0.404971	0.573919	1.19764
ENSG00000130052	STARD8	-1.70187	0.0254158	0.146058	0.874972	0.11644	0.767332
ENSG00000130303	BST2	0.14061	0.00502517	1.47455	-0.610321	-0.257801	-0.51124
ENSG00000131724	IL13RA1	-1.58324	0.0608959	-0.0055664	0.469657	0.0173803	1.38598
ENSG00000132530	XAF1	-1.05982	-0.336384	0.762613	0.00754707	0.663783	0.203891
ENSG00000133106	EPSTI1	-0.753912	0.364346	1.46126	-0.250269	-0.292951	-0.217547
ENSG00000134294	SLC38A2	-1.40613	1.40901	-0.651237	-0.176184	0.128829	0.710531
ENSG00000134326	CMPK2	-0.895356	0.270778	0.90021	0.405656	-0.726758	0.360697
ENSG00000135272	MDFIC	-1.52152	0.860055	-0.586604	0.0301265	0.10597	1.2871
ENSG00000135899	SP110	-1.26753	0.269608	-0.130794	-0.018817	0.137272	1.30341
ENSG00000136068	FLNB	-1.63052	0.345826	-0.314432	0.585609	0.138663	1.06167
ENSG00000136541	ERMN	-0.845863	1.11849	-1.13118	0.428809	0.465756	-0.425077
ENSG00000136542	GALNT5	-1.40295	-0.0498975	0.013594	0.497968	-0.1997	1.52585
ENSG00000136943	CTSV	-0.890769	-0.641675	-0.737899	0.301156	0.415227	1.82598
ENSG00000137573	SULF1	-0.873264	-0.19721	-1.24837	0.801327	0.490897	0.952701
ENSG00000137965	IFI44	-0.27091	0.382769	1.39991	-0.534579	-0.265417	-0.482394
ENSG00000139173	TMEM117	-1.46251	0.66271	-0.297419	-0.106484	0.520094	0.812341
ENSG00000139921	TMX1	-1.29658	1.20862	-0.615097	-0.365318	0.448993	0.620807
ENSG00000141371	C17orf64	-0.967434	0.236681	-0.891499	0.334312	0.366856	0.930946
ENSG00000144843	ADPRH	-1.3915	0.881177	-0.884507	0.402025	0.239376	0.709737
ENSG00000146038	DCDC2	0.146402	-0.768809	0.774143	0.441205	0.392805	-1.05628
ENSG00000146242	TPBG	-1.37207	-0.45708	1.21454	0.838073	0.263348	-0.244238
ENSG00000147883	CDKN2B	-0.72282	0.0688135	-1.2431	-0.0923697	0.695184	1.31135
ENSG00000148935	GAS2	-1.20258	0.524953	-0.967643	-0.0481033	0.524953	1.23535
ENSG00000153029	MR1	-1.45315	-0.197971	-0.596509	0.313399	0.560367	1.63298
ENSG00000153976	HS3ST3A1	-1.38648	0.637271	-1.07894	0.812924	0.00895279	0.98205
ENSG00000155363	MOV10	-1.36665	0.282554	-0.964015	0.97481	-0.0971377	1.23925
ENSG00000155918	RAET1L	-0.67348	-1.16917	-0.481213	0.344933	0.642346	1.6217
ENSG00000157322	CLEC18A	-1.01858	-0.550801	-0.939501	0.685805	0.744558	1.12486
ENSG00000157399	ARSL	-1.59276	0.996367	-0.384195	-0.113918	0.696912	0.402065
ENSG00000157601	MX1	-0.422081	0.120288	1.58116	-0.28758	-0.27579	-0.427612
ENSG00000157765	SLC34A2	-0.411827	-0.666067	1.17525	0.027315	0.974937	-1.07439
ENSG00000158234	FAIM	-0.943295	1.38474	-0.978952	-0.428142	0.179907	0.721333
ENSG00000160606	TLCD1	-1.12818	0.471486	-0.855162	-0.459927	0.909102	1.13185
ENSG00000162078	ZG16B	-0.85518	-0.180038	-0.930196	0.123776	0.123776	1.98042
ENSG00000163382	NAXE	-1.32589	0.961786	-1.10511	-0.148812	0.595246	0.99533
ENSG00000163633	C4orf36	-1.22584	0.475698	-0.530586	0.832472	-0.118925	0.579376
ENSG00000164125	GASK1B	-1.21412	-0.0039623	-0.259537	-0.207487	1.75765	-0.183231
ENSG00000164695	CHMP4C	-1.61441	0.0329137	0.439214	0.485476	0.443237	0.431169
ENSG00000164749	HNF4G	-1.40838	1.00286	0.400046	-0.202763	-0.0520608	0.480421
ENSG00000164761	TNFRSF11B	-1.44697	0.792077	-1.09027	0.686092	0.27707	0.679254
ENSG00000165694	FRMD7	-0.951214	0.839306	-1.38952	0.545549	0.26578	0.456956
ENSG00000165949	IFI27	-0.212416	-0.184069	1.18737	-0.625467	0.237081	-0.140874
ENSG00000166387	PPFIBP2	-1.80536	0.691761	0.571062	0.255905	0.639458	-0.280085
ENSG00000166825	ANPEP	-0.998506	1.06238	-0.931405	0.140892	0.648051	-0.205683
ENSG00000167157	PRRX2	-1.42709	-0.620814	-0.105668	0.231168	0.72926	1.55564
ENSG00000168140	VASN	-1.49694	0.733501	-0.976758	0.397488	0.605644	0.65717
ENSG00000168938	PPIC	-1.23063	1.41152	-0.900951	-0.0788131	0.215923	0.476952
ENSG00000169504	CLIC4	-1.48595	0.130926	-0.311989	0.228359	0.118677	1.65598
ENSG00000170006	TMEM154	-1.25736	-0.0147801	-0.592328	0.101349	0.159413	1.94083
ENSG00000170190	SLC16A5	-1.40799	0.12451	-0.721521	0.911691	0.14544	1.02332
ENSG00000171428	NAT1	-0.928964	-0.097933	-0.860566	0.291933	0.127779	1.67015
ENSG00000172061	LRRC15	-0.789367	0.910895	-0.625066	-0.542916	1.29426	-0.538767
ENSG00000172817	CYP7B1	-1.47867	0.324612	-0.379981	0.647053	0.0340173	1.01063
ENSG00000172819	RARG	-1.4302	-0.254417	-0.738348	0.61548	0.518977	1.4719
ENSG00000173698	ADGRG2	-1.2426	0.317563	-0.493591	-0.245011	1.34459	0.26087
ENSG00000174500	GCSAM	-1.24834	0.893062	-0.311477	-0.0973365	0.732457	-0.0616465
ENSG00000175287	PHYHD1	-1.46361	0.346464	-0.548983	0.037809	0.942847	0.730974
ENSG00000175697	GPR156	-1.39076	0.221567	-0.430148	1.17236	-0.391759	0.948273
ENSG00000176046	NUPR1	-1.67554	0.558677	-0.433122	0.261576	0.357961	1.09622
ENSG00000176601	MAP3K19	-0.399657	-0.813863	0.318927	0.833546	0.805305	-0.886035
ENSG00000177406	NINJ2-AS1	-1.54074	0.554644	-0.621397	-0.19456	1.13371	0.683989
ENSG00000177465	ACOT4	-1.28695	0.105903	-0.040417	0.333824	0.620837	0.342266
ENSG00000177700	POLR2L	-1.21203	1.28893	-0.888223	-0.280001	0.530963	0.451066
ENSG00000179284	DAND5	-1.06788	0.539905	0.0914757	-0.0835212	1.16333	-0.827258
ENSG00000180772	AGTR2	-0.791039	0.341396	0.210944	-0.899287	1.54044	-0.466297
ENSG00000180828	BHLHE22	-0.610112	1.34884	0.574934	-0.065958	-0.555696	-0.731035
ENSG00000181019	NQO1	-1.28409	0.0358254	-0.438776	-0.522028	0.985711	1.48488
ENSG00000182397	DNM1P46	-1.15266	0.411003	-1.00536	0.682946	0.309025	0.671615
ENSG00000182508	LHFPL1	-0.995373	1.477	-0.642176	-0.124154	-0.0299682	0.205496
ENSG00000182511	FES	-1.36363	0.971752	-1.09266	0.662991	-0.0512278	0.799477
ENSG00000183779	ZNF703	-1.79405	0.954505	0.167337	0.0360963	0.601656	0.101717
ENSG00000184164	CRELD2	-1.20999	1.07828	-1.15143	-0.0626656	0.472442	0.780676
ENSG00000184232	OAF	-1.46937	0.44355	-0.739689	0.96609	0.224705	0.519719
ENSG00000184898	RBM43	-1.35723	0.69167	-0.329587	0.295932	0.212955	0.538481
ENSG00000184979	USP18	-0.46212	0.20522	1.63877	-0.486836	-0.214957	-0.360509
ENSG00000185483	ROR1	-1.41754	-0.346231	-0.319462	0.296214	0.549661	1.54333
ENSG00000186009	ATP4B	-1.30916	0.620841	0.200199	-0.269931	0.249686	0.744559
ENSG00000186889	TMEM17	-1.12942	1.11355	-0.802602	0.240536	0.307691	0.0927958
ENSG00000187676	B3GLCT	-1.51004	0.804742	-0.605694	0.210632	0.0292801	1.2262
ENSG00000188501	LCTL	-1.51407	0.698921	-0.709862	0.291153	0.654321	0.536097
ENSG00000188937	NYX	-0.739682	0.0725178	0.415769	0.971739	-0.159539	-0.60915
ENSG00000189171	S100A13	-1.29429	1.06825	-0.812871	-0.0054336	0.983488	-0.189815
ENSG00000196155	PLEKHG4	-1.39591	-0.115233	-1.01122	0.652482	0.738169	1.17188
ENSG00000196159	FAT4	-1.55913	-0.115865	0.0380789	-0.178843	1.21307	0.816269
ENSG00000196739	COL27A1	-1.6472	0.101557	-0.60976	1.0935	0.386375	0.697449
ENSG00000198624	CCDC69	-1.54143	0.991104	-0.478389	0.204649	-0.0983889	1.07047
ENSG00000198682	PAPSS2	-1.1213	0.362901	-1.16349	0.0931921	0.402362	1.51395
ENSG00000203392		-0.880589	-0.579224	-0.969058	0.627947	0.355691	1.60396
ENSG00000203506		-0.72479	0.992042	-0.0897969	-0.372016	-0.58368	1.00772
ENSG00000204959		-1.52167	-0.534998	-0.309889	0.828808	0.534998	1.23371
ENSG00000205413	SAMD9	-1.01753	-0.302197	-0.0918068	-0.505575	0.847938	1.39495
ENSG00000206190	ATP10A	-1.08457	0.435144	-0.673596	-0.535585	1.60622	0.111984
ENSG00000207561	MIR635	-1.19188	0.461106	-0.837126	0.415818	0.0761648	1.15551
ENSG00000207726	MIR455	-1.0451	0.38853	-0.639354	0.361481	0.902472	-0.170494
ENSG00000213996	TM6SF2	-1.20263	0.430569	-0.752259	1.09869	-0.296945	0.712667
ENSG00000214269		-0.932851	0.951889	-0.945169	0.0526338	0.372916	0.352385
ENSG00000215034	DSTNP4	-1.15131	0.589296	-0.671143	0.0641132	0.319202	0.909407
ENSG00000215326		-1.36467	0.274502	0.418289	-0.0993435	0.792134	0.111544
ENSG00000216740		-0.896191	1.22058	-0.170441	-0.684514	0.0714753	0.555308
ENSG00000224677		-1.10961	1.22765	-0.471589	-0.205482	0.496655	-0.074032
ENSG00000225913		-0.671515	0.728516	-1.31856	-0.207701	0.462252	0.903162
ENSG00000226887	ERVMER34-1	-1.3654	0.861198	-0.461269	0.65878	0.213459	-0.0294427
ENSG00000229233		-1.28344	1.17757	-1.0454	0.188771	0.287651	0.551331
ENSG00000230077	MTAPP2	-0.82039	1.07742	-1.03986	0.0316889	0.690113	-0.265248
ENSG00000232021	LEF1-AS1	-0.958515	1.16391	-0.547723	0.342327	-0.114109	-0.030429
ENSG00000233868		-1.38508	0.389973	0.636507	-0.103096	0.242052	0.505022
ENSG00000236739		-1.22536	0.49905	-0.51451	-0.276426	0.713327	0.900393
ENSG00000237125	HAND2-AS1	-0.9552	0.554455	0.437709	-0.665346	0.409528	0.437709
ENSG00000237415		-1.58639	0.631866	0.299128	0.114274	0.114274	0.668837
ENSG00000239392		-1.03898	1.18216	-0.702443	-0.150524	0.414857	0.15909
ENSG00000242539		-1.33935	0.0241161	-0.326735	0.289394	0.337885	1.24401
ENSG00000244479		-1.4064	-0.165185	-0.216369	-0.114001	0.922476	1.23385
ENSG00000246095		-1.26557	-0.738003	-0.275038	0.494775	0.693957	1.36149
ENSG00000249215		-1.36393	0.89462	-0.643344	-0.234654	0.797825	0.518195
ENSG00000250602		-0.702588	0.358833	-1.02323	0.856374	-0.437233	0.922713
ENSG00000253833	DSTNP3	-1.49657	0.480322	-0.364808	0.0991269	0.356212	1.11269
ENSG00000256043	CTSO	-1.65939	0.306847	-0.408496	0.362249	0.552496	0.992225
ENSG00000257038	LOC100287837	-0.952535	-0.0860945	-1.03985	-0.287592	1.11282	1.32439
ENSG00000258203		-1.12654	0.133846	-1.07077	0.635767	0.0334614	1.50205
ENSG00000258711		-1.06307	-0.813322	-0.622093	0.549183	0.648094	1.52758
ENSG00000258734		-1.08574	0.116206	-1.11118	0.803033	0.516855	0.644045
ENSG00000258920	FOXN3-AS1	-1.36728	0.281777	-0.492389	0.307678	0.152269	1.32647
ENSG00000259676		-1.27917	-0.139868	-0.44498	-0.344358	1.52527	0.762486
ENSG00000260027	HOXB7	-0.940519	-0.440165	-0.423318	-0.480598	1.22768	1.26812
ENSG00000260807	CEROX1	-1.15464	-0.346652	-0.7293	1.22546	-0.0597758	1.17677
ENSG00000264395	MIR3193	-1.2438	0.379238	-0.537355	0.178034	0.338997	1.00073
ENSG00000264514		-0.748546	-0.702546	1.22946	0.0794546	1.06846	-0.825213
ENSG00000270959	LPP-AS2	-1.06849	1.21403	-0.732984	-0.450309	0.286757	0.757
ENSG00000270964		-1.37105	0.356504	-0.420894	0.356504	0.287402	0.915079
ENSG00000271361		-1.29468	0.753379	-0.770231	0.00739816	0.848322	0.351002
ENSG00000272142	LYRM4-AS1	-1.35376	0.336534	-0.75773	-0.0406381	0.615921	1.34698
ENSG00000272902	TBC1D8-AS1	-1.39407	-0.180008	-0.38717	0.051243	0.889527	1.23158
ENSG00000274767		-1.38123	0.897799	-0.633611	0.825449	-0.151277	0.37929
ENSG00000274922		-1.26953	0.366544	-0.817724	0.400772	-0.0578754	1.5645
ENSG00000275155		-0.873099	-0.0602137	1.20427	-0.0301069	0.903206	-1.12399
ENSG00000275719		-1.40215	0.0745823	-0.264518	0.173031	0.763722	0.7856
ENSG00000276600	RAB7B	-1.59563	0.588403	0.06397	0.409167	0.0440548	0.674702
ENSG00000277954		-0.562411	-0.354751	1.55168	0.320141	0.268227	-1.11328

## Sheet: Cluster 4
Ensembl Gene ID	symbol	WT_TGFβ3	WT_BMP4	V620I_TGFβ3	V620I_BMP4	T89I_TGFβ3	T89I_BMP4
ENSG00000002079		-0.0376013	-1.00442	0.875797	-0.363322	1.48243	-0.978574
ENSG00000002587	HS3ST1	0.131209	-0.616857	1.16737	-0.919042	1.31036	-1.04161
ENSG00000002745	WNT16	-0.760862	-0.148018	-0.808908	0.0612456	1.75564	-0.401768
ENSG00000005102	MEOX1	-0.405828	-0.646537	0.262387	-0.60473	1.92568	-0.620496
ENSG00000006016	CRLF1	-0.714388	-0.887499	-0.0245263	-0.183026	1.94432	-0.188011
ENSG00000006327	TNFRSF12A	-0.0813187	-0.920551	0.421154	-0.78609	1.80541	-0.444421
ENSG00000007171	NOS2	-0.379875	-0.506013	-0.251137	-0.479409	2.00162	-0.597291
ENSG00000010327	STAB1	0.871621	-1.1168	0.138979	-0.465419	1.12303	-0.688893
ENSG00000011426	ANLN	-0.436521	-1.04757	1.2443	-0.7775	1.06265	0.354283
ENSG00000013364	MVP	0.306033	-0.982676	0.490237	-0.780592	1.6462	-0.742194
ENSG00000013588	GPRC5A	0.141687	-1.41687	0.908238	-0.55184	1.09935	0.0619857
ENSG00000013619	MAMLD1	0.563282	-0.505127	-0.291892	-0.957274	1.63839	-0.693801
ENSG00000014914	MTMR11	-0.303812	-1.16873	0.965611	-0.42815	1.57075	-0.525688
ENSG00000017483	SLC38A5	0.246779	-1.19345	0.433201	-0.665582	1.59873	-0.415177
ENSG00000018408	WWTR1	-0.180848	-0.840022	0.782411	-0.811368	1.68618	-0.587669
ENSG00000024526	DEPDC1	-0.507441	-0.958542	1.25022	-0.655776	0.99013	0.258616
ENSG00000025708	TYMP	-0.113878	-0.616259	-0.512126	-0.632006	1.93832	-0.256109
ENSG00000038295	TLL1	-0.579139	-0.120592	0.416199	-0.57368	1.60442	-0.857542
ENSG00000046604	DSG2	-0.192478	-1.04534	0.938075	-0.535156	1.54697	-0.636742
ENSG00000049192	ADAMTS6	0.179744	-0.835447	0.642663	-0.853873	1.66499	-0.849877
ENSG00000049323	LTBP1	-0.342382	-0.926057	1.13421	-0.675925	1.53771	-0.592002
ENSG00000049540	ELN	0.154556	-0.997754	1.02177	-0.810141	1.4515	-0.752654
ENSG00000053108	FSTL4	0.0268385	0.225444	0.483094	-0.901775	1.197	-1.2131
ENSG00000054392	HHAT	-0.465343	-0.712731	0.0724858	-0.610865	1.95852	-0.298598
ENSG00000064886	CHI3L2	-0.655154	-0.863107	1.00127	-0.513459	1.66211	-0.50846
ENSG00000065325	GLP2R	-0.428525	-0.767551	-0.187294	-0.558919	2.00986	-0.152522
ENSG00000066279	ASPM	-0.438795	-1.06477	1.11663	-0.63647	1.105	0.263402
ENSG00000070404	FSTL3	-0.240723	-1.00223	0.323938	-0.590661	1.8484	-0.343657
ENSG00000071282	LMCD1	0.258009	-0.737137	0.539983	-0.850586	1.57373	-0.865336
ENSG00000072201	LNX1	-0.676339	-0.109057	-0.20801	-0.704805	1.94048	-0.39236
ENSG00000075213	SEMA3A	-0.152368	-0.750608	-0.119148	-0.719103	1.94997	-0.318041
ENSG00000075702	WDR62	0.415777	-1.13553	0.576983	-1.03938	1.19932	0.169424
ENSG00000077274	CAPN6	-0.82415	-0.60233	1.14474	-0.817063	1.43615	-0.0682137
ENSG00000077782	FGFR1	0.171263	-0.617367	0.565786	-0.976087	1.64488	-0.8627
ENSG00000078098	FAP	0.0126514	-0.873057	0.910073	-0.823726	1.59176	-0.786916
ENSG00000080986	NDC80	-0.695497	-0.921807	1.20844	-0.747569	1.17106	0.383313
ENSG00000081277	PKP1	-0.95	-0.88983	-0.689698	0.380285	1.4712	0.67416
ENSG00000082497	SERTAD4	0.0243539	-0.777429	0.352761	-0.786906	1.83073	-0.740432
ENSG00000082781	ITGB5	-0.554441	-0.766962	0.431405	-0.697766	1.80175	-0.141518
ENSG00000085117	CD82	0.430408	-1.1862	1.18333	-0.449346	1.08463	-1.02265
ENSG00000086991	NOX4	0.244589	-0.841629	0.671914	-0.863114	1.46211	-0.674518
ENSG00000087494	PTHLH	-0.239893	-0.496712	0.395735	-0.830577	1.71193	-0.588739
ENSG00000088325	TPX2	-0.601848	-1.08761	1.22392	-0.644029	1.11587	0.399565
ENSG00000088992	TESC	0.341919	-0.859832	0.444458	-0.732685	1.6093	-0.922723
ENSG00000089685	BIRC5	-0.318994	-1.00543	0.898289	-0.84047	1.30549	0.247585
ENSG00000089692	LAG3	0.337026	-1.32295	-0.0871908	-0.293766	1.35515	-0.013414
ENSG00000090006	LTBP4	0.302483	-1.15468	0.868621	-0.484267	1.37342	-0.917903
ENSG00000092200	RPGRIP1	-0.0123144	0.0328383	-0.328383	-0.0800434	0.981044	-0.900317
ENSG00000095596	CYP26A1	-0.278147	-0.841002	1.34908	-0.67864	1.30217	-0.688261
ENSG00000095713	CRTAC1	0.134739	-0.750667	0.362521	-0.818112	1.78752	-0.83383
ENSG00000095752	IL11	0.252827	-1.13518	1.17095	-0.648531	1.24203	-0.785814
ENSG00000099377	HSD3B7	-0.0757656	-1.02356	0.233125	-0.555129	1.8344	-0.473049
ENSG00000100036	SLC35E4	0.0686759	-1.00921	0.309274	-0.812184	1.70929	-0.251375
ENSG00000100055	CYTH4	-0.613635	-0.968563	0.552559	-0.255537	1.75044	-0.43617
ENSG00000100336	APOL4	0.216294	-0.213503	1.05235	-0.778378	0.907038	-1.22762
ENSG00000100593	ISM2	-0.558166	-1.14924	0.822616	-0.322703	1.64095	-0.30374
ENSG00000101074	R3HDML	-0.0223863	-0.749652	0.12009	-0.69734	1.87233	-0.657362
ENSG00000101096	NFATC2	-0.571366	-1.07435	0.171315	-0.282017	1.84108	-0.0557817
ENSG00000101447	FAM83D	-0.256257	-1.00666	1.30195	-0.690329	1.1145	-0.183619
ENSG00000101463	SYNDIG1	0.123599	-0.489338	-0.13919	-0.787784	1.79126	-0.711122
ENSG00000102359	SRPX2	0.224093	-0.856936	0.76368	-0.907906	1.57781	-0.813096
ENSG00000102362	SYTL4	-0.0874359	-0.687082	0.865903	-0.943823	1.5956	-0.702244
ENSG00000102452	NALCN	0.276798	-1.57132	0.329671	-0.327113	1.37451	-0.0001764
ENSG00000102802	MEDAG	0.0332903	-1.23288	1.16874	-0.603148	1.31119	-0.513346
ENSG00000103196	CRISPLD2	-0.358506	-0.638688	0.37861	-0.631162	1.84927	-0.673164
ENSG00000103335	PIEZO1	-0.284817	-0.556394	-0.132288	-0.691949	1.92759	-0.393618
ENSG00000104783	KCNN4	0.716347	-0.81802	-0.181457	-0.780204	1.65039	-0.84323
ENSG00000105650	PDE4C	-0.127749	-0.638368	-0.585961	-0.32671	1.87159	-0.452394
ENSG00000105664	COMP	-0.153097	-0.966095	0.216827	-0.422171	1.87997	-0.668298
ENSG00000105929	ATP6V0A4	-0.200615	-0.781376	0.633364	-0.749431	1.80106	-0.726218
ENSG00000106006	HOXA6	-1.18755	-1.09588	0.355571	0.347932	1.2188	0.600026
ENSG00000106078	COBL	0.589361	-0.726592	0.840608	-1.01285	1.14128	-0.828875
ENSG00000106436	MYL10	-0.0295312	-0.822531	1.03417	-0.77476	1.48959	-0.851194
ENSG00000106624	AEBP1	-0.10793	-1.11003	1.03665	-0.603209	1.52852	-0.646457
ENSG00000106799	TGFBR1	0.286289	-0.866203	0.688301	-0.826976	1.45041	-0.746335
ENSG00000106809	OGN	-0.520142	-0.58719	-0.144191	-0.640113	1.96332	-0.143645
ENSG00000107159	CA9	0.143511	-1.11712	0.736795	-0.519386	1.55522	-0.819762
ENSG00000108405	P2RX1	-0.547103	-0.35742	-0.288444	-0.538481	1.91303	-0.33826
ENSG00000108821	COL1A1	-0.406137	0.57145	0.69058	-0.729363	0.829292	-1.04424
ENSG00000109805	NCAPG	-0.333936	-1.04799	0.746446	-0.774675	1.24872	0.464068
ENSG00000110328	GALNT18	-0.23217	-0.686758	0.00956344	-0.668877	1.97735	-0.528961
ENSG00000111247	RAD51AP1	-0.575551	-0.917033	1.07039	-0.619944	0.985019	0.432957
ENSG00000111863	ADTRP	-0.320729	-1.10535	1.0148	-0.571141	1.44328	-0.276212
ENSG00000112759	SLC29A1	0.0178425	-0.694532	0.213145	-0.749861	1.84882	-0.776171
ENSG00000112984	KIF20A	-0.438737	-0.906313	1.21286	-0.756612	1.20988	-0.0238209
ENSG00000114541	FRMD4B	-0.469087	-0.38829	-0.0696674	-0.866057	1.97951	-0.27177
ENSG00000114861	FOXP1	-0.110818	-0.817078	0.731422	-0.95338	1.63699	-0.405709
ENSG00000114993	RTKN	-0.26743	-0.888943	0.203597	-0.639392	1.86756	-0.299319
ENSG00000115414	FN1	0.335864	-1.46965	0.821183	-0.495243	1.24605	-0.310534
ENSG00000115526	CHST10	-0.131573	-0.55712	0.0343725	-0.804548	1.9384	-0.62792
ENSG00000115641	FHL2	0	-0.616099	0.80411	-0.963197	1.51313	-0.715889
ENSG00000116194	ANGPTL1	-0.670103	-0.244022	0.00934303	-0.794288	1.85712	-0.207623
ENSG00000116690	PRG4	-0.165507	-0.629223	-0.135096	-0.627479	1.97932	-0.607722
ENSG00000116991	SIPA1L2	0.597439	-0.506699	0.777185	-0.590192	1.07022	-1.53821
ENSG00000117069	ST6GALNAC5	-0.16781	-0.754857	0.542451	-0.791187	1.81823	-0.68162
ENSG00000117122	MFAP2	-0.40462	-0.901649	0.484098	-0.606057	1.85257	-0.404419
ENSG00000117724	CENPF	-0.350702	-1.06261	1.4437	-0.572096	0.829687	0.0972619
ENSG00000118292	C1orf54	-0.0338713	0.130759	0.685303	-0.640403	1.10554	-1.43467
ENSG00000118515	SGK1	-0.195371	-0.348285	-0.520205	-0.692988	1.95682	-0.440033
ENSG00000119608	PROX2	0.370665	-1.20687	0.516284	-0.648664	1.15943	-0.0823701
ENSG00000119681	LTBP2	0.00743093	-0.923463	0.78503	-0.798647	1.6332	-0.676393
ENSG00000119699	TGFB3	-0.546978	-0.966765	0.966738	-0.622273	1.66751	-0.342058
ENSG00000119714	GPR68	0.0647805	-0.892736	1.08652	-0.79411	1.39263	-0.780612
ENSG00000120549	KIAA1217	-0.295627	-0.786742	0.0446996	-0.666575	1.90394	-0.251363
ENSG00000120708	TGFBI	-0.0079334	-1.0358	0.922201	-0.71511	1.58043	-0.684305
ENSG00000121440	PDZRN3	-0.0095337	0.174852	0.411516	-0.995009	1.47588	-1.2731
ENSG00000121858	TNFSF10	0.217468	-0.600101	-0.135803	-0.690943	1.58008	-0.539541
ENSG00000122176	FMOD	-0.164247	-0.800595	0.296353	-0.706078	1.88203	-0.577832
ENSG00000122641	INHBA	-0.567663	-0.461692	-0.624315	-0.238753	1.79469	-0.077797
ENSG00000122778	KIAA1549	0.114494	-0.819932	0.598216	-0.65392	1.55206	-0.855146
ENSG00000122861	PLAU	0.202316	-1.05152	1.12751	-0.755032	1.15252	-0.525221
ENSG00000122877	EGR2	0.298419	-0.600433	0.479388	-0.920424	1.63591	-1.03068
ENSG00000123146	ADGRE5	-0.384679	-0.272358	-0.327799	-0.725961	1.92654	-0.396919
ENSG00000123338	NCKAP1L	0.797794	-1.21931	0.334994	-0.276251	0.850186	-0.538213
ENSG00000123485	HJURP	-0.0475924	-1.12573	1.28591	-0.914246	1.01188	0.148338
ENSG00000123610	TNFAIP6	-0.511271	-0.35253	-0.198828	-0.69269	1.953	-0.329852
ENSG00000123977	DAW1	-0.580539	-0.814321	-0.178599	-0.291388	1.91108	-0.121179
ENSG00000124225	PMEPA1	0.0514561	-0.814494	0.242946	-0.759002	1.86555	-0.700956
ENSG00000124839	RAB17	0.507431	-0.741768	0.0414597	-0.424511	1.4592	-1.1086
ENSG00000125384	PTGER2	-0.618813	-0.996679	0.472715	-0.366392	1.77153	-0.192248
ENSG00000125740	FOSB	-0.045912	-1.03353	0.277558	-0.554685	1.78567	-0.479616
ENSG00000125813	PAX1	-0.277405	-0.931114	-0.144874	-0.531083	1.85934	-0.0147831
ENSG00000125965	GDF5	-0.443962	-0.792303	0.284017	-0.633554	1.93365	-0.369123
ENSG00000126778	SIX1	0.0562839	-0.901155	1.42583	-0.968289	1.14871	-0.5399
ENSG00000126787	DLGAP5	-0.348227	-1.05863	1.35011	-0.635231	0.967441	0.0827513
ENSG00000128606	LRRC17	-0.653904	-0.320812	0.752741	-0.806883	1.76722	-0.733569
ENSG00000129038	LOXL1	-0.0943748	-0.626459	-0.0683287	-0.787104	1.89629	-0.449475
ENSG00000129465	RIPK3	-0.67101	-1.01539	0.447572	-0.376378	1.79319	-0.088123
ENSG00000130592	LSP1	0.303638	0.563678	-0.47771	-1.16639	1.44828	-1.05455
ENSG00000130600	H19	-0.731949	-0.958636	-0.170179	-0.221903	1.7724	0.356958
ENSG00000130635	COL5A1	-0.355871	-1.05902	0.775582	-0.363857	1.61731	-0.560337
ENSG00000130812	ANGPTL6	-0.408186	-0.867054	0.488628	-0.576438	1.86506	-0.506465
ENSG00000131095	GFAP	0.245421	0.22424	0.0680323	-1.07234	1.30347	-1.00243
ENSG00000131242	RAB11FIP4	-0.303285	-0.485209	0.202554	-0.809199	1.94865	-0.670503
ENSG00000131747	TOP2A	-0.468321	-0.9966	1.52851	-0.674594	0.939812	0.071092
ENSG00000132000	PODNL1	0.0877058	-0.97748	0.820015	-0.685931	1.59346	-0.843682
ENSG00000132561	MATN2	-0.749193	-0.278682	1.44385	-0.678279	1.33364	-0.947162
ENSG00000132854	KANK4	0.282041	-0.805689	1.40118	-0.788137	1.07786	-1.08928
ENSG00000133048	CHI3L1	0.0212366	-0.939857	1.12445	-0.849567	1.35556	-0.57429
ENSG00000133110	POSTN	0.027354	-1.07284	0.956662	-0.781076	1.46429	-0.473622
ENSG00000133116	KL	-0.662033	-0.808024	-0.102879	-0.398677	1.8513	0.126126
ENSG00000133800	LYVE1	-0.475948	-1.38583	1.24272	-0.349576	0.845547	0.578359
ENSG00000133816	MICAL2	0.309183	-0.807867	-0.151542	-0.768342	1.71203	-0.4418
ENSG00000134013	LOXL2	0.536055	-1.03539	0.768657	-0.657859	1.34484	-1.01885
ENSG00000134198	TSPAN2	-0.720384	-0.977839	0.13314	-0.114593	1.83729	-0.165778
ENSG00000134259	NGF	-0.0168056	-0.973119	0.540646	-0.664539	1.78548	-0.715332
ENSG00000134627	PIWIL4	0.129235	-0.628498	0.308051	-0.413919	1.38989	-0.943662
ENSG00000134690	CDCA8	-0.157446	-0.882146	1.51129	-0.941806	0.793612	0.0724221
ENSG00000134955	SLC37A2	-0.525483	-1.1515	0.107164	-0.303084	1.7191	0.240787
ENSG00000135318	NT5E	-0.315008	-0.763465	0.395038	-0.751926	1.85031	-0.421586
ENSG00000135451	TROAP	-0.291337	-1.022	0.834692	-0.749547	1.41491	0.0292714
ENSG00000136286	MYO1G	-0.527124	-0.963002	-0.0019388	-0.267197	1.83621	-0.103244
ENSG00000136634	IL10	0.195092	-1.0312	0.437796	-0.801271	1.59383	-0.379733
ENSG00000136859	ANGPTL2	-0.558844	-0.633279	0.185302	-0.471218	1.88631	-0.482599
ENSG00000137727	ARHGAP20	-0.055163	-0.739026	0.114536	-0.568603	1.83794	-0.748072
ENSG00000137731	FXYD2	-0.0434668	-1.05429	0.3983	-0.110855	1.45512	-0.726975
ENSG00000137767	SQOR	-0.520496	-1.00892	0.592034	-0.504991	1.68518	-0.126394
ENSG00000137801	THBS1	-0.678382	-0.600877	0.777734	-0.588905	1.63462	-0.466345
ENSG00000137807	KIF23	-0.441049	-1.02521	1.29432	-0.771395	0.802835	0.618772
ENSG00000137812	KNL1	-0.537222	-0.975819	1.44463	-0.525612	0.677948	0.369641
ENSG00000137877	SPTBN5	0.258589	-0.812343	-0.0086468	-0.726979	1.75574	-0.624701
ENSG00000138152	BTBD16	-0.428604	-0.715756	1.02719	-0.7024	1.61485	-0.717982
ENSG00000138180	CEP55	-0.610734	-0.998667	0.810467	-0.735165	1.30453	0.576244
ENSG00000138311	ZNF365	0.258359	-0.64206	0.336804	-1.00146	1.63585	-0.67105
ENSG00000138316	ADAMTS14	-0.857593	-0.428082	0.671884	-0.0666646	1.44448	-0.794738
ENSG00000138615	CILP	-0.720804	-0.814789	-0.172082	-0.0261744	1.75954	-0.091614
ENSG00000138696	BMPR1B	0.207906	-0.932078	0.979565	-1.15844	1.26446	-0.155364
ENSG00000139211	AMIGO2	0.178476	-0.270405	-0.129821	-0.684756	1.60034	-0.968389
ENSG00000139329	LUM	-0.17725	-0.297985	0.851872	-0.553151	1.40643	-1.35593
ENSG00000139734	DIAPH3	-0.378566	-0.894195	1.13525	-0.852553	0.874376	0.532665
ENSG00000139926	FRMD6	-0.235573	-0.672368	0.588914	-0.839848	1.79549	-0.652513
ENSG00000140092	FBLN5	-0.318076	-0.870295	0.494564	-0.692775	1.8485	-0.451034
ENSG00000140859	KIFC3	0.155347	-0.773625	0.19195	-0.749223	1.83214	-0.811471
ENSG00000142661	MYOM3	-0.180036	-0.567666	-0.39804	-0.663195	2.02449	-0.420085
ENSG00000143147	GPR161	0.511411	-0.661206	0.52196	-0.568318	1.21383	-1.18292
ENSG00000143179	UCK2	0.629546	-0.774817	0.916045	-0.987054	1.18062	-0.980435
ENSG00000143196	DPT	-0.31713	-0.483395	-0.0925589	-0.627173	1.95147	-0.605805
ENSG00000143228	NUF2	-0.301065	-1.21139	1.43065	-0.749951	0.79133	0.530787
ENSG00000143369	ECM1	-0.687905	-1.10345	0.692597	-0.234444	1.70264	-0.261725
ENSG00000143641	GALNT2	-0.373202	-0.709313	0.533013	-0.741448	1.79622	-0.496027
ENSG00000143768	LEFTY2	0.0479255	-0.748888	0.701369	-0.763415	1.51122	-0.763822
ENSG00000143816	WNT9A	0.0312643	-0.93536	0.479981	-0.426869	1.66728	-0.9284
ENSG00000143867	OSR1	-1.0473	-0.118426	0.716048	-0.662156	0.357337	1.24467
ENSG00000143869	GDF7	-0.585832	-1.12464	0.50718	-0.208666	1.63714	-0.13118
ENSG00000143878	RHOB	0.903143	-0.18125	-0.306111	-1.07985	1.37864	-1.05481
ENSG00000144057	ST6GAL2	0.391508	0.566727	0.0582499	-0.758577	0.810658	-1.40534
ENSG00000144152	FBLN7	-0.145479	-1.01688	1.24952	-0.660484	1.42677	-0.721419
ENSG00000144648	ACKR2	-0.203452	-0.737676	0.0516286	-0.0735051	1.45698	-0.641419
ENSG00000144649	GASK1A	-0.333828	-0.589279	0.33369	-0.561909	1.75311	-0.691155
ENSG00000144847	IGSF11	0.552705	-0.299511	-0.273779	-1.01587	1.62415	-0.874859
ENSG00000145386	CCNA2	-0.271851	-1.02761	1.39672	-0.811589	0.960189	0.137761
ENSG00000145431	PDGFC	-0.0925142	-0.63833	0.346338	-0.859422	1.86133	-0.707751
ENSG00000145536	ADAMTS16	0.0844186	-0.899823	0.880996	-0.642834	1.39983	-0.803121
ENSG00000145824	CXCL14	-0.989276	-0.12305	-0.163755	-0.0785403	1.6037	-0.386684
ENSG00000145832	SLC25A48	0.363384	0.339448	0.323491	-0.785518	0.722415	-1.17646
ENSG00000146670	CDCA5	-0.199273	-1.10631	1.29062	-0.840919	1.18144	-0.0038684
ENSG00000146674	IGFBP3	-0.485983	-1.0602	0.537678	-0.56253	1.62887	0.102116
ENSG00000148288	GBGT1	-0.426281	-0.79068	0.0130192	-0.65889	1.97164	-0.140736
ENSG00000148344	PTGES	-0.332857	-0.936589	0.587858	-0.438923	1.77628	-0.678405
ENSG00000148773	MKI67	-0.352457	-1.10132	1.03791	-0.686545	1.09459	0.356397
ENSG00000148848	ADAM12	-0.293786	-0.883476	0.395868	-0.676366	1.79769	-0.321284
ENSG00000149043	SYT8	-0.384099	-0.123361	-0.621786	-0.895371	1.86165	0.010031
ENSG00000149380	P4HA3	-0.0762141	-0.834021	0.688716	-0.918678	1.70159	-0.518953
ENSG00000149506	ZP1	0.39668	-1.0792	0.25612	-0.565853	1.45088	-0.526129
ENSG00000149968	MMP3	-0.303936	-0.68998	0.275516	-0.649361	1.91458	-0.637252
ENSG00000150687	PRSS23	0.186871	-1.04326	0.994597	-0.985021	1.38954	-0.392109
ENSG00000150764	DIXDC1	-0.479429	-0.829994	0.29694	-0.551524	1.8794	-0.321549
ENSG00000151655	ITIH2	0.261789	-1.00527	0.509616	-0.53405	1.32989	-0.579427
ENSG00000152049	KCNE4	0.432541	-0.947823	1.1291	-1.04665	1.15938	-0.592371
ENSG00000152253	SPC25	-0.590514	-0.811669	0.95968	-0.685294	1.14082	0.302533
ENSG00000152689	RASGRP3	-0.28767	-1.06029	1.26279	-0.693014	1.40089	-0.409348
ENSG00000152931	PART1	-0.69383	-0.839381	-0.0824425	-0.630357	1.80133	0.565424
ENSG00000153904	DDAH1	0.383509	-0.544263	1.15886	-0.82777	1.02227	-1.20386
ENSG00000154096	THY1	-0.197089	-0.780102	0.605382	-0.684565	1.80207	-0.792464
ENSG00000154146	NRGN	-0.498071	-0.692826	0.234825	-0.610824	1.90562	-0.373359
ENSG00000154175	ABI3BP	-0.0204733	-0.531568	-0.293729	-0.802999	1.96322	-0.517183
ENSG00000154493	C10orf90	-0.335974	-0.936332	-0.0500889	-0.577676	1.87054	0.0226818
ENSG00000154839	SKA1	-0.517695	-1.08481	1.26195	-0.56803	1.02929	0.259712
ENSG00000155629	PIK3AP1	0.170981	-0.531428	-0.16636	-0.628471	1.70519	-0.78867
ENSG00000155893	PXYLP1	0.0969574	-0.573291	0.806531	-0.929064	1.56832	-1.02376
ENSG00000156049	GNA14	0.0465241	0.0172804	0.334087	-0.450619	0.923835	-1.05011
ENSG00000156427	FGF18	-0.464705	-0.214038	0.438515	-0.699993	1.70056	-0.867617
ENSG00000156466	GDF6	-0.336232	-0.682736	0.361798	-0.667671	1.82189	-0.542126
ENSG00000157551	KCNJ15	0.149506	-0.825049	1.09216	-0.903362	1.16757	-0.543705
ENSG00000158352	SHROOM4	0.0348475	-0.634301	0.837604	-0.79013	1.41398	-0.870128
ENSG00000158710	TAGLN2	0.394193	-1.22836	0.610769	-0.572918	1.49938	-0.733836
ENSG00000158715	SLC45A3	-0.236351	-0.801155	0.582097	-0.631566	1.80903	-0.768712
ENSG00000159216	RUNX1	-0.208479	-0.73118	0.346771	-0.828141	1.84341	-0.447581
ENSG00000159374	M1AP	0.557034	-0.580432	-0.151461	-0.655156	1.40391	-0.815674
ENSG00000159871	LYPD5	-0.0939133	-1.02924	-0.466182	-0.177674	1.83258	-0.242821
ENSG00000160161	CILP2	0.112764	-0.898504	0.454053	-0.722672	1.75772	-0.786468
ENSG00000160224	AIRE	0.853906	-1.17826	0.277349	-0.100128	0.179102	0.0498288
ENSG00000160447	PKN3	-0.394382	-0.948482	-0.0746828	-0.530491	1.92755	0.00242957
ENSG00000162407	PLPP3	0.228719	-0.718762	1.09489	-1.00858	1.26304	-0.780774
ENSG00000162458	FBLIM1	-0.448781	-0.866204	0.15514	-0.425049	1.88801	-0.352444
ENSG00000162461	SLC25A34	0.0209779	-0.360965	-0.63416	-0.241608	1.57262	-0.687208
ENSG00000163347	CLDN1	0.420636	-0.0999872	0.659686	-0.968842	1.14468	-1.32167
ENSG00000163359	COL6A3	-0.688164	-0.746313	0.429612	-0.491636	1.74965	-0.194335
ENSG00000163421	PROK2	0.0935804	0.0200529	0.6818	-0.384348	0.755328	-1.32795
ENSG00000163453	IGFBP7	-0.125072	-1.0903	0.250169	-0.40916	1.81565	-0.504997
ENSG00000163485	ADORA1	0.328092	-0.802768	0.108052	-0.781125	1.79036	-0.820804
ENSG00000164107	HAND2	-0.890102	0.717824	-0.038284	-0.650827	1.08152	-0.306272
ENSG00000164185	ZNF474	-0.2549	-1.12987	0.0665873	0.147788	1.58951	-0.536615
ENSG00000164692	COL1A2	-0.667874	-0.482569	1.0036	-0.577835	1.49637	-0.694392
ENSG00000164764	SBSPON	-0.636615	-0.416516	-0.50567	-0.493829	2.01154	-0.113764
ENSG00000164932	CTHRC1	0.723388	-0.841676	-0.387021	-0.89056	1.56832	-0.358936
ENSG00000165474	GJB2	0.824936	-0.743759	-0.639179	-0.514488	1.12661	-0.285217
ENSG00000165480	SKA3	-0.365228	-0.927755	1.30842	-0.764318	0.938466	0.183363
ENSG00000165495	PKNOX2	-0.118584	-0.627534	0.506872	-0.637011	1.69981	-0.929114
ENSG00000165623	UCMA	-0.188144	-0.72391	0.229673	-0.680393	1.86432	-0.592168
ENSG00000165633	VSTM4	-0.316884	-0.867306	0.282502	-0.5769	1.81136	-0.349527
ENSG00000165801	ARHGEF40	-0.521373	-0.755528	0.0285317	-0.612482	1.96077	-0.123711
ENSG00000166033	HTRA1	-0.442361	-0.553468	0.310473	-0.688001	1.91321	-0.616313
ENSG00000166482	MFAP4	-0.0437318	-1.0061	1.43379	-0.661422	1.23346	-0.796723
ENSG00000166670	MMP10	0.837209	-0.824584	0.0150927	-0.805428	1.43105	-0.866089
ENSG00000166741	NNMT	-0.379997	-0.581851	0.164747	-0.78744	1.94666	-0.427909
ENSG00000166923	GREM1	-0.575336	-0.808014	1.00429	-0.722586	1.67747	-0.432993
ENSG00000167434	CA4	0.221837	-0.655112	0.615829	-0.636048	1.40381	-1.06181
ENSG00000167772	ANGPTL4	0.577273	-1.62336	0.56276	-0.442517	0.832859	0.311564
ENSG00000168056	LTBP3	0.0989651	-0.955982	0.789795	-0.71461	1.60098	-0.828928
ENSG00000168078	PBK	-0.35655	-0.977193	0.912553	-0.930254	1.15594	0.564853
ENSG00000168487	BMP1	-0.257055	-0.744989	0.0933065	-0.697237	1.92123	-0.389241
ENSG00000168542	COL3A1	-0.131012	-0.770599	0.681464	-0.777496	1.71116	-0.724202
ENSG00000168952	STXBP6	0.175905	-0.156108	0.594788	-1.12716	1.48254	-1.09502
ENSG00000169607	CKAP2L	-0.481874	-1.13209	1.00184	-0.665665	1.09657	0.575571
ENSG00000169679	BUB1	-0.260482	-1.11351	1.47838	-0.795265	0.872514	0.250606
ENSG00000169715	MT1E	0.277157	-0.698657	0.0364197	-0.715747	1.53965	-0.572959
ENSG00000169860	P2RY1	-0.0070619	-0.299859	-0.205959	-0.748871	1.86581	-0.874071
ENSG00000169933	FRMPD4	0.124445	0.504986	0.161442	-1.18102	1.22379	-1.0577
ENSG00000170312	CDK1	-0.540849	-1.06653	1.35428	-0.673568	1.04362	0.295499
ENSG00000170689	HOXB9	-0.266526	-1.07277	0.222105	-0.468086	1.08942	0.735167
ENSG00000171241	SHCBP1	-0.54849	-1.07956	0.771248	-0.715075	1.06851	0.928231
ENSG00000171509	RXFP1	-0.524037	-0.513181	0.326331	-0.610883	1.81538	-0.549367
ENSG00000171621	SPSB1	0.0741099	-0.849399	0.538069	-0.850221	1.75909	-0.716174
ENSG00000171631	P2RY6	0.0242185	-1.08631	0.367033	-0.510138	1.73726	-0.587065
ENSG00000171812	COL8A2	-0.192293	-0.96358	0.809173	-0.597835	1.67559	-0.705019
ENSG00000171819	ANGPTL7	-0.434295	-0.505043	-0.250174	-0.646541	1.94511	-0.228796
ENSG00000171840	NINJ2	0.00788837	-0.0047076	0.339115	-1.13274	1.65236	-1.03618
ENSG00000171848	RRM2	-0.330288	-1.02966	0.926997	-0.812734	1.16624	0.414916
ENSG00000171872	KLF17	-0.476127	-0.7089	0.631038	-0.574608	1.74417	-0.610419
ENSG00000172296	SPTLC3	0.320931	-0.343118	-0.202188	-1.05243	1.74143	-0.686886
ENSG00000172935	MRGPRF	-0.784712	-0.725518	-0.290473	-0.331209	1.94681	0.149981
ENSG00000172985	SH3RF3	0.0235514	-0.439388	0.625035	-0.888811	1.59428	-1.01121
ENSG00000173917	HOXB2	-1.20954	-1.24734	0.955929	0.371009	1.11161	0.343085
ENSG00000174171	LOC105370792	-0.118567	-0.765061	0.136283	-0.66106	1.86308	-0.560806
ENSG00000174600	CMKLR1	-0.626259	-0.714217	0.180568	-0.410189	1.94419	-0.438598
ENSG00000174946	GPR171	-0.256874	-0.629755	-0.0524796	-0.671187	2.00113	-0.538606
ENSG00000175505	CLCF1	-0.669481	-0.754992	0.150294	0.00435333	1.7488	-0.588529
ENSG00000175879	HOXD8	-1.20203	-1.01965	-0.05234	0.621741	1.20106	0.584192
ENSG00000177042	TMEM80	-0.124314	-0.852547	-0.166141	-0.325945	1.78904	-0.482174
ENSG00000177283	FZD8	-0.396451	-0.701411	-0.0357477	-0.636939	1.9868	-0.300256
ENSG00000178752	ERFE	-0.641387	-1.01352	-0.27815	-0.324987	1.70425	0.645685
ENSG00000178860	MSC	0.56194	-0.205677	-0.784757	-0.993495	1.65276	-0.569285
ENSG00000179300	RTL3	0.0636187	-0.943025	-0.194771	-0.512375	1.75392	-0.288079
ENSG00000179403	VWA1	-0.112702	-0.776413	0.0601544	-0.7946	1.8679	-0.305734
ENSG00000179542	SLITRK4	-0.267203	-0.476013	0.453208	-0.874553	1.79863	-0.694362
ENSG00000179772	FOXS1	0.672374	-0.634879	0.600138	-0.617402	1.19667	-1.42249
ENSG00000179862	CITED4	-0.0546099	-0.9487	1.07973	-0.648097	1.39262	-0.734683
ENSG00000179954	SSC5D	-0.058576	-0.919832	0.449382	-0.6367	1.77956	-0.668653
ENSG00000180340	FZD2	-0.100499	-0.928798	1.17381	-0.736591	1.43836	-0.737109
ENSG00000180347	ITPRID1	-0.062669	-0.810022	0.446508	-0.719202	1.80079	-0.725037
ENSG00000180447	GAS1	-0.355158	-0.686097	-0.102633	-0.661863	1.92761	-0.196687
ENSG00000180638	SLC47A2	0.285457	-1.171	-0.121917	-0.615815	1.70586	-0.150758
ENSG00000181031	RPH3AL	-0.333093	-0.537593	0.027981	-0.478654	1.89676	-0.757869
ENSG00000181126	HLA-V	-0.467037	-1.53447	0.708596	0.837603	0.350704	0.375673
ENSG00000181195	PENK	-0.328685	-1.00186	1.16442	-0.668427	1.47271	-0.462741
ENSG00000181652	ATG9B	1.0758	-0.97248	-0.323252	-0.608627	1.16141	-0.551552
ENSG00000181938	GINS3	-0.396391	-0.865908	-0.0048321	-0.642666	1.89981	0.0117044
ENSG00000182492	BGN	0.0473693	-0.915967	0.48939	-0.696418	1.76453	-0.755405
ENSG00000182752	PAPPA	-0.948838	-1.08237	1.07034	-0.04177	1.41048	-0.187011
ENSG00000182871	COL18A1	0.223322	-0.962064	1.42264	-0.745196	1.13974	-0.963713
ENSG00000183688	RFLNB	0.462384	-0.778282	-0.175298	-0.785052	1.70918	-0.635681
ENSG00000183856	IQGAP3	-0.260603	-1.07318	0.8538	-0.696114	1.40441	-0.0198186
ENSG00000184292	TACSTD2	-0.109385	-0.809446	-0.255231	-0.459415	1.77203	-0.269815
ENSG00000184357	H1-5	-0.328241	-0.928857	0.709059	-0.853989	1.47708	0.136276
ENSG00000184497	TMEM255B	0.145421	-0.943689	1.17456	-0.681135	1.05949	-0.614687
ENSG00000184557	SOCS3	0.28494	-1.25672	1.44512	-0.536457	0.94894	-0.699394
ENSG00000184574	LPAR5	-0.532347	-0.506682	-0.234352	-0.399746	1.96568	-0.468185
ENSG00000184661	CDCA2	-0.489564	-0.993004	1.23231	-0.800197	1.07431	0.378959
ENSG00000185186	LINC00313	-0.507104	-0.747542	0.999637	-0.747542	1.41639	-0.218579
ENSG00000185361	TNFAIP8L1	0.460326	0.0664915	1.293	-0.653663	0.452824	-1.72764
ENSG00000185559	DLK1	-0.197555	-1.07496	1.31005	-0.567979	1.37422	-0.688351
ENSG00000185633	NDUFA4L2	0.0237178	-0.984823	-0.131026	-0.434644	1.79195	-0.397243
ENSG00000185634	SHC4	0.382542	-0.911935	0.359237	-0.929936	1.64545	-0.607403
ENSG00000185697	MYBL1	-0.035281	-1.07145	0.924272	-0.88117	1.24015	0.0727315
ENSG00000186185	KIF18B	-0.309217	-0.98074	1.04979	-0.753707	1.21163	0.059597
ENSG00000186340	THBS2	0.94052	-0.589546	0.816032	-0.902298	0.90986	-1.29408
ENSG00000186743		0.530164	-0.520797	0.0699391	-0.695957	1.35445	-0.960414
ENSG00000186891	TNFRSF18	0.0201137	-0.861376	1.02569	-0.678757	1.47931	-0.971416
ENSG00000187479	C11orf96	0.602959	-1.6696	-0.156317	-0.250349	1.17636	0.343823
ENSG00000187498	COL4A1	0.143471	-1.22953	1.42414	-0.567871	1.04532	-0.612662
ENSG00000187714	SLC18A3	1.01651	-0.139054	-0.0608994	-0.859189	0.581081	-0.738236
ENSG00000187796	CARD9	-0.124286	0.0448246	-0.771526	-0.731456	1.77057	-0.508012
ENSG00000188015	S100A3	-0.486204	-0.702508	-0.207694	-0.47348	2.01615	-0.264244
ENSG00000188257	PLA2G2A	-0.348121	-1.12434	0.920658	-0.502923	1.59441	-0.412696
ENSG00000188282	RUFY4	-0.467839	-0.779142	0.352574	-0.460543	1.83045	-0.51648
ENSG00000188396	TCTEX1D4	0.516484	-1.14381	0.118705	-0.0931559	1.11315	-0.642265
ENSG00000188487	INSC	-0.764769	-0.602068	0.103259	-0.312435	1.89777	-0.394585
ENSG00000188488	SERPINA5	-0.375371	-1.08993	0.651926	-0.35203	1.71433	-0.514594
ENSG00000188624	IGFL3	-0.318758	-0.546132	-0.47167	-0.502253	1.73159	-0.0142637
ENSG00000189057	FAM111B	-0.500202	-0.900312	0.507167	-0.642085	1.37265	0.386094
ENSG00000189320	FAM180A	-0.183369	-0.988052	0.310815	-0.696052	1.85668	-0.29642
ENSG00000196136	SERPINA3	0.10049	-1.40728	0.821035	-0.559088	1.33849	-0.117845
ENSG00000196154	S100A4	-0.38526	-0.58341	0.0434912	-0.638108	2.00183	-0.570223
ENSG00000196196	HRCT1	-0.0545648	-0.855754	0.929495	-0.937231	1.45276	-0.403105
ENSG00000196562	SULF2	-0.373802	-0.87779	0.913402	-0.483195	1.62016	-0.760566
ENSG00000196611	MMP1	-0.273596	-0.752637	0.960199	-0.713354	1.55309	-0.711535
ENSG00000196747	H2AC13	-0.0009113	-0.79668	0.472797	-0.987912	1.58908	-0.210906
ENSG00000196754	S100A2	0.17465	-0.908417	-0.0686099	-0.745957	1.84825	-0.422756
ENSG00000196878	LAMB3	-0.362826	-0.673447	0.0446532	-0.601877	1.97787	-0.497614
ENSG00000196923	PDLIM7	-0.152449	-0.622937	-0.161164	-0.672546	1.92673	-0.477236
ENSG00000197208	SLC22A4	0.266363	-1.1639	0.44208	-0.505977	1.5536	-0.642193
ENSG00000197467	COL13A1	0.0173633	-0.857029	1.49303	-0.656803	1.11257	-0.981165
ENSG00000197506	SLC28A3	-0.340281	-0.302975	-0.0957159	-0.402459	1.68671	-0.758944
ENSG00000197594	ENPP1	-0.867385	0.17943	0.29304	-0.455201	1.59303	-0.892877
ENSG00000197614	MFAP5	0.0343385	-0.898434	0.0815814	-0.66969	1.62631	-0.204952
ENSG00000197859	ADAMTSL2	0.4888	-0.665544	0.347987	-0.935422	1.63832	-1.04952
ENSG00000197892	KIF13B	-0.570427	-0.694369	-0.227244	-0.278986	1.9682	-0.338647
ENSG00000198113	TOR4A	-0.113354	-0.967632	0.604517	-0.762526	1.58491	-0.259717
ENSG00000198542	ITGBL1	-0.295866	-1.27348	0.48829	-0.400307	1.58162	0.0290938
ENSG00000198729	PPP1R14C	-0.0791072	-0.820593	0.371874	-0.238473	1.68926	-1.10665
ENSG00000198732	SMOC1	-0.263247	-0.652785	0.330744	-0.769502	1.91362	-0.634864
ENSG00000198768	APCDD1L	0.0424288	-0.867742	0.773202	-0.892907	1.64728	-0.678616
ENSG00000198842	STYXL2	0.319303	-1.18118	0.384347	-0.652982	0.968615	0.343975
ENSG00000200879	SNORD14E	-0.378259	-0.0710823	0.561888	-1.18809	0.850448	0.487421
ENSG00000202078		-0.0597963	-1.35801	0.37871	0.147917	0.286393	0.932612
ENSG00000203706		-0.0707283	-0.845724	0.58465	-0.821599	1.78534	-0.647703
ENSG00000203811	H3C14	-0.154825	-0.909077	0.825337	-0.913449	1.08696	0.361855
ENSG00000204183		-0.304795	-0.643837	-0.141553	-0.493152	1.84247	-0.392695
ENSG00000204291	COL15A1	-0.114483	-0.94271	1.14863	-0.75729	1.46917	-0.688211
ENSG00000204632	HLA-G	-0.102675	-1.43466	0.863066	-0.0781224	0.86102	0.142852
ENSG00000205644	RPS2P23	0.373919	-0.958768	0.977943	-0.936396	1.3263	-0.71801
ENSG00000205795	CYS1	-0.508732	-1.05402	0.867035	-0.483457	1.60781	-0.282506
ENSG00000207340	RNVU1-1	0.499045	-0.517528	0.28067	-0.381985	0.996035	-1.07476
ENSG00000207808	MIR27A	0.874333	-0.928008	-0.415273	-0.461885	1.02971	-0.270257
ENSG00000207980	MIR23A	-0.185167	-0.812587	-0.294284	-0.467051	1.76984	-0.112423
ENSG00000208024	MIR199A2	-0.363587	-0.653578	1.04206	-0.871071	1.56969	-0.617329
ENSG00000213082		0.123536	0.0228771	0.151497	-0.832726	1.29789	-0.966938
ENSG00000213759	UGT2B11	-0.0387045	-0.669445	-0.0124237	-0.685213	1.91659	-0.685213
ENSG00000213977	TAX1BP3	-0.0328631	-0.401446	0.0025775	-0.833821	1.6612	-0.526669
ENSG00000214688	C10orf105	-0.406872	-0.743171	-0.176388	-0.397444	1.99436	-0.419444
ENSG00000214900	LINC01588	-0.0012774	-1.00597	0.710676	-0.774121	1.51631	-0.357254
ENSG00000215399		-0.158469	-0.869963	0.659749	-1.01226	0.766473	1.03921
ENSG00000215914	MMP23A	-0.351278	-0.913702	0.756211	-0.267956	1.48181	-0.688038
ENSG00000222032		0.235994	-0.313145	0.0862284	-0.762441	1.45908	-0.912206
ENSG00000223653		0.201074	-1.0799	0.921265	-0.635828	1.08921	-0.354014
ENSG00000223855	HRAT92	-0.393093	-0.838697	0.245058	-0.4874	1.83965	-0.405667
ENSG00000224652	LINC00885	-0.420617	-0.72038	-0.242496	-0.550948	1.88626	-0.0165877
ENSG00000224743	TEX26-AS1	0.206503	-1.00619	1.21104	-0.53559	1.06624	-0.852337
ENSG00000224888		-0.207371	-0.704722	-0.409303	-0.457917	1.8456	-0.224822
ENSG00000224963		-0.641786	-0.888386	-0.150393	-0.0750322	1.8486	-0.174137
ENSG00000225285		-0.263074	-0.82765	0.415931	-0.600684	1.7711	-0.522192
ENSG00000225542	ZNF385D-AS1	0.218147	-1.14304	-0.0952534	-0.581726	1.36884	0.278957
ENSG00000225556	C2CD4D	-0.538339	-0.854954	0.227102	-0.378293	1.85193	-0.334222
ENSG00000225643		0.139512	-0.323774	0.515932	-0.700194	1.26877	-1.02836
ENSG00000226476	LINC01748	0.709607	-0.426781	0.380489	-1.09744	0.970418	-0.588234
ENSG00000226744		0.00984475	-0.820396	0.0700071	0.226429	1.30935	-1.03698
ENSG00000226812		0.0325814	-0.665346	0.0262938	-0.665346	1.73024	-0.60247
ENSG00000227170		-0.508629	-0.74996	0.38774	-0.523405	1.73722	-0.328042
ENSG00000229214	LINC00242	0.0569603	-0.729315	-0.0208482	-0.606459	1.81379	-0.692458
ENSG00000229502		0.250903	-1.23004	0.29578	0.688453	0.284561	-0.287621
ENSG00000229896		-0.560107	-0.761939	-0.0360529	-0.358276	1.85125	-0.191853
ENSG00000230615		-0.198422	-0.785352	0.96321	-0.372667	1.45232	-1.09105
ENSG00000230630		-0.586483	-0.916514	0.637161	-0.58455	1.67686	-0.0895839
ENSG00000231131	LNCAROD	-0.202056	-0.747532	0.582236	-0.714966	1.65419	-0.56842
ENSG00000231185	SPRY4-AS1	-0.0159584	-1.37934	1.13482	-0.51333	1.18944	-0.175897
ENSG00000231290	APCDD1L-DT	0.0200483	-0.856326	1.02299	-0.925362	1.50049	-0.674786
ENSG00000232490	OSBPL10-AS1	0.00958028	-1.31825	0.438138	-0.454105	1.14772	0.381934
ENSG00000233621	LINC01137	-0.0034797	-0.48194	0.258079	-0.386248	1.54673	-1.15816
ENSG00000233622	CYP2T1P	0.306375	0.0638753	0.0452215	-0.725804	1.1458	-1.09888
ENSG00000233725	NRAD1	-0.794767	-0.890934	0.128046	-0.252736	1.69974	0.190214
ENSG00000234272		0.865826	-0.851632	-0.0709693	-0.617433	0.943892	-0.383234
ENSG00000234614		-0.671943	-0.494266	0.460453	-0.714585	1.72315	-0.250256
ENSG00000234840	LINC01239	-0.445165	-0.971642	0.145472	-0.513097	1.86171	-0.054552
ENSG00000235138	LOC100130548	0.40285	-0.251659	-0.451946	-0.713035	1.54019	-0.85252
ENSG00000235204	LOC613206	0.443337	-1.03445	0.177335	-0.339892	1.4039	-0.807858
ENSG00000235386		-0.513078	-0.589199	0.201013	-0.360835	1.79231	-0.639947
ENSG00000235750	KIAA0040	-0.322769	-0.833517	-0.0050617	-0.630686	1.90929	-0.158026
ENSG00000235770	LINC00607	-0.606929	-1.0946	-0.211436	-0.341124	1.53988	0.881796
ENSG00000235823	OLMALINC	0.0067573	-0.247349	0.548965	-0.857549	1.55041	-1.15199
ENSG00000235978		-0.187921	-1.0027	0.641948	-0.731107	1.54726	-0.142655
ENSG00000236675	MTX1P1	-0.369429	-0.661385	0.61428	-0.66533	1.6861	-0.60089
ENSG00000236939	BAALC-AS2	0.52702	-0.260952	0.695871	-0.683079	0.724013	-1.10521
ENSG00000237329		0.396946	-1.19847	0.0890584	0.396946	0.480915	-0.190839
ENSG00000237399	PITRM1-AS1	0.453098	-1.4872	0.508273	0.315163	0.324358	0.0178341
ENSG00000237649	KIFC1	-0.135724	-1.06028	1.09198	-0.784066	1.22047	-0.079179
ENSG00000237989	LINC01679	-0.442667	-0.921989	-0.0195743	-0.508497	1.90251	-0.0195743
ENSG00000238273		0.166517	-1.28357	0.395478	-0.215085	1.31132	-0.367725
ENSG00000238279		0.175461	-0.904359	0.297331	-0.802329	1.50185	-0.258167
ENSG00000239677		-0.305023	0.189435	-0.187295	-0.393319	1.26665	-0.823027
ENSG00000240032	LNCSRLR	0.0549855	-0.984367	0.882297	-0.504666	1.32376	-0.735247
ENSG00000240583	AQP1	-0.76616	-0.909815	0.263308	-0.346716	1.86824	-0.057366
ENSG00000241211		0.618986	-1.08323	0.427979	-0.729301	0.956058	-0.111336
ENSG00000241985		-0.285089	-1.0626	1.31314	-0.72568	1.16627	-0.103669
ENSG00000243415		0.0783176	-0.967222	0.994633	-0.716606	1.32357	-0.618709
ENSG00000243649	CFB	0.297392	-1.32259	0.739837	-0.152021	1.09693	-0.632789
ENSG00000243709	LEFTY1	0.408208	-0.200475	0.700908	-0.809158	1.06678	-1.32138
ENSG00000246430	LINC00968	-0.555698	-0.742259	0.220595	-0.578236	1.88962	-0.238503
ENSG00000247081	LOC105369147	-0.396946	-0.917152	0.268991	-0.657049	1.78349	-0.0187824
ENSG00000248288		0.0287552	-0.862654	0.690124	-0.709294	1.57195	-0.728464
ENSG00000248458		-0.295567	-0.588912	0.820774	-0.44224	1.51339	-1.06967
ENSG00000248610	HSPA8P4	-0.547487	-0.580146	-0.477814	-0.599742	1.91502	0.227625
ENSG00000249669		-0.0647186	-0.809246	-0.0410368	-0.651207	1.90063	-0.459577
ENSG00000250107	CACNA1G-AS1	0.275182	-0.918564	0.204125	0.48835	0.850737	-1.13173
ENSG00000250423	KIAA1210	-0.658621	-0.600195	0.0717047	-0.439523	1.78067	-0.181475
ENSG00000250697		0.118989	-0.681588	0.140168	-0.770541	1.78368	-0.74089
ENSG00000250732	RPEP1	0.134779	-0.660747	0.0504053	-0.733068	1.65351	-0.576373
ENSG00000253190		0.310909	-0.143648	-0.583774	-0.576558	1.50141	-0.872381
ENSG00000253676		0.5641	-1.14112	0.529364	-0.487452	1.14672	-0.639027
ENSG00000253837	LOC100507156	0.183922	-1.05157	0.235682	-0.284168	1.61745	-0.856529
ENSG00000254672	LOC100420018	0.398447	-1.13557	-0.502486	-0.58771	0.544544	1.54288
ENSG00000255966		0.417104	-0.546153	-0.419409	-0.216618	1.32966	-0.892588
ENSG00000256268	LINC02454	0.173388	-0.85757	0.877877	-0.806022	1.32033	-0.651378
ENSG00000257859	CASC18	-0.385957	-0.815884	1.35166	-0.762143	1.28001	-0.439698
ENSG00000258086		0.219511	-0.987799	-0.56021	-0.23323	1.55258	-0.174542
ENSG00000258498	DIO3OS	0.420948	-1.55299	1.05594	0.0689689	0.60645	-0.447109
ENSG00000258952		-0.082251	-0.987012	1.00203	-0.73928	1.35029	-0.391019
ENSG00000259721	LOC100131315	-0.699747	-0.757902	0.06319	-0.651977	1.83415	0.304117
ENSG00000259863		-0.0295013	-0.694197	0.120447	-0.712101	1.83702	-0.655404
ENSG00000260121		-0.402816	-0.436096	-0.434512	-0.531182	1.81743	-0.161933
ENSG00000260428	SCX	-0.0052285	-0.849699	0.42984	-0.771129	1.82011	-0.688578
ENSG00000260549	MT1L	-0.215458	-1.3888	0.547314	-0.0578447	1.13301	0.158144
ENSG00000260729		0.982826	-1.15563	0.606616	-0.591316	0.0324009	0.36901
ENSG00000261051		0.225829	-0.89941	1.12906	-0.649655	1.0476	-0.761553
ENSG00000261338		0.938151	-0.685859	0.00622942	-0.788645	0.835365	-0.404912
ENSG00000261625		-0.777818	-0.565685	-0.0235702	-0.318198	1.92687	-0.329983
ENSG00000262061		0.382303	-0.852028	0.30735	-0.746775	1.60228	-0.821727
ENSG00000263528	IKBKE	-0.47832	-0.53063	-0.125227	-0.68756	1.94538	-0.206598
ENSG00000263680		0.291173	-1.20351	-0.0291173	-0.269335	0.397936	1.0741
ENSG00000264577		0.343069	-0.476042	-0.492294	-0.544301	1.679	-0.843342
ENSG00000265190	ANXA8	-0.466252	-0.60122	-0.286295	-0.547233	2.01715	-0.250304
ENSG00000267122		0.846357	-0.502431	-0.217321	-0.699815	1.17533	-0.875267
ENSG00000267287		-0.304827	-0.688434	-0.0139735	-0.632782	1.9193	-0.377043
ENSG00000267519		-0.333818	-0.915244	-0.33757	-0.390106	1.88064	0.0156123
ENSG00000267573	KRT8P5	0.200439	-1.39102	0.559622	-0.247158	0.846969	0.228069
ENSG00000268941	LINC01711	-0.0085053	-0.833625	0.568252	-0.785155	1.72515	-0.698735
ENSG00000269652		0.257534	-1.27222	0.295306	-0.17684	0.710795	0.345668
ENSG00000270412		-0.339142	-0.822733	1.0886	-0.643114	1.4985	-0.679959
ENSG00000270562		-0.173743	-0.72153	0.0575454	-0.672838	1.87133	-0.461838
ENSG00000272195		-0.353577	-0.445244	0.32302	-0.157145	1.28335	-0.759535
ENSG00000272620	AFAP1-AS1	0.672475	-1.28242	0.443197	-0.0274256	0.382861	-0.103851
ENSG00000272636	DOC2B	0.639841	-0.540257	0.520988	-0.768508	1.31499	-1.38241
ENSG00000273259		-0.476108	-0.684825	0.102948	-0.505008	1.98675	-0.530696
ENSG00000273291		-0.0276601	-1.27237	0.977325	-0.414902	0.968105	0.0184401
ENSG00000273447		0.233946	-1.2407	-0.141945	-0.662409	1.30379	0.629114
ENSG00000273703	H2BC14	-0.221532	-0.713261	0.0969499	-0.865759	1.53686	0.254635
ENSG00000273983	H3C8	-0.198135	-0.992007	1.02965	-0.899326	1.23486	0.109825
ENSG00000274641	H2BC17	-0.239498	-0.999536	0.729739	-0.865307	1.35992	0.262819
ENSG00000275549	STPG3-AS1	-0.12207	-0.46934	0.0631399	0.271502	1.1744	-1.20246
ENSG00000275713	H2BC9	-0.233175	-0.877691	0.863975	-0.928158	1.29926	0.122378
ENSG00000275714	H3C1	0.556471	-0.0304092	-0.99786	-1.22821	1.38571	0.0864327
ENSG00000276368	H2AC14	-0.178415	-0.706839	0.168432	-0.92756	1.71565	-0.038879
ENSG00000276672		0.280872	-1.18262	0.612114	-0.568314	0.78677	0.29894
ENSG00000276903	H2AC16	-0.38516	-0.737749	0.114736	-0.940178	1.48803	0.652014
ENSG00000277775	H3C7	-0.16283	-0.930408	0.843872	-0.832119	1.37551	-0.110739
ENSG00000277918		0.862146	-0.0269421	-0.833707	-0.594971	1.2079	-1.09714
ENSG00000278434		0.583253	-1.13593	-0.18498	0.19706	0.907157	-0.55041
ENSG00000278463	H2AC4	0.113782	-0.642217	0.572421	-1.09414	1.30658	-0.151098
ENSG00000278709	NKILA	-0.0773838	-0.704298	0.294547	-0.734972	1.86854	-0.76373
ENSG00000278828	H3C10	-0.0243918	-0.459763	0.300811	-0.948652	1.64043	-0.577646

## Sheet: Cluster 5
Ensembl Gene ID	symbol	WT_TGFβ3	WT_BMP4	V620I_TGFβ3	V620I_BMP4	T89I_TGFβ3	T89I_BMP4
ENSG00000005059	MCUB	0.341646	-1.24933	0.791497	-0.680313	1.26461	-0.360313
ENSG00000006210	CX3CL1	-0.0629603	-0.761517	1.4003	-0.309353	1.03382	-1.26696
ENSG00000006283	CACNA1G	-0.115288	-0.730364	1.101	-0.694858	1.42617	-0.948539
ENSG00000007312	CD79B	0.375025	-1.03555	1.70398	-0.567134	0.295181	-0.460676
ENSG00000010932	FMO1	1.33473	-1.26715	0.500236	-0.545621	0.416421	-0.418078
ENSG00000011201	ANOS1	-0.333291	-0.308744	1.46312	-0.391886	0.884552	-1.26396
ENSG00000011422	PLAUR	1.1777	-1.16298	1.07039	-0.578269	0.401236	-0.853981
ENSG00000013725	CD6	0.98764	-0.565687	1.31741	-0.362275	-0.0294191	-1.35776
ENSG00000028137	TNFRSF1B	-0.190533	-1.06629	1.85496	0.16621	0.389174	-0.919709
ENSG00000046889	PREX2	1.17355	-0.683615	0.988119	-0.514782	0.278371	-1.32615
ENSG00000047365	ARAP2	0.84818	-0.79993	0.937569	-0.964741	0.599567	-0.515003
ENSG00000052344	PRSS8	0.529208	-0.725879	0.88977	0.66958	-1.25434	0.152132
ENSG00000064218	DMRT3	-0.45397	-0.433753	2.26189	-0.170928	-0.352884	-0.37984
ENSG00000068489	PRR11	-0.227598	-0.990508	1.74545	-0.558631	0.747963	-0.373749
ENSG00000069702	TGFBR3	0.145404	-1.0488	1.82072	-0.685891	0.554807	-0.441406
ENSG00000073756	PTGS2	0.548312	-1.03911	1.86757	-0.471629	0.0110123	-0.599025
ENSG00000079215	SLC1A3	1.23797	-0.793885	0.355839	-0.783735	0.718472	-0.860937
ENSG00000083857	FAT1	-0.268165	-0.770982	1.37568	-0.797463	1.19084	-0.514651
ENSG00000084734	GCKR	1.06892	-1.51214	0.524768	0.307842	0.0541481	-0.416472
ENSG00000086967	MYBPC2	-0.184621	-0.902594	1.85828	-0.667292	0.919488	-0.744922
ENSG00000090971	NAT14	1.16671	-0.48162	0.741939	-0.524649	0.431912	-1.53174
ENSG00000091831	ESR1	0.671811	-1.5005	0.888365	-0.0387583	0.265771	-0.0861296
ENSG00000095303	PTGS1	-0.191048	-1.19151	1.64564	-0.147883	0.889528	-0.791084
ENSG00000095464	PDE6C	0.983823	-0.96359	1.34549	-0.601928	-0.435007	0.0101164
ENSG00000100276	RASL10A	0.915414	-0.900319	1.03682	0.106636	0.0423622	-1.25561
ENSG00000100311	PDGFB	1.33749	-1.0538	0.869216	-0.42626	0.383031	-1.18983
ENSG00000100625	SIX4	-0.337363	-0.811777	1.75983	-0.657746	0.938332	-0.601755
ENSG00000100626	GALNT16	1.24994	-0.436479	0.165868	-0.823167	0.884029	-1.33163
ENSG00000101384	JAG1	1.18719	-0.393362	0.700713	-0.909393	0.655868	-1.42111
ENSG00000101938	CHRDL1	1.7258	-0.137555	-0.252243	-0.821816	0.0943978	-0.895525
ENSG00000102755	FLT1	0.83364	-1.40999	0.735635	-0.549103	0.939098	-0.487158
ENSG00000102996	MMP15	0.855882	-0.244971	1.39373	-0.479267	-0.0777186	-1.46563
ENSG00000104327	CALB1	0.510944	-0.66941	0.871506	-0.721302	0.98674	-1.01414
ENSG00000104368	PLAT	0.875507	-0.996429	0.869077	-0.617345	0.953504	-1.15606
ENSG00000104881	PPP1R13L	0.866568	-1.33464	0.558732	-0.137985	0.859564	-0.896736
ENSG00000105825	TFPI2	-0.681452	-1.00566	1.11978	-0.575333	1.38995	0.0435513
ENSG00000106089	STX1A	1.32864	-0.923965	0.49913	-0.716824	0.71618	-1.03784
ENSG00000106327	TFR2	1.64095	-0.771082	0.0451722	-0.472639	0.42422	-1.14044
ENSG00000106366	SERPINE1	0.52223	-0.99901	0.769821	-0.83376	1.30592	-0.763664
ENSG00000106565	TMEM176B	1.507	-0.291358	0.858771	-0.314959	-0.645365	-1.19919
ENSG00000106714	CNTNAP3	0.934461	-0.860148	1.38672	-0.822565	0.39326	-0.913392
ENSG00000109625	CPZ	0.016834	-0.937525	1.64067	0.672065	-0.488834	-0.657389
ENSG00000109743	BST1	-0.152603	-0.776971	1.23261	-0.48014	0.952837	-0.623438
ENSG00000109861	CTSC	-0.57009	-0.753604	1.61073	-0.812242	1.11629	-0.251201
ENSG00000112175	BMP5	-0.779489	-0.690473	1.43505	-0.467306	0.999579	-0.184795
ENSG00000112333	NR2E1	0.757118	-0.871716	1.064	-0.772569	0.679217	-0.786733
ENSG00000112539	C6orf118	0.947921	-0.841509	0.776004	0.12272	-0.0297627	-1.04183
ENSG00000113578	FGF1	1.22311	-0.925969	0.662144	-0.895614	0.774449	-0.896781
ENSG00000114737	CISH	0.864457	-0.945271	1.40893	-0.663649	0.482431	-1.05955
ENSG00000115163	CENPA	-0.59886	-0.906976	1.24074	-0.563758	1.24204	-0.137335
ENSG00000117525	F3	0.876062	-0.705816	0.26175	-1.01736	1.22471	-0.765219
ENSG00000118257	NRP2	1.03678	-0.736938	1.27675	-0.918132	0.552532	-1.18908
ENSG00000118514	ALDH8A1	1.3757	-0.699076	0.62373	-0.435613	-0.205082	-0.671632
ENSG00000119125	GDA	0.539837	-0.974689	0.97947	-0.785373	0.994194	-0.678094
ENSG00000120057	SFRP5	1.70245	-0.22228	0.0307092	-0.944713	0.20956	-1.02406
ENSG00000120659	TNFSF11	0.343371	-1.24844	0.567075	-0.0781535	1.27794	-0.960027
ENSG00000120885	CLU	0.864137	-0.195635	1.11297	-0.708364	0.256329	-1.40159
ENSG00000122420	PTGFR	1.20912	-0.738153	0.6121	-0.887105	0.537019	-0.773272
ENSG00000122694	GLIPR2	0.780333	-0.400717	1.02762	-1.05268	0.746199	-1.12513
ENSG00000123689	G0S2	0.691648	-1.00321	0.309923	-0.914374	1.41762	-0.5655
ENSG00000123892	RAB38	1.11987	-0.970619	1.14707	-0.654496	0.446837	-1.0692
ENSG00000123975	CKS2	1.11463	-0.795934	1.41245	-0.808554	0.0331544	-0.803506
ENSG00000124479	NDP	0.616636	-0.649997	1.7136	-0.774293	0.23783	-0.953831
ENSG00000125148	MT2A	0.955365	-1.06075	0.399027	-0.319802	0.524692	-0.531702
ENSG00000125245	GPR18	1.194	-0.951948	-0.0048169	-0.177023	0.061416	-0.163776
ENSG00000125631		1.15657	-1.06983	0.414438	0.162643	-0.155414	-0.539734
ENSG00000125869	LAMP5	1.91139	-0.354469	-0.250617	-0.599936	-0.212853	-0.741552
ENSG00000127362	TAS2R3	0.932742	-1.1245	0.845939	0.37286	-0.720863	-0.126259
ENSG00000127364	TAS2R4	0.828704	-1.133	0.734963	0.746395	-1.05069	0.0764894
ENSG00000128342	LIF	-0.309193	-1.37824	1.56143	-0.159775	0.905141	-0.305341
ENSG00000128805	ARHGAP22	0.445384	-1.38814	0.888833	-0.470152	1.04429	-0.397334
ENSG00000130055	GDPD2	1.35422	-0.316819	0.728439	-0.410392	-0.0744157	-1.46523
ENSG00000130775	THEMIS2	1.06188	-0.907192	0.429642	-0.819483	0.99829	-0.874301
ENSG00000132386	SERPINF1	1.05901	0.0167934	0.820988	-1.08187	0.37335	-1.3107
ENSG00000132470	ITGB4	-0.292289	-0.817627	1.12621	-0.581237	1.29503	-0.598049
ENSG00000133055	MYBPH	0.874537	-1.0113	0.210608	-0.947736	1.02286	-0.128419
ENSG00000133101	CCNA1	1.49474	-0.446991	0.727674	-0.0393889	-0.703749	-1.13382
ENSG00000135362	PRR5L	1.00132	-0.60505	0.916629	-1.00147	0.834973	-1.22299
ENSG00000135363	LMO2	0.993478	-0.534007	1.23433	-0.339328	-0.137161	-1.21164
ENSG00000135406	PRPH	-0.355102	-0.687648	1.94082	-0.316564	0.448985	-0.727051
ENSG00000136014	USP44	1.51365	-0.305573	0.710635	0.0142127	-0.987783	-1.02331
ENSG00000136158	SPRY2	1.33201	-0.926752	0.922027	-0.715411	0.107563	-0.651904
ENSG00000137331	IER3	-0.0813397	-1.46753	1.60669	-0.0754619	0.750047	-0.440976
ENSG00000137558	PI15	0.83506	-0.699459	1.80842	-0.750143	-0.103375	-0.851201
ENSG00000137709	POU2F3	-0.477289	-0.807391	1.44044	-0.430132	0.858835	-0.29914
ENSG00000137745	MMP13	0.44102	-0.130456	1.87901	-1.00388	0.0836773	-1.06615
ENSG00000137809	ITGA11	1.07729	-0.766514	0.0712387	-1.12984	1.18861	-0.56396
ENSG00000137825	ITPKA	0.966709	-0.78187	1.45243	-0.592102	-0.0431291	-0.851903
ENSG00000137962	ARHGAP29	0.213984	-1.11469	1.90902	-0.680624	0.486018	-0.448604
ENSG00000137968	SLC44A5	0.824798	-0.796225	1.15525	0.209111	-0.305397	-1.06496
ENSG00000138271	GPR87	0.0885905	-0.857031	1.88599	-0.792065	0.70938	-0.75116
ENSG00000139292	LGR5	1.65667	-0.591723	0.151257	-0.802945	0.11976	-0.660277
ENSG00000139354	GAS2L3	0.417993	-0.707373	1.63312	-0.952542	0.508424	-0.655124
ENSG00000140279	DUOX2	0.20322	-0.863016	0.374798	1.54888	-0.524762	-0.860564
ENSG00000140853	NLRC5	1.15637	-0.509355	0.918837	-0.856753	0.0785492	-0.743923
ENSG00000141068	KSR1	1.05574	-0.554622	1.0987	-0.289773	0.105288	-1.52087
ENSG00000141469	SLC14A1	0.799379	-0.896452	1.79271	-0.762098	0.127608	-0.817297
ENSG00000141574	SECTM1	-0.194448	-0.525367	2.24131	-0.269657	-0.260632	-0.574503
ENSG00000141750	STAC2	1.75761	-0.824506	-0.386329	-0.636716	0.243116	-0.333006
ENSG00000141753	IGFBP4	-0.701626	-0.858941	1.97426	-0.319531	0.708202	-0.41173
ENSG00000142178	SIK1	0.510141	-0.888024	1.6186	-0.654996	0.466055	-0.862831
ENSG00000142945	KIF2C	-0.276053	-0.970251	1.39272	-0.755177	1.16771	-0.281022
ENSG00000143473	KCNH1	1.35086	-0.406366	0.0190454	-0.765507	0.376049	-0.759094
ENSG00000143603	KCNN3	1.28738	-0.775998	0.913686	-0.795803	0.459212	-1.14673
ENSG00000144407	PTH2R	0.676256	-0.258677	1.2047	-0.665169	0.290088	-1.26136
ENSG00000144481	TRPM8	0.828341	-0.490952	1.19413	-0.318334	0.00224179	-1.22252
ENSG00000144749	LRIG1	0.962097	-0.349061	0.663096	-1.08399	0.965765	-1.32285
ENSG00000145794	MEGF10	0.561778	-0.386586	1.45005	-0.98615	0.447132	-0.964949
ENSG00000145864	GABRB2	0.389522	0.351604	1.61343	-0.608987	-0.501552	-1.12088
ENSG00000146001	PCDHB18P	1.48498	-0.560907	0.25386	-0.162497	-0.668586	-0.377854
ENSG00000146276	GABRR1	1.42704	-0.866925	0.574311	-0.2544	-0.566668	-0.226376
ENSG00000146592	CREB5	1.06244	-1.0332	0.780844	-0.64345	0.705326	-0.902326
ENSG00000146648	EGFR	-0.380135	-0.690839	1.34155	-0.739617	1.25892	-0.60598
ENSG00000147454	SLC25A37	0.702628	-0.942136	0.392411	-0.48929	1.22326	-1.05169
ENSG00000147485	PXDNL	0.832605	-0.875054	1.26174	-0.354751	0.312303	-1.14855
ENSG00000147655	RSPO2	0.554264	-0.312109	1.06799	-0.368481	0.458487	-1.51087
ENSG00000148704	VAX1	0.839505	-0.55056	1.18324	0.346173	-0.633638	-1.18521
ENSG00000149948	HMGA2	0.643075	-1.02902	1.16828	-0.761333	0.815963	-0.726533
ENSG00000150048	CLEC1A	-0.197266	-0.999194	1.54811	-0.433127	0.958454	-0.653264
ENSG00000151572	ANO4	0.892476	-0.161445	0.491377	-0.717451	0.647667	-1.37304
ENSG00000151952	TMEM132D	0.720858	0.0779306	1.44576	-0.266369	-0.624722	-1.32269
ENSG00000152078	TLCD4	0.377508	-0.961201	1.82601	-0.551824	0.15635	-0.520454
ENSG00000152086	TUBA3E	1.06623	-0.863778	0.150711	-0.121469	0.435263	-0.839035
ENSG00000152377	SPOCK1	1.24108	-0.27486	0.93834	-0.770633	-0.0004591	-1.19851
ENSG00000152495	CAMK4	1.45727	-0.731533	0.822968	-0.219841	-0.458388	-0.886315
ENSG00000154127	UBASH3B	1.35849	-0.626458	0.764259	-0.534716	0.0574332	-1.10393
ENSG00000154162	CDH12	0.70616	-1.08192	-0.535794	0.30696	0.43171	0.0519161
ENSG00000154479	CCDC173	1.45787	-0.658959	0.57693	0.0594813	-0.665374	-0.834293
ENSG00000154529	CNTNAP3B	1.10395	-0.840394	0.875378	-0.862095	0.726369	-1.04582
ENSG00000154721	JAM2	1.28038	-0.293516	1.19688	-0.700768	-0.182577	-1.33491
ENSG00000154914	USP43	0.819092	-0.926061	1.23996	-0.655033	0.448908	-0.822497
ENSG00000156265	MAP3K7CL	1.41346	-0.761577	0.0300439	-0.688564	0.191442	-0.236392
ENSG00000156925	ZIC3	0.653362	-0.520868	1.61694	0.0201804	-0.489333	-1.16807
ENSG00000157388	CACNA1D	0.983662	-0.693416	1.20552	-0.643993	0.334577	-1.17996
ENSG00000158055	GRHL3	0.749949	-0.805586	0.329189	-0.996841	1.27271	-0.622832
ENSG00000158714	SLAMF8	0.751576	-1.32222	-0.102066	0.668067	-0.514969	0.658789
ENSG00000158859	ADAMTS4	-0.205786	-0.883196	1.26341	-0.654437	1.27937	-0.644684
ENSG00000160013	PTGIR	0.69342	-1.23195	0.878342	-0.143025	0.543993	-0.694929
ENSG00000160180	TFF3	0.884074	-0.608225	0.023515	-0.702737	0.978586	-0.759113
ENSG00000160229	ZNF66	1.10087	-0.820867	0.352066	-0.741891	0.416416	-0.291438
ENSG00000160870	CYP3A7	-0.581157	-0.0825244	2.14641	-0.018597	-0.402161	-0.700488
ENSG00000161381	PLXDC1	1.24664	-0.406517	1.17946	-0.22543	-0.502903	-1.32851
ENSG00000161940	BCL6B	0.787087	-1.43322	0.853242	0.799491	-0.788215	-0.0067658
ENSG00000162840		1.08219	-0.885333	0.137422	-0.462434	0.695287	-0.710375
ENSG00000162877	PM20D1	0.430356	-1.35929	0.305273	0.40149	-0.464469	1.01728
ENSG00000163354	DCST2	1.25882	-0.0312347	0.187015	-0.147923	0.0465573	-1.68864
ENSG00000163623	NKX6-1	-0.214789	-0.884059	1.70633	-0.54769	0.575852	-0.278749
ENSG00000163827	LRRC2	0.682159	-0.661612	0.427377	-0.715034	1.10132	-0.969817
ENSG00000163885	CFAP100	0.98127	-0.928369	-0.103318	0.546889	0.128899	-0.868266
ENSG00000163909	HEYL	1.51749	-0.0653373	0.129919	-0.746658	0.304404	-1.47645
ENSG00000164089	ETNPPL	0.451986	-0.437713	1.62081	-0.516216	-0.319959	-0.524938
ENSG00000164251	F2RL1	0.674809	-1.33924	0.182231	0.53217	0.224072	-0.304641
ENSG00000164488	DACT2	0.797249	-0.663204	0.940018	0.116172	0.074044	-1.37237
ENSG00000164509	IL31RA	0.256583	-1.03663	0.65335	-0.90253	1.4947	-0.402847
ENSG00000164611	PTTG1	-0.0450229	-0.959941	1.43998	-0.959941	1.11244	-0.303366
ENSG00000164746	C7orf57	0.200629	-1.11235	1.16906	0.70347	-0.0507921	-0.823678
ENSG00000164877	MICALL2	0.430669	-0.961699	0.407545	-0.0732455	1.27757	-1.30527
ENSG00000164929	BAALC	0.928013	-0.77561	0.919704	-0.854541	0.931412	-1.2254
ENSG00000165478	HEPACAM	1.22503	-0.262863	0.122108	-0.772879	0.491623	-1.02999
ENSG00000165905	LARGE2	0.0242231	-1.05888	1.77007	-0.62259	0.843926	-0.685643
ENSG00000168309	FAM107A	1.41184	-0.801273	0.578338	-0.844936	0.379575	-0.771947
ENSG00000168348	INSM2	1.09657	-0.570268	1.41096	-0.580557	-0.319899	-0.912096
ENSG00000168497	CAVIN2	0.616946	-0.023281	0.958401	-1.32508	-0.0659628	0.104764
ENSG00000168658	VWA3B	0.901722	-1.08207	0.197567	0.665812	0.11893	-1.00343
ENSG00000168685	IL7R	0.45382	-0.538154	1.08299	-0.965254	0.958991	-0.962192
ENSG00000169908	TM4SF1	0.639361	-1.21951	1.47597	-0.693071	0.483737	-0.423336
ENSG00000170382	LRRN2	0.314848	-0.481596	1.10671	-0.216947	0.5899	-1.38165
ENSG00000170549	IRX1	1.29891	-0.407447	1.30465	-0.255597	-0.778461	-1.11451
ENSG00000170571	EMB	0.770713	-0.896251	1.12635	-1.02941	0.829896	-0.69295
ENSG00000170893	TRH	-0.148455	-0.417412	2.24648	-0.173315	-0.350617	-0.793415
ENSG00000171223	JUNB	0.948254	-1.0308	0.896241	-0.752171	0.953638	-1.0548
ENSG00000171476	HOPX	1.25873	-0.655409	-0.218083	-1.00758	0.720436	-0.203485
ENSG00000171786	NHLH1	1.26454	-0.677434	1.26454	-0.429041	-0.496785	-0.81292
ENSG00000172164	SNTB1	1.39484	-0.806093	0.494779	-0.937353	0.602599	-0.833439
ENSG00000172543	CTSW	1.42598	-0.734917	0.0432648	-0.271867	0.422709	-1.16581
ENSG00000173157	ADAMTS20	0.556656	-1.30693	0.616506	0.538082	-0.17392	-0.101688
ENSG00000173258	ZNF483	1.33358	-0.730306	1.23352	-0.0106653	-0.959699	-0.744069
ENSG00000173846	PLK3	0.978224	-1.20862	0.974581	-0.314103	0.617575	-1.07201
ENSG00000174576	NPAS4	0.95136	-0.490095	1.42992	-0.311354	-0.513158	-0.945595
ENSG00000175063	UBE2C	0.065962	-0.984521	1.66174	-0.847172	0.79628	-0.369134
ENSG00000175264	CHST1	0.910339	-0.673376	0.42894	-0.953599	1.2534	-1.14463
ENSG00000175592	FOSL1	0.484228	-1.1536	1.74521	-0.092234	-0.482872	-0.0859042
ENSG00000175718	RBMXL3	1.15434	-0.931977	0.806623	-0.176585	-0.35644	-0.392411
ENSG00000175745	NR2F1	0.875246	-0.300009	1.36269	-0.228633	-0.409517	-1.2788
ENSG00000175832	ETV4	1.03066	-0.953766	1.32453	-0.482058	0.0872437	-0.900631
ENSG00000176381	PRR18	1.17673	-0.556252	0.185821	-0.049687	0.130277	-1.12058
ENSG00000177103	DSCAML1	1.36192	-0.492194	0.347578	-0.471023	0.460488	-1.49316
ENSG00000177374	HIC1	1.1975	-1.15726	1.0592	-0.19756	0.195702	-1.11036
ENSG00000177989	ODF3B	1.0817	-0.60672	0.642978	0.0136975	0.29909	-1.69334
ENSG00000178342	KCNG2	1.28072	-1.04808	-0.531987	0.410623	-0.126793	-0.156649
ENSG00000178538	CA8	0.0758939	-0.512513	1.92661	-0.321406	0.111098	-1.06404
ENSG00000178999	AURKB	-0.083355	-1.12143	1.34988	-0.712946	1.08214	-0.235756
ENSG00000179431	FJX1	1.15562	-0.392588	1.33826	-0.251951	-0.549065	-1.28761
ENSG00000180043	FAM71E2	1.07487	-0.929818	0.311179	0.0111578	0.317998	-0.943456
ENSG00000180210	F2	-0.480974	-0.69863	1.83511	-0.556316	0.933789	-0.765601
ENSG00000180525	DIP2C-AS1	0.193934	-1.33646	0.737189	0.545062	-0.0710689	0.154183
ENSG00000181634	TNFSF15	-0.245972	-0.778444	1.84676	-0.643778	0.854571	-0.761933
ENSG00000181885	CLDN7	1.07544	-0.860608	0.368401	0.0931786	0.335184	-1.22599
ENSG00000182010	RTKN2	1.56776	-0.414465	-0.145764	-0.678762	0.140558	-0.674357
ENSG00000182379	NXPH4	0.737721	-1.37622	1.22569	-0.184131	0.650804	-0.99659
ENSG00000183117	CSMD1	-0.308567	-0.704294	1.06522	-0.739684	1.34834	-0.526271
ENSG00000183535	COL18A1-AS1	0.762114	-0.767791	0.569575	-0.455566	0.668447	-0.845847
ENSG00000184274		1.14599	-0.722761	0.397394	-0.722761	0.670603	-0.89215
ENSG00000184599	TAFA3	1.22762	-1.00749	0.66884	0.0634975	-0.262456	-0.697061
ENSG00000184613	NELL2	1.11547	-0.396153	1.26366	-0.641831	-0.17134	-1.13852
ENSG00000184786	DYNLT2	1.07459	-1.19858	0.643272	-0.0619957	-0.516631	0.293552
ENSG00000184845	DRD1	0.704236	-0.792859	1.71971	-0.775451	-0.14876	-0.369262
ENSG00000184985	SORCS2	1.0423	-0.502762	1.18223	-0.582917	0.247314	-1.45415
ENSG00000185274	GALNT17	1.25479	-0.560724	1.14518	-0.759244	0.154057	-1.26368
ENSG00000185303	SFTPA2	1.22631	-0.10623	0.952968	-0.721249	-0.557244	-0.741749
ENSG00000185467	KPNA7	0.906207	-0.328993	0.198315	-0.0689505	0.516144	-1.56419
ENSG00000185739	SRL	-0.297454	-0.882688	1.47598	-0.701797	1.22416	-0.598938
ENSG00000186832	KRT16	1.43962	-0.517795	-0.384092	-0.385429	0.56921	-1.09004
ENSG00000186897	C1QL4	-0.182024	-1.13986	1.28549	-0.5879	1.26916	-0.431323
ENSG00000187193	MT1X	0.890336	-1.06985	0.389052	-0.259979	0.574689	-0.569311
ENSG00000187678	SPRY4	0.346106	-1.20834	1.69801	-0.380414	0.551071	-0.775907
ENSG00000187764	SEMA4D	1.31344	-0.338852	0.612177	-0.849549	0.506131	-1.45373
ENSG00000187955	COL14A1	-0.216661	-1.14843	2.00695	-0.161513	0.406083	-0.512927
ENSG00000188064	WNT7B	1.04	-0.106144	1.44869	-0.400478	-0.770832	-1.13209
ENSG00000188766	SPRED3	1.49213	-1.05029	0.532858	-0.514255	0.369153	-0.928509
ENSG00000189143	CLDN4	0.760744	-0.984208	1.67853	-0.473549	0.193615	-1.00733
ENSG00000196616	ADH1B	-0.0750499	-1.07023	1.64516	-0.602798	0.886206	-0.495992
ENSG00000196668	LINC00173	0.658588	-0.679241	1.04844	0.397753	-0.182814	-1.30749
ENSG00000197057	DTHD1	0.734112	-1.1445	0.0237907	0.145293	-0.05098	0.397644
ENSG00000197261	C6orf141	0.403	-0.178635	1.38811	-0.493032	-0.162915	-0.812669
ENSG00000197301	HMGA2-AS1	0.572091	-0.901796	0.962184	-0.747231	0.621773	-0.355299
ENSG00000197769	MAP1LC3C	0.534309	-0.905536	1.57131	-0.707263	0.661771	-1.01569
ENSG00000197872	CYRIA	0.861119	-0.611735	0.711337	-0.988963	0.976229	-1.02687
ENSG00000197971	MBP	1.27568	-0.682584	-0.107094	-0.857121	1.08558	-0.988301
ENSG00000198156	NPIPB6	1.08649	-0.918516	0.129855	0.300215	-0.30915	-0.341912
ENSG00000198517	MAFK	0.757112	-0.84896	0.657249	-0.823708	1.22121	-1.06479
ENSG00000198535	C2CD4A	0.556315	-0.97355	1.25625	-0.223617	0.106354	-0.543588
ENSG00000198759	EGFL6	1.01838	-1.08581	0.916019	-0.475966	0.179298	-0.430551
ENSG00000198774	RASSF9	0.3299	-0.79481	1.08799	-0.670533	0.976143	-0.875591
ENSG00000198795	ZNF521	0.899746	-0.691836	1.10799	-0.826327	0.648385	-1.14794
ENSG00000198805	PNP	0.21027	-1.007	0.637141	-0.822812	1.55349	-0.549071
ENSG00000198857		1.49369	-0.802289	0.114509	0.0108711	0.15437	-1.2567
ENSG00000198914	POU3F3	0.614373	-1.46565	1.24665	0.082127	0.189524	-0.473809
ENSG00000204277	LINC01993	1.1714	-0.783017	0.621413	-0.321421	0.199102	-0.976167
ENSG00000204287	HLA-DRA	-0.435565	-0.61705	1.59707	-0.49606	0.786436	-0.580753
ENSG00000204335	SP5	0.845073	-0.640829	1.59793	-0.260438	-0.521957	-0.827062
ENSG00000204428	LY6G5C	1.5155	-0.83562	-0.221257	-0.599326	0.534882	-0.599326
ENSG00000204930	FAM221B	1.44325	-0.697613	0.470131	-0.308365	-0.419579	-0.493721
ENSG00000204965	PCDHA5	0.0136368	-1.07049	1.74097	0.565927	-0.518199	-0.395467
ENSG00000205129	C4orf47	0.569595	-1.17361	1.0697	0.301684	0.287396	-1.04978
ENSG00000205560	CPT1B	1.19656	-0.0296216	0.261917	-0.0296216	-0.149667	-1.57878
ENSG00000205929	C21orf62	0.915655	-0.545057	0.465789	-0.489499	0.759398	-1.31978
ENSG00000206952		0.615999	-1.26977	0.509458	0.0406791	-0.342867	0.765155
ENSG00000212743		1.02625	-1.06245	0.801394	0.644267	-0.761743	-0.596489
ENSG00000213871		1.14372	-0.919709	0.315676	0.482619	-0.959775	0.0218545
ENSG00000215097		1.3218	-0.875477	0.183106	0.377657	-0.63515	-0.434877
ENSG00000215440	NPEPL1	0.125822	-1.18664	0.590353	-0.0006508	1.36192	-0.99096
ENSG00000215475	SIAH3	1.27598	-0.546513	0.821078	-0.49037	-0.0023557	-1.13674
ENSG00000215612	HMX1	0.577027	-0.940682	1.58319	-0.641654	0.373913	-0.74133
ENSG00000219163		0.586507	-0.621322	1.0284	-0.974833	0.291914	-0.0714163
ENSG00000220785		1.02452	-0.562084	0.618573	-0.621645	0.793877	-1.46479
ENSG00000221491	SNORA2C	1.21245	-0.0400047	0.0164122	-0.717008	0.467748	-1.24733
ENSG00000222024		1.49637	-1.31478	0.602469	-0.510277	-0.251356	0.170933
ENSG00000223374		0.921139	-0.922362	0.907683	-0.276464	0.0599413	-0.617355
ENSG00000223403	MEG9	0.5101	-0.577767	0.433759	0.0520511	0.653241	-1.28393
ENSG00000224019	RPL21P32	1.42515	-0.643296	0.452617	-0.273153	-0.512657	-0.447338
ENSG00000224310	LINC01567	1.31405	-0.795992	0.561932	-0.102912	-1.01162	0.23336
ENSG00000224574	COL18A1-AS2	0.763933	-0.44632	0.672593	-0.948689	0.946613	-1.09331
ENSG00000224597	SVIL-AS1	0.600751	-1.35169	0.37547	0.37547	0.0750939	0.0250313
ENSG00000224945		1.60196	-0.209757	0.603405	-0.0610747	-0.964179	-1.09267
ENSG00000224969		1.31771	-0.624181	0.531709	0.381444	-0.554827	-1.22524
ENSG00000225216		0.940667	-0.628397	0.643817	-0.967654	1.02548	-1.13728
ENSG00000226239		1.17963	-0.452021	0.867609	0.1577	-0.529309	-1.34227
ENSG00000226496	LINC00323	0.964189	-0.98282	1.45948	-0.342357	-0.624161	-0.145948
ENSG00000226807	MROH5	1.51375	-0.644745	-0.171932	0.341995	-0.613909	-0.624188
ENSG00000227292		0.121872	-0.696411	2.06602	0	-0.174103	-1.06783
ENSG00000227512		0.689513	-1.0864	0.849839	-0.401936	0.893004	-0.975409
ENSG00000229447		0.851106	-0.748758	1.1803	0.021547	-0.748758	-0.347146
ENSG00000229728		1.00756	-1.00006	0.265017	0.15501	-0.175011	-0.248349
ENSG00000229847	EMX2OS	0.466721	-0.598409	0.367308	-0.172357	0.818213	-1.05286
ENSG00000230498		0.662061	-0.766191	0.515936	-0.935884	1.25599	-0.803901
ENSG00000230838		1.15752	-0.695446	-0.455852	-0.835468	1.27421	-0.745232
ENSG00000231793		0.662856	-0.240088	-0.416152	0.102205	0.946133	-1.54532
ENSG00000231881		1.10403	-1.00599	-0.709025	-0.232316	1.10403	-0.583986
ENSG00000231887	PRH1	0.751765	-1.14683	1.24399	-0.281912	-0.281912	0.0345198
ENSG00000232352	SEMA3B-AS1	0.993585	-0.437851	0.291901	-0.134723	0.319968	-1.27987
ENSG00000232545		0.886288	-1.28878	0.382084	0.179667	-0.493832	0.573461
ENSG00000232564	MRTFA-AS1	1.12149	-1.08143	0.8963	-0.200266	-0.303069	-0.278592
ENSG00000232684	ATP11A-AS1	0.50116	-1.26936	0.890139	0.380443	-0.384101	0.139008
ENSG00000232811		1.2739	-0.572505	1.19697	-0.539534	-0.407648	-0.869249
ENSG00000233334		0.90187	-1.25478	-0.162075	0.067967	0.125478	0.37469
ENSG00000233469	ST6GALNAC4P1	0.985508	-1.00385	0.274335	0.408881	-0.0524206	-0.725152
ENSG00000233639	PANTR1	1.04772	-0.926102	1.16834	-0.619063	0.203364	-0.776238
ENSG00000233929		1.09518	-0.984594	0.0477479	-0.302403	0.609197	-0.604258
ENSG00000233993	DTD1-AS1	0.915964	-1.54436	-0.125442	0.837858	-0.294671	0.23905
ENSG00000234219		0.959162	-0.656724	0.94332	0.103693	-0.918117	-0.260673
ENSG00000234271		1.23976	-1.05676	0.757777	0.105676	-0.121141	-0.981158
ENSG00000234329	RPL7AP16	0.256832	-1.49276	0.338097	0.601013	-0.288121	0.892611
ENSG00000234473	ZNF101P2	1.63109	-0.976853	0.536194	-0.052519	-0.382638	-0.828299
ENSG00000234869		0.952702	-1.01684	0.634244	-0.487709	0.732231	-0.874758
ENSG00000235162	C12orf75	0.409639	-1.35056	1.52032	-0.612292	0.645643	-0.310226
ENSG00000235290		1.25037	-1.29374	0.190326	0.415586	-0.379448	-0.18069
ENSG00000235313		0.495831	-1.50183	0.70173	0.955818	-0.174437	-0.40224
ENSG00000235314		1.52541	-0.323883	0.821337	-0.159776	-0.800322	-1.14324
ENSG00000236094	LINC00545	0.89609	-0.398262	0.711182	-0.995655	0.725406	-1.01462
ENSG00000236714	LINC01844	-0.469232	-0.968877	1.73789	-0.199858	0.777708	-0.590884
ENSG00000237082		1.10892	-0.750957	0.717954	-0.0807317	-0.415845	-0.533134
ENSG00000237154		1.39152	-0.640908	0.142424	0.0577394	-0.323341	-0.789106
ENSG00000237187	NR2F1-AS1	1.06026	-0.532211	1.26364	0.0764066	-0.646613	-1.20744
ENSG00000237412	PRSS56	0.648474	-0.366975	0.861594	-0.59263	0.410283	-0.993796
ENSG00000237586		1.56807	-0.444902	0.299959	-0.574176	-0.167888	-0.808099
ENSG00000237704		1.14982	-0.831192	-0.170856	0.159312	-0.678807	0.438685
ENSG00000237928	NFIA-AS2	0.178056	-0.348138	2.00025	-0.640468	-0.187357	-0.669701
ENSG00000238086	PPP1R26P1	1.49514	-1.14335	-0.117266	6.94e-18	0.263849	-0.703597
ENSG00000239291	RPS2P47	1.2589	-1.10452	0.0742715	0.0159153	-0.0190984	-0.275865
ENSG00000239377		1.34872	-0.655513	-0.340671	-0.747662	0.496347	-0.248523
ENSG00000239922		0.664271	-0.638367	0.650702	-0.251646	0.593033	-1.14043
ENSG00000240031	OR9A3P	0.709442	-1.07959	0.678596	0.493525	-0.987049	0.472961
ENSG00000240086		0.216751	-1.33407	0.666876	0.955238	-0.374039	0.0479537
ENSG00000241749	RPSAP52	0.202712	-0.835841	1.64854	-0.66784	0.508169	-0.591476
ENSG00000242540		1.58281	-0.257451	-0.260859	-0.308569	-0.298346	-0.69707
ENSG00000243384		-0.294572	-0.978453	1.41513	-0.571381	0.959209	-0.234868
ENSG00000243620		0.747786	-0.916091	1.11493	0.349393	-0.283349	-0.978585
ENSG00000243667	WDR92	0.609235	-1.19087	1.00685	-0.128156	-0.19322	0.197164
ENSG00000244357	RN7SL145P	1.60606	-0.591572	0.435895	-0.505949	-0.505949	-0.439354
ENSG00000244513		1.14226	-1.47919	0.509499	-0.0974387	0.0187834	0.0446105
ENSG00000244953		1.93036	-0.487465	-0.151656	-0.474466	-0.42247	-0.576292
ENSG00000245067	IGFBP7-AS1	0.0523925	-0.981004	1.30439	0.0325195	0.668456	-1.00088
ENSG00000246130	LOC286059	0.797631	-0.859318	1.22896	-0.0545144	-0.433246	-0.496368
ENSG00000249609		1.34694	-0.576587	0.854302	-0.791963	-0.0418599	-0.769682
ENSG00000250130		0.721586	-1.02687	0.740088	0.305286	-0.388546	-0.222026
ENSG00000250579	CTD-2297D10.2	0.37095	-0.847885	1.14818	-0.450439	0.741899	-0.900878
ENSG00000251095		-0.608872	-1.06374	1.66549	0.740058	-0.310853	-0.007605
ENSG00000253223	LOC100288001	0.364268	-0.528275	1.58598	-0.965052	0.0604236	-0.16113
ENSG00000253476		0.855571	-1.23582	0.476695	0.537315	-0.371987	-0.190127
ENSG00000254206	NPIPB11	1.02291	-1.2776	0.445882	0.499029	-0.639833	0.0814459
ENSG00000254512		1.19568	-1.13266	-0.0484735	0.306999	-0.386172	0.0700173
ENSG00000254577		0.742465	-0.885296	1.17182	0.615075	-0.927759	-0.564462
ENSG00000254884		0.760199	-1.16415	0.386991	0.795188	-0.831766	0.200387
ENSG00000255374	TAS2R43	0.964275	-1.10539	1.05051	0.218587	-0.5271	-0.45101
ENSG00000255418		0.480279	-1.16508	1.03246	-0.0569823	0.312385	-0.459928
ENSG00000255690	TRIL	1.14083	-0.72832	0.614241	-0.609306	0.744948	-1.3451
ENSG00000255986	MT1JP	0.522096	-0.892366	0.345998	-0.756032	1.23785	-0.494726
ENSG00000256235	SMIM3	1.03098	-1.33669	0.988318	-0.301532	0.488132	-0.829506
ENSG00000256533	LOC100422382	0.960408	-1.12613	0.440603	-0.511153	0.5431	-0.262232
ENSG00000256802	LOC100130111	1.11175	-0.741169	0.655977	-0.472815	0.613381	-1.33751
ENSG00000256973		1.2689	-0.781222	0.431769	0.158419	-0.439534	-0.70719
ENSG00000257017	HP	1.03125	-1.08625	0.851192	-0.56768	-0.0275001	0.0157143
ENSG00000257438		0.477094	-1.35362	-0.0110952	-0.133142	0.812724	0.273682
ENSG00000257497		0.555797	-1.30491	0.783639	0.669718	-0.165703	-0.456835
ENSG00000258424		1.44774	-0.787365	0.0880494	-0.312406	-0.144774	-0.358971
ENSG00000258485		0.694342	-1.16802	0.240959	-0.0589715	0.233984	0.157257
ENSG00000258667	HIF1A-AS3	0.928502	-1.36702	0.284825	-0.203749	0.377887	0.0676812
ENSG00000258959		0.892419	-1.22824	0.288145	0.0715179	0.208335	-0.213517
ENSG00000259031		0.628773	-1.40007	0.321373	-0.0167673	0.490443	0.0754527
ENSG00000259367		-0.0415446	-0.88337	0.832351	-0.161805	1.06485	-0.803196
ENSG00000259571	BLID	0.70516	-1.2048	0.224423	0.549245	-0.347264	0.172451
ENSG00000259762		1.13474	-1.07922	1.02023	-0.201269	-0.353956	-0.353956
ENSG00000259881	LOC101927793	1.88878	-0.432183	0.159046	-0.451963	-0.425589	-0.931101
ENSG00000259895	LOC729652	1.062	-0.271719	-0.0916092	-0.408511	0.514835	-1.10387
ENSG00000259915		1.34816	-0.779185	0.125193	-0.0084085	-0.0392395	-0.820293
ENSG00000259986		1.22283	-1.1153	0.938589	-0.262572	-0.180049	-0.491801
ENSG00000259994		1.3169	-0.623702	0.92486	0.0329671	-0.662906	-1.00921
ENSG00000260558		0.63927	-1.21214	0.571328	0.894051	-0.36287	-0.515739
ENSG00000260589	STAM-AS1	1.38445	-0.804809	-0.240184	-0.772849	0.361728	0.0154957
ENSG00000260641		1.04529	-1.05819	-0.290061	-0.620945	0.548967	0.403221
ENSG00000261087	ZNNT1	1.43523	-0.41861	0.949575	-0.0978569	-0.831784	-1.06555
ENSG00000261409		0.663216	-0.504418	1.69385	-0.354961	-0.551123	-0.697467
ENSG00000261594	TPBGL	1.01081	-1.19078	0.598365	-0.269187	0.643876	-0.857984
ENSG00000261604		1.42233	-0.512135	0.877719	-0.0219826	-1.02843	-0.690768
ENSG00000263155	MYZAP	1.84143	-0.751481	-0.359959	-0.59635	-0.0644702	-0.212215
ENSG00000263990		1.35498	-0.682498	0.131271	0.400488	-0.443874	-0.97007
ENSG00000264434		0.73534	-0.898749	0.453914	-0.299583	0.490227	-0.490227
ENSG00000265293		0.760717	-0.962083	0.699189	0.330017	-0.377562	-0.367307
ENSG00000265478		1.10829	-1.14837	-0.102182	0.252312	0.0966802	-0.309691
ENSG00000266970	LOC101928674	0.254527	-0.876372	1.22439	-0.525025	0.825466	-0.795855
ENSG00000267337	LINC01478	-0.597619	-0.955009	2.03768	-0.169834	-0.0019691	0.261561
ENSG00000268041	ERFL	1.05591	-1.13007	0.847075	0.618711	-0.422445	-1.00988
ENSG00000268812	LOC91370	0.599917	-1.01058	1.29387	-0.480291	0.344595	-0.565398
ENSG00000268903		0.773366	-1.08647	0.773366	0.480614	-0.897042	0.199343
ENSG00000269365		1.37178	-0.805472	-0.492997	-0.533316	0.0714753	0.353711
ENSG00000269707		0.290982	-1.33624	1.04797	-0.281228	0.827428	-0.382557
ENSG00000270069		0.539646	-1.13404	1.25657	-0.563109	0.195524	0.0260699
ENSG00000270228		1.64512	-0.0663858	-0.340227	-0.0663858	-0.180486	-1.43559
ENSG00000270580	PKD1P6-NPIPP1	0.655983	-0.696982	0.468072	0.0922477	0.723632	-1.50125
ENSG00000270606	PPIAP52	1.31821	-1.00731	-0.232138	0.251207	-0.378053	-0.013265
ENSG00000270823		0.762541	-1.23799	0.672041	0.562488	-0.437779	-0.204383
ENSG00000270953		0.52694	-0.790107	1.55874	0.252834	-0.629654	-0.705423
ENSG00000271327		1.02975	-1.09299	0.690823	0.441089	-0.236761	-0.878934
ENSG00000272072		0.442336	-1.19965	1.11018	0.156119	-0.416316	0.246503
ENSG00000272097		0.793588	-0.999394	0.443443	1.1377	-0.474177	-1.05373
ENSG00000272240		1.2547	-0.784865	0.495641	-0.230419	-0.0522043	-0.745262
ENSG00000272663		1.5343	-0.623212	-0.0316351	-0.101232	-0.623212	-0.217228
ENSG00000272812		1.53046	-0.686332	0.589371	-0.456287	-0.644506	-0.247156
ENSG00000273108		1.35197	-0.770466	0.161456	0.151698	-0.404528	-0.599695
ENSG00000273129	PACERR	-0.212824	-1.42913	1.78819	-0.0689596	0.20569	0.218768
ENSG00000273253		0.733697	-0.390408	0.260272	0.195204	0.28944	-1.36418
ENSG00000273448		0.566886	-1.21976	0.263273	0.391725	-0.414018	0.636951
ENSG00000273771		0.52421	-0.845047	0.723491	1.14134	-0.729335	-0.845047
ENSG00000273796		0.65956	-1.19424	0.908512	-0.527406	1.00631	-0.83415
ENSG00000274317		0.107907	-1.02705	1.69212	0.717949	-0.620359	-0.596714
ENSG00000274397		1.06638	-0.878411	0.800247	0.227047	-0.796525	-0.291563
ENSG00000274421		0.112839	-1.43869	-0.0423145	0.675269	0.171021	0.681734
ENSG00000274460		1.33306	-0.789081	0.179217	-0.667319	0.150226	-0.21506
ENSG00000274554		0.371505	-1.24872	0.857572	0.587535	-0.528618	0.233486
ENSG00000274614	SALL4P4	0.8492	-1.10348	0.8492	0.664487	-0.760441	-0.38222
ENSG00000275620	FLJ16779	0.529665	-1.01501	1.73805	0.0517816	-0.191987	-0.903984
ENSG00000275993	SIK1B	0.417025	-0.917832	1.79053	-0.489727	0.415538	-1.02387
ENSG00000277151		0.82612	-0.895688	0.964289	-0.587463	0.666693	-0.977172
ENSG00000277182		1.29934	-0.302942	0.38188	0.257367	-0.381582	-1.5448
ENSG00000277702		1.07944	-1.36231	0.96059	-0.281891	0.150276	-0.40794
ENSG00000278330		0.798093	-1.37356	0.366843	-0.495657	0.890503	-0.126015
ENSG00000278829		1.2538	-0.692282	0.943555	-0.184609	-0.396139	-0.917915

## Sheet: Cluster 6
Ensembl Gene ID	symbol	WT_TGFβ3	WT_BMP4	V620I_TGFβ3	V620I_BMP4	T89I_TGFβ3	T89I_BMP4
ENSG00000018625	ATP1A2	0.856603	0.926534	0.502541	-0.195366	-0.82274	-1.52258
ENSG00000080573	COL5A3	0.971644	0.217549	0.670768	-0.940252	0.272139	-1.36554
ENSG00000101542	CDH20	0.393847	0.615049	0.766113	-0.577283	0.0377661	-1.39195
ENSG00000108018	SORCS1	0.825232	0.677415	1.14449	-0.455507	-0.939454	-1.28807
ENSG00000111424	VDR	-0.087184	1.3648	-0.332595	-1.01548	0.873121	-1.18108
ENSG00000112297	CRYBG1	0.533275	1.68374	-0.649086	-0.825446	-0.207436	-0.929761
ENSG00000113389	NPR3	-0.563307	1.80693	-0.337101	-0.540559	0.166017	-0.821672
ENSG00000115461	IGFBP5	0.993488	0.518637	0.987265	-0.510236	-0.524181	-1.62421
ENSG00000121691	CAT	0.9857	1.55219	-0.727289	-0.724773	-0.726498	-0.721538
ENSG00000122254	HS3ST2	1.54484	0.6954	-0.108564	-0.426923	-0.867049	-1.15313
ENSG00000123560	PLP1	0.555704	0.300513	1.03239	-0.395338	-0.129688	-1.47398
ENSG00000124491	F13A1	0.994235	0.33118	-0.481237	-0.98442	0.776401	-1.00862
ENSG00000124593		1.0838	-0.195395	0.560717	-0.693685	0.407016	-1.36303
ENSG00000125804	FAM182A	1.49678	0.469502	0.614916	-0.65628	-0.951798	-1.09252
ENSG00000128045	RASL11B	-0.51424	1.10725	-0.102674	-0.416275	0.693433	-1.05755
ENSG00000129151	BBOX1	1.41604	0.149427	-0.185758	-0.696593	0.00922931	-0.985045
ENSG00000130720	FIBCD1	0.694259	0.265223	-0.0184182	-1.01831	1.03391	-1.28169
ENSG00000132773	TOE1	-0.713423	1.61161	-0.671271	-0.838076	0.294632	0.198283
ENSG00000133636	NTS	1.34745	0.672471	-0.480038	-0.443305	-0.470855	-0.994306
ENSG00000134363	FST	-0.365661	1.76708	-0.47475	-0.69593	0.266854	-0.821699
ENSG00000134569	LRP4	-0.381412	1.88319	-0.637149	-0.308898	0.0534777	-1.02467
ENSG00000136546	SCN7A	1.01435	0.191925	-0.217875	-0.63898	0.302147	-0.941384
ENSG00000138449	SLC40A1	0.862707	0.0174905	0.411092	-1.35351	0.983871	-1.09184
ENSG00000139155	SLCO1C1	0.624243	0.250059	1.10591	-0.187816	-0.38685	-1.50542
ENSG00000140945	CDH13	0.939102	0.741488	-0.632249	-1.26015	0.70324	-0.865986
ENSG00000141232	TOB1	-1.20344	1.67976	-0.0081337	-0.511117	-0.0129209	0.0717626
ENSG00000142700	DMRTA2	0.222284	0.122122	1.46154	-0.0723093	-0.461173	-1.20944
ENSG00000147119	CHST7	0.854575	0.993687	0.501854	-0.360945	-0.697322	-1.55518
ENSG00000150594	ADRA2A	0.267616	1.33748	-0.669342	-0.576311	0.427099	-1.27183
ENSG00000151468	CCDC3	-0.40045	1.84474	-0.251394	-0.616238	0.114698	-1.00561
ENSG00000152583	SPARCL1	0.569887	0.467815	1.19399	-0.376248	-0.460582	-1.46182
ENSG00000152661	GJA1	-1.03732	1.37144	0.257864	-0.848738	0.652724	-0.442004
ENSG00000153162	BMP6	-1.33904	1.27927	-0.0548355	-0.570153	0.743344	-0.0963878
ENSG00000153822	KCNJ16	0.863717	0.805607	-1.00547	-0.559963	0.51506	-1.16043
ENSG00000162745	OLFML2B	0.896935	0.503602	0.334403	-1.21311	0.681591	-1.49309
ENSG00000164920	OSR2	0.671981	0.376965	-0.633738	-1.09811	1.04895	-0.699297
ENSG00000164946	FREM1	0.849021	1.41863	-1.16532	-0.460784	-0.321997	-0.814499
ENSG00000165072	MAMDC2	-0.719424	1.55032	0.53512	-0.585552	-0.0500637	-0.795488
ENSG00000165553	NGB	0.956673	-0.032503	-0.0007223	-1.08127	1.0401	-1.17661
ENSG00000166292	TMEM100	-0.371284	1.3117	-0.758682	-0.892078	1.11709	-0.795228
ENSG00000168077	SCARA3	-0.723218	1.60536	-0.175033	-0.797849	0.192751	-0.194361
ENSG00000168405	CMAHP	-0.0080618	1.79572	-0.541188	-0.853977	0.088794	-0.822112
ENSG00000168546	GFRA2	0.29333	0.800239	-0.491026	-0.648513	1.06538	-1.52289
ENSG00000170290	SLN	0.583754	1.40632	-0.760649	-1.29133	0.0530686	-0.241757
ENSG00000170745	KCNS3	-0.26708	1.8997	-0.287425	-0.824543	-0.0615911	-0.707896
ENSG00000171502	COL24A1	-0.220904	1.22013	1.13885	-1.21151	-0.197197	-0.592874
ENSG00000171695	LKAAEAR1	0.0402243	1.09434	-0.324161	0.222417	0.00118307	-1.48672
ENSG00000173210	ABLIM3	1.14247	0.12158	-0.178309	-0.482566	0.472141	-1.49319
ENSG00000173918	C1QTNF1	-0.483054	1.24532	-0.265563	-0.984241	1.16461	-0.991284
ENSG00000175093	SPSB4	-0.0857203	0.883021	-0.367101	-0.985988	1.2804	-1.08851
ENSG00000178026	LRRC75B	0.590169	0.0615657	0.0977163	-0.668678	1.14127	-1.59681
ENSG00000180611	MB21D2	0.954269	0.0652116	0.312669	-0.852468	0.757496	-1.54535
ENSG00000181656	GPR88	0.530149	0.961183	0.158276	-0.274871	-0.338258	-1.32921
ENSG00000182040	USH1G	0.651296	0.326632	0.124619	0.665726	-0.596858	-1.52035
ENSG00000182103	FAM181B	0.0306843	0.222331	1.21012	0.0850318	-0.169544	-1.43479
ENSG00000183036	PCP4	1.1616	0.894412	0.312633	-0.825068	-0.64407	-1.09513
ENSG00000183067	IGSF5	1.27623	0.560457	0.490795	-0.45834	-0.808387	-1.25074
ENSG00000183876	ARSI	-0.845967	1.63023	-0.476639	-0.722316	0.627535	-0.442666
ENSG00000184254	ALDH1A3	0.54084	1.28181	-0.0270023	-0.738592	-0.147719	-1.22146
ENSG00000184492	FOXD4L1	1.33955	0.0692873	-0.354135	-0.91517	0.513881	-0.989269
ENSG00000184828	ZBTB7C	1.48468	0.815484	-0.292426	-0.611986	-0.621362	-1.13
ENSG00000185742	C11orf87	1.54928	0.524123	-0.068401	-0.533956	-0.675033	-1.08416
ENSG00000187135	VSTM2B	1.37532	0.989609	-0.524674	-0.567531	-0.610389	-1.05801
ENSG00000188338	SLC38A3	-0.126495	1.16603	-0.676921	-0.876471	1.06048	-0.954471
ENSG00000188580	NKAIN2	0.87417	0.621438	-0.469725	-0.666295	0.272426	-0.99926
ENSG00000197245	FAM110D	-0.741649	1.51046	0.00139277	-0.385449	0.166088	-0.733989
ENSG00000197847	SLC22A20P	0.398207	-0.0770491	-0.132496	-0.33844	0.683361	-0.755609
ENSG00000200795	RNU4-1	0.483227	0.504193	-0.666158	0.238628	0.51817	-1.65946
ENSG00000202538	RNU4-2	0.583179	0.00782756	-0.0980432	-0.103935	0.894519	-1.74408
ENSG00000213939	RPS12P29	0.283951	0.922323	0.0584944	-0.331622	0.0863599	-1.33984
ENSG00000219682		-0.714964	1.13553	0.895653	-0.971978	0.33879	-0.612159
ENSG00000228126	FALEC	0.946804	0.555495	0.06385	-0.166922	-0.106721	-1.70206
ENSG00000229980	TOB1-AS1	1.05455	0.63242	0.53111	-0.0851925	-0.878788	-1.49509
ENSG00000232044		1.21584	0.751954	-0.127091	-0.540136	-0.383391	-1.26526
ENSG00000236654		1.03833	0.167622	0.497694	-0.412848	-0.0201768	-1.52826
ENSG00000239268		1.47667	0.59589	0.125715	-0.754001	-0.588057	-1.09972
ENSG00000243319	FGF14-IT1	1.31866	0.561722	0.185994	-0.326861	-1.27304	-0.559977
ENSG00000248996		0.390051	0.329192	-0.228682	-0.918418	1.15079	-1.04014
ENSG00000256211		0.633663	0.257199	0.698308	-0.415874	0.0746706	-1.43119
ENSG00000260159		0.37458	-0.114715	0.27157	0.760865	-0.346486	-1.17056
ENSG00000271394		1.0958	0.732382	-0.0279237	-0.444727	-0.311678	-1.40112
ENSG00000272927		0.733344	0.145563	0.0847583	0.06449	0.0847583	-1.45563
ENSG00000273899	NOL12	0.99271	-0.230047	-0.0578585	-0.674686	0.875011	-1.22613
ENSG00000274618	H4C6	1.22558	0.957425	-0.752045	-0.973271	-0.0615531	-0.77886

## Sheet: Cluster 7
Ensembl Gene ID	symbol	WT_TGFβ3	WT_BMP4	V620I_TGFβ3	V620I_BMP4	T89I_TGFβ3	T89I_BMP4
ENSG00000003137	CYP26B1	-1.25194	-0.605862	-0.572218	0.994741	0.123734	1.55799
ENSG00000005513	SOX8	-1.04405	-0.349025	-0.616466	0.883959	-0.348605	1.76009
ENSG00000017427	IGF1	-0.79555	-0.171225	-1.07536	0.720669	0.0176471	1.37997
ENSG00000039537	C6	-0.668682	-0.262999	-0.8815	0.0562273	-0.0967352	2.17775
ENSG00000054654	SYNE2	-0.512531	-0.822094	0.72516	0.765277	-0.826175	1.13554
ENSG00000069188	SDK2	-1.18229	-0.330183	-0.628938	1.28566	-0.298089	1.32881
ENSG00000070031	SCT	-0.423229	-0.658952	-0.820029	0.731812	-0.529304	1.99293
ENSG00000076770	MBNL3	-0.45401	0.0697168	-0.889201	0.0697168	-0.468973	1.93393
ENSG00000079931	MOXD1	-0.537214	-0.693868	-0.176135	1.35482	-0.897518	1.20784
ENSG00000081052	COL4A4	-0.923005	-0.466633	-0.289972	0.917205	-0.275251	1.28688
ENSG00000081237	PTPRC	-1.07947	-0.370904	-0.671853	0.966221	0.200517	1.05003
ENSG00000083067	TRPM3	-1.07999	0.594884	-0.469778	1.33251	-0.649377	0.205732
ENSG00000088320	REM1	-1.21437	-0.371215	-0.72427	1.2245	0.0608134	1.12462
ENSG00000091482	SMPX	-0.783386	-0.644398	0.120035	0.206902	-0.296928	1.90371
ENSG00000091704	CPA1	-1.01085	-0.045262	-0.965589	0.497882	0.105611	1.56908
ENSG00000092607	TBX15	-1.12883	-0.364324	-0.540803	1.30615	0.204409	0.517593
ENSG00000101230	ISM1	-1.37806	-0.588689	-0.121065	0.90415	-0.0041587	1.54341
ENSG00000101425	BPI	-0.415324	-0.28186	-1.29482	0.785849	0.837181	0.0603542
ENSG00000102313	ITIH6	-1.06165	-0.393101	-0.885062	0.804964	-0.0065909	1.76023
ENSG00000103489	XYLT1	-1.17463	-0.163559	-0.992189	0.870163	0.0913386	1.49444
ENSG00000103888	CEMIP	-0.991643	0.228763	-0.514953	1.48461	-0.363078	0.0367491
ENSG00000104812	GYS1	-0.983058	0.295011	-1.2471	0.610623	-0.248689	1.68192
ENSG00000105370	LIM2	-0.608544	0.529822	-0.0312527	1.39576	-0.900433	-0.52422
ENSG00000106541	AGR2	-0.997091	-0.786006	-0.166822	0.649376	-0.135862	1.8596
ENSG00000107821	KAZALD1	-1.1762	0.11299	-0.692783	0.657303	-0.377517	1.73735
ENSG00000108001	EBF3	-1.23146	-0.299122	0.0770854	1.15729	-0.68449	1.33329
ENSG00000109705	NKX3-2	-1.1651	-0.408551	-0.386703	1.56762	-0.321623	0.823572
ENSG00000110195	FOLR1	-1.28788	0.0352785	-0.857736	0.692182	0.841797	0.482565
ENSG00000111679	PTPN6	-1.36809	0.434921	-0.814866	0.623061	-0.091423	1.35024
ENSG00000112761	CCN6	-1.32925	0.150218	-1.01085	0.701932	0.059638	1.56747
ENSG00000113396	SLC27A6	-0.841694	-0.149093	-0.83516	1.24264	-0.528063	1.20344
ENSG00000115363	EVA1A	-1.34172	-0.243805	-0.530217	1.60919	0.355056	0.0252484
ENSG00000115507	OTX1	-0.796503	0.670596	-0.164814	1.30386	-0.583308	-0.628053
ENSG00000116016	EPAS1	-0.764544	-0.778656	-0.730806	1.12737	-0.25215	1.62144
ENSG00000116035	VAX2	-0.0112251	0.215148	-1.31459	0.256307	-0.319916	1.1275
ENSG00000118271	TTR	-1.11423	-0.614291	0.170871	0.834656	1.02511	-0.345873
ENSG00000118640	VAMP8	-1.10657	0.342805	-0.930759	0.355264	-0.168005	1.69943
ENSG00000119715	ESRRB	0.336618	-0.268222	-0.671448	1.2365	-0.474752	-0.435413
ENSG00000120332	TNN	-0.955099	-0.7035	-0.605792	1.19937	-0.222287	1.51448
ENSG00000120949	TNFRSF8	-0.845706	-0.525458	-0.557194	1.67473	-0.546231	0.880747
ENSG00000122367	LDB3	-0.795586	0.333204	-0.977077	0.532403	-0.397189	1.4133
ENSG00000122862	SRGN	-0.930358	-0.631158	-0.470297	1.24126	-0.283699	1.27557
ENSG00000124232	RBPJL	-1.21077	0.589021	-0.544638	1.34617	-0.5405	0.2994
ENSG00000125637	PSD4	-1.17624	-0.156912	-0.918248	0.454561	0.210277	1.80933
ENSG00000126218	F10	-0.843777	0.21458	-0.564773	1.50265	-0.875398	0.567366
ENSG00000127951	FGL2	-0.830627	-0.28801	-0.641644	1.08678	-0.665166	1.571
ENSG00000131480	AOC2	-1.30565	-0.621649	-0.486319	1.24594	0.417397	0.838264
ENSG00000131771	PPP1R1B	-0.680722	-0.17641	-1.02241	0.839067	-0.505309	1.72024
ENSG00000134240	HMGCS2	-0.9719	-0.358488	-0.592168	1.37951	-0.190529	0.780706
ENSG00000135636	DYSF	-1.08278	-0.200928	-0.845648	1.19201	-0.395362	1.49507
ENSG00000138356	AOX1	-0.79798	-0.401814	-0.667143	1.71789	-0.623287	0.807393
ENSG00000138772	ANXA3	-0.786159	-0.519459	-0.308321	0.327314	-0.226089	1.91418
ENSG00000139597	N4BP2L1	-0.451713	0.256223	-0.309562	1.25652	-1.52087	0.922683
ENSG00000140459	CYP11A1	-1.17943	0.0553792	-0.539158	1.31763	-0.633369	1.12555
ENSG00000140522	RLBP1	-0.991589	-0.791757	-0.480908	0.831875	0.14079	1.56182
ENSG00000140807	NKD1	-0.965522	0.772002	-0.569782	1.12525	-0.889618	0.513636
ENSG00000141448	GATA6	-1.09756	-0.402573	0.218162	1.71357	-0.380298	0.00432003
ENSG00000142494	SLC47A1	-1.30728	0.026884	-0.834506	0.417012	0.123563	1.82094
ENSG00000142910	TINAGL1	-1.1889	-0.286525	-0.194109	1.23475	-0.626937	1.35092
ENSG00000144063	MALL	-0.668683	-0.614972	-0.645874	0.400394	-0.292704	2.21383
ENSG00000144668	ITGA9	-0.994193	-0.803143	-0.667816	0.851381	0.286937	1.54651
ENSG00000145700	ANKRD31	-0.330884	0.0617833	-0.366123	0.892425	-1.08601	0.98304
ENSG00000146530	VWDE	-0.590994	0.289847	-0.322598	1.20041	-1.32052	0.88428
ENSG00000147168	IL2RG	-0.466239	-0.120002	-1.18516	0.788868	-0.538371	1.63282
ENSG00000147408	CSGALNACT1	-1.16132	0.0300441	-0.617647	0.836457	-0.554222	1.7497
ENSG00000148677	ANKRD1	-0.852987	0.338905	-0.774894	0.0548425	-0.355145	1.86074
ENSG00000149596	JPH2	-0.464285	-0.0809761	-1.68601	0.645485	0.337013	1.10302
ENSG00000152669	CCNO	-1.00567	-0.253198	-0.0784151	1.67736	-0.403012	0.0577795
ENSG00000153064	BANK1	-1.065	-0.665766	-0.154249	0.38222	0.0578434	1.87518
ENSG00000154342	WNT3A	-1.07168	-0.565179	-0.01912	1.72422	-0.287326	0.285747
ENSG00000155011	DKK2	-0.928141	-0.873672	-0.595796	0.608857	1.08961	0.733586
ENSG00000158077	NLRP14	-0.42854	0.362852	-0.44001	0.913386	-1.21993	0.936325
ENSG00000159212	CLIC6	-0.958238	-0.848916	-0.471259	0.645812	1.00558	0.67894
ENSG00000159263	SIM2	-0.387305	-0.870234	-0.0006682	1.48046	-0.524025	0.40214
ENSG00000159712		-0.360878	-0.37438	-0.531906	0.584278	-0.779447	1.77247
ENSG00000161055	SCGB3A1	-1.45271	-0.308267	-0.409995	0.963335	0.514035	0.788136
ENSG00000162761	LMX1A	-0.959056	0.327828	-0.16536	1.37342	-0.396929	-0.294991
ENSG00000163132	MSX1	-1.39085	0.0254866	-0.820429	0.39929	0.945849	0.847397
ENSG00000163239	TDRD10	-0.508465	-0.48627	-0.641634	1.18944	-0.708219	1.32631
ENSG00000164007	CLDN19	-1.12803	-0.851537	-0.400412	0.972366	0.63281	0.899604
ENSG00000164287	CDC20B	-0.689571	0.00958723	-0.344549	1.49383	-0.607547	0.0694779
ENSG00000164309	CMYA5	-0.87497	0.018506	-0.767651	1.15728	-0.792351	1.42303
ENSG00000164707	SLC13A4	-1.06392	-0.612487	-0.537501	1.17505	0.613795	0.387576
ENSG00000165092	ALDH1A1	-0.756816	0.136658	-0.706056	0.597296	-0.712585	1.68665
ENSG00000165272	AQP3	-0.732545	-1.0528	-0.916035	0.984589	0.736137	1.00219
ENSG00000166509	CLEC3A	-0.86841	-0.681301	-0.934412	1.16784	0.0339768	1.39827
ENSG00000166831	RBPMS2	-1.0101	-0.67105	-0.486899	0.881331	-0.204648	1.82618
ENSG00000167105	TMEM92	-0.784592	-0.669853	-0.391372	1.59265	-0.128429	0.378334
ENSG00000167588	GPD1	-0.656615	-0.306499	-0.931809	0.925391	-0.176826	1.21787
ENSG00000167779	IGFBP6	-1.06725	-0.43208	-0.760528	0.921254	-0.123581	1.69606
ENSG00000168333	PPDPFL	-0.885099	0.0857361	-0.635456	0.820797	-0.788016	1.65756
ENSG00000169218	RSPO1	-0.569236	-0.0050599	-0.204082	1.45724	-0.437679	-0.38961
ENSG00000169247	SH3TC2	-0.736002	-0.425274	-0.583964	0.301657	-0.191516	1.98548
ENSG00000169291	SHE	-0.891807	-0.18467	-0.291491	1.03892	-0.867971	1.49887
ENSG00000169752	NRG4	-0.957605	0.173958	-0.715346	1.50791	-0.396423	0.278221
ENSG00000170323	FABP4	-0.736485	0.095008	-0.716143	-0.179614	-0.301668	2.21315
ENSG00000170477	KRT4	-0.829084	0.0829084	-0.902043	0.830742	-0.373088	1.28674
ENSG00000170498	KISS1	-0.356148	-0.328559	-0.742394	0.968121	-0.797572	1.42794
ENSG00000171219	CDC42BPG	-1.04335	-0.317653	-0.454528	1.56244	-0.309906	0.599151
ENSG00000171864	PRND	-0.975997	-0.194047	-0.668047	1.37891	0.627152	-0.446646
ENSG00000172005	MAL	-0.782096	-0.0906908	-0.66357	0.763689	-0.535166	1.52259
ENSG00000172116	CD8B	-0.884996	-0.618649	-0.276839	1.47217	-0.56538	1.07265
ENSG00000173083	HPSE	-0.812093	-0.448391	-0.122974	1.10851	-0.850378	1.45945
ENSG00000173253	DMRT2	-0.597432	-0.597432	-0.612334	1.32492	-0.642138	1.29511
ENSG00000173546	CSPG4	-1.11166	0.099162	-0.937441	1.22457	-0.425426	1.22192
ENSG00000174059	CD34	-0.992589	-0.104264	-0.820207	0.633923	-0.266915	1.79333
ENSG00000174950	CD164L2	-0.992063	0.0833908	-0.517598	1.50679	-0.106395	-0.138026
ENSG00000177398	UMODL1	-0.899676	-0.512123	-0.203004	1.22494	-0.698979	1.38412
ENSG00000179813	FAM216B	-0.980714	-0.241974	-0.114152	1.28626	0.141493	-0.159266
ENSG00000180875	GREM2	-0.945878	0.729286	-0.683013	1.08535	-0.63522	0.371631
ENSG00000180914	OXTR	-0.612245	-0.484124	-0.671044	0.856501	-0.42842	1.56209
ENSG00000183395	PMCH	-0.655612	-0.388864	-0.588925	0.297061	-0.379337	2.09126
ENSG00000183644	HOATZ	-0.845325	-0.420119	-0.39401	1.73948	-0.10681	-0.0956204
ENSG00000183963	SMTN	-1.14398	0.0323182	-0.767803	1.34882	-0.409718	0.997879
ENSG00000184058	TBX1	-1.53282	-0.675811	0.0778473	0.947559	0.60558	0.796141
ENSG00000185652	NTF3	-1.31338	-0.260303	-0.175653	1.39153	-0.397762	0.948868
ENSG00000186047	DLEU7	-0.262354	-0.262354	-0.705999	0.870918	-0.776279	1.27942
ENSG00000187123	LYPD6	-0.843994	-0.0322597	-0.428516	0.708504	-0.586723	1.43448
ENSG00000188687	SLC4A5	-0.667326	-0.113094	-0.253978	1.54562	-0.55967	-0.0200572
ENSG00000188820	CALHM6	-0.309467	-0.237801	-1.33668	0.908855	0.299694	0.454971
ENSG00000189001	SBSN	-1.17661	-0.414439	0.0440436	1.69482	0.0605867	-0.263187
ENSG00000189129	PLAC9	-1.15229	-0.0186822	-0.859226	0.472685	0.126791	1.62122
ENSG00000189223	PAX8-AS1	-0.837742	-0.520454	-0.552642	0.941833	-0.423888	1.67298
ENSG00000196542	SPTSSB	-0.563276	-0.271771	-0.639771	1.60131	-0.941613	0.873576
ENSG00000196917	HCAR1	-1.14778	-0.0840565	-0.877758	0.599181	0.0264071	1.68609
ENSG00000196932	TMEM26	-1.23902	-0.903025	0.389719	0.705458	-0.0713798	1.6209
ENSG00000197991		-0.0779673	-0.278668	-0.848601	0.546071	-0.972897	1.89322
ENSG00000198157	HMGN5	-1.07761	0.57825	0.453529	0.562328	-0.647727	0.326155
ENSG00000198203	SULT1C2	-0.942711	0.0966332	-0.597137	1.42993	-0.866597	0.974126
ENSG00000198695	ND6	-0.743296	-0.613585	0.51803	0.958599	-0.658313	0.890762
ENSG00000198743	SLC5A3	-0.629101	0.496457	0.291367	0.9335	-1.37793	0.478066
ENSG00000204252	HLA-DOA	-1.2143	-0.550612	-0.232699	1.37653	-0.0245809	0.783311
ENSG00000205414		-0.704492	-0.3816	0.144595	1.32255	-0.865938	0.694707
ENSG00000205592	MUC19	-0.773479	-0.561084	0.230188	1.43792	-0.661035	0.513381
ENSG00000205835	GMNC	-0.897508	-0.713546	-0.367427	1.24462	-0.247511	1.18602
ENSG00000206384	COL6A6	-0.527352	-0.474011	-0.273981	0.52614	-0.687376	1.82411
ENSG00000211459		-0.362364	0.0316556	0.938993	0.450255	-1.20068	0.502518
ENSG00000212993	POU5F1B	-0.81109	-0.48146	-0.312982	1.65015	-0.327632	0.273027
ENSG00000221869	CEBPD	-1.04714	-0.0286925	-0.359656	0.715801	-0.623517	1.67106
ENSG00000224594		-1.05226	-0.291326	-0.769744	0.568591	0.0489292	1.73783
ENSG00000225614	ZNF469	-1.15476	-0.381599	-0.5595	0.785045	-0.0511073	1.62939
ENSG00000225950	NTF4	-1.26609	-0.223047	0.0100569	1.21706	-0.347501	0.816044
ENSG00000226051	ZNF503-AS1	-0.519018	-0.721313	-0.968561	1.14429	-0.249292	1.429
ENSG00000227432		-0.531123	-0.42572	-0.621469	1.00475	-0.651584	1.42637
ENSG00000228639		-0.422431	-0.631609	-0.666472	0.653342	-0.273018	1.56476
ENSG00000228983	SLC47A1P1	-1.09704	-0.188149	-0.768524	1.38872	-0.396208	1.15876
ENSG00000230121		-0.843298	-0.464674	-0.71709	0.623868	-0.204371	1.90172
ENSG00000231609	LOC100132215	-0.607462	0.564922	-0.449803	1.33477	-0.612494	-0.456512
ENSG00000231625		-1.09631	-0.371133	-0.227889	0.86435	-0.236842	1.3478
ENSG00000232504		-0.795814	0.600291	-0.519109	-0.0411628	-0.682616	1.74485
ENSG00000232591		-0.601362	0.397126	-0.859305	0.521937	-0.626324	1.2708
ENSG00000233608	TWIST2	-1.53725	-0.0683299	-0.250196	1.39296	0.011793	0.517966
ENSG00000234257	SOD2P1	-0.855149	-0.044539	-0.507745	0.236057	-0.400851	1.92705
ENSG00000234602	MCIDAS	-0.777858	0.242834	-0.662034	1.43726	-0.560689	0.206639
ENSG00000235121		-0.419099	-0.255427	-0.991951	1.02667	-0.473656	1.15397
ENSG00000237181		-0.961464	-0.321053	-0.615352	0.953551	-0.43297	1.63127
ENSG00000237988		-0.490212	-0.357769	-0.635269	1.49644	-0.641576	0.626096
ENSG00000238018		-1.01423	0.215318	-0.289444	0.784792	-0.716549	1.26367
ENSG00000242193	CRYZL2P	-1.42694	-0.0890637	-0.464791	0.543002	0.606208	0.953844
ENSG00000242516	LINC00960	-0.979187	-0.346064	-0.627452	0.709142	-0.365974	1.9369
ENSG00000245904		-0.832326	-0.0372356	-0.438796	0.781949	-0.603437	1.3602
ENSG00000248771	SMIM31	-0.800567	-0.355417	-0.974756	0.467144	0.0607023	1.81227
ENSG00000251348		-0.788432	0.386057	-0.561057	0.493761	-0.829462	1.54516
ENSG00000251441	RTEL1P1	-0.898193	-0.219804	0.21506	0.736898	-0.672063	1.18916
ENSG00000253073	RN7SKP295	-0.518501	0.129926	-0.690533	-0.002406	-0.452335	1.81495
ENSG00000253293	HOXA10	-1.14638	-0.426621	-0.244282	0.753784	0.120396	1.17604
ENSG00000253438	PCAT1	-0.925297	-0.334594	-0.334594	1.1876	-0.334594	0.877105
ENSG00000253608	LOC101929268	-0.828861	-0.365261	-1.05698	0.561939	0.186644	1.65103
ENSG00000253809		-1.29981	-0.0555964	-0.400039	0.197463	0.197463	1.68067
ENSG00000253944		-0.960638	0.578068	-0.565147	0.188757	-0.589865	1.61005
ENSG00000254126	CD8B2	-0.740162	-0.854432	-0.283079	1.35956	-0.425918	1.16435
ENSG00000256417		-0.864587	-0.833405	0.857343	1.42208	-0.771041	0.538595
ENSG00000256433		-0.838202	-0.0058208	-0.610542	1.25342	-0.0911932	0.186267
ENSG00000256673		-0.795193	-0.464298	-0.565005	1.66493	-0.680099	0.931212
ENSG00000259236		-0.862144	0.25497	-0.806684	0.326275	-0.386776	1.69692
ENSG00000259318		-0.936961	-0.144148	-0.291648	0.61179	-0.549773	1.65044
ENSG00000260139	CSPG4P13	-1.13334	0.061768	-1.04805	1.06993	-0.104282	1.18929
ENSG00000260417		-0.0180227	0.00400504	-0.906474	0.752948	-0.987243	1.23756
ENSG00000261448	LOC102723692	-0.620736	-0.738462	-0.990731	0.842428	0.0856188	1.5656
ENSG00000261730		-0.49779	-0.616254	-1.25245	0.739505	0.871132	0.590328
ENSG00000261760	LOC100507334	-0.773834	-0.258345	-0.500669	0.0324434	-0.23191	2.14286
ENSG00000264985	LOC101928251	-0.753468	-0.857721	-0.527585	1.36635	-0.180074	1.09413
ENSG00000266709	MGC12916	-0.744592	0.095787	-0.737165	0.356814	-0.696843	2.05561
ENSG00000267366		-0.76498	-0.779821	-0.710563	0.92688	-0.0971403	1.66398
ENSG00000267503		-0.805079	-0.355367	-0.897328	0.8381	0.146235	1.13214
ENSG00000269473		0.226598	-0.28658	-1.49621	0.171615	0.0433202	1.28961
ENSG00000269821	KCNQ1OT1	-0.643398	-0.647919	-0.140644	1.10245	-0.79247	1.4491
ENSG00000270933		-0.86486	-0.745176	-0.53457	0.30971	0.126009	2.10033
ENSG00000271086	NAMA	-0.590606	0.35094	-0.119833	1.23599	-1.15553	0.332109
ENSG00000272221		-1.22503	0.223458	-0.522732	0.223458	-0.0618499	1.64268
ENSG00000273055		0.0327413	-0.0032741	-0.591526	0.284849	-0.90366	1.37732
ENSG00000273142		-0.549981	-0.287707	-0.328505	1.05863	-0.689861	0.953725
ENSG00000274995		-0.736682	-0.231341	-0.682539	0.851532	-0.610347	1.65166
ENSG00000275927		-0.866497	-0.761499	-0.675945	0.883466	-0.0148482	1.68845
ENSG00000277152		-0.944574	-0.330093	-0.561521	0.6435	-0.369995	1.8964
ENSG00000277639	LOC105371267	-1.08886	-0.651636	-0.412002	1.32009	-0.184981	1.21919

## Sheet: Cluster 8
Ensembl Gene ID	symbol	WT_TGFβ3	WT_BMP4	V620I_TGFβ3	V620I_BMP4	T89I_TGFβ3	T89I_BMP4
ENSG00000109193	SULT1E1	-0.221112	0.923468	-1.0657	-0.74725	-0.308802	1.5373
ENSG00000129159	KCNC1	1.14172	-0.402278	-0.237208	-0.0078783	-1.37148	1.09043
ENSG00000129824	RPS4Y1	0.350033	0.821498	-1.37696	-1.38325	0.607885	0.848737
ENSG00000154080	CHST9	0.796747	-0.355807	-0.603927	-0.896067	-0.415836	1.76521
ENSG00000162645	GBP2	1.23598	-0.451568	0.0449123	-0.539614	-1.06055	1.04276
ENSG00000164093	PITX2	-0.126055	1.24124	-1.06654	-1.0719	0.11845	0.850892
ENSG00000175084	DES	1.28288	-0.244378	-1.1495	-1.08435	0.304562	0.80455
ENSG00000268089	GABRQ	1.05786	0.0056823	-0.579437	-0.45269	-1.18452	1.34434

## Sheet: Cluster 9
Ensembl Gene ID	symbol	WT_TGFβ3	WT_BMP4	V620I_TGFβ3	V620I_BMP4	T89I_TGFβ3	T89I_BMP4
ENSG00000003249	DBNDD1	1.54817	0.185124	0.15414	-0.501475	-0.381184	-1.28832
ENSG00000006047	YBX2	1.43504	-0.0191171	0.769132	-0.495241	-0.467467	-1.37342
ENSG00000006432	MAP3K9	1.79434	0.0115993	-0.0807486	-0.227319	-0.892733	-0.833766
ENSG00000009950	MLXIPL	1.28227	-0.200897	0.555579	0.496014	-1.18968	-1.07253
ENSG00000011083	SLC6A7	1.53152	-0.24126	0.190434	-0.315568	-0.35803	-1.01265
ENSG00000028277	POU2F2	1.5817	-0.389445	0.350263	0.146991	-0.762673	-1.11903
ENSG00000039068	CDH1	1.75491	-0.599905	0.321941	-0.575947	-0.291863	-0.704868
ENSG00000041515	MYO16	1.72985	-0.0676956	0.160854	-0.570234	-0.493938	-0.958159
ENSG00000055163	CYFIP2	1.4949	-0.0369265	0.313586	-0.329569	-0.349517	-1.3521
ENSG00000056487	PHF21B	1.68435	-0.135476	0.493891	-0.245537	-0.924147	-0.999483
ENSG00000059804	SLC2A3	1.11421	-1.14992	0.903224	0.42195	-0.939806	-0.165147
ENSG00000065320	NTN1	1.87389	-0.295812	0.14791	-0.511659	-0.368825	-1.07804
ENSG00000065717	TLE2	1.77201	0.0651934	0.0461588	-0.673304	-0.370268	-1.10433
ENSG00000067842	ATP2B3	1.76315	0.072009	-0.109125	-0.245079	-0.604446	-1.20505
ENSG00000070495	JMJD6	1.84187	-0.297952	0.420967	-0.434176	-0.804312	-0.828203
ENSG00000070886	EPHA8	1.71585	0.218806	-0.283833	-0.241544	-0.839637	-0.854136
ENSG00000072315	TRPC5	1.89577	-0.264564	-0.0562671	-0.24671	-0.871599	-0.627595
ENSG00000074317	SNCB	1.82538	-0.021223	0.0726085	-0.304219	-0.887475	-0.889226
ENSG00000074660	SCARF1	0.98125	-0.598373	1.66596	-0.256191	-0.604576	-1.02877
ENSG00000076344	RGS11	1.43359	0.367446	0.0726966	-0.36209	-0.570529	-1.23059
ENSG00000077522	ACTN2	1.41876	-0.569167	0.478114	0.17345	-1.12899	-0.336861
ENSG00000081479	LRP2	1.68751	-0.314563	0.734393	-0.596553	-0.568631	-1.0114
ENSG00000082684	SEMA5B	1.8442	0.00455644	0.162213	-0.536889	-0.671721	-1.01574
ENSG00000085563	ABCB1	1.87554	-0.0170571	-0.661519	-0.457575	-0.343367	-0.748535
ENSG00000086506	HBQ1	1.56551	-0.0761275	0.164315	-0.0097986	-0.896948	-0.941168
ENSG00000087250	MT3	1.97175	-0.280474	-0.0235548	-0.537029	-0.580697	-0.741181
ENSG00000088827	SIGLEC1	1.85677	-0.332416	0.0985469	-0.372075	-0.633825	-0.789817
ENSG00000099958	DERL3	1.73318	-0.270799	0.0171152	0.0588648	-0.950215	-0.77849
ENSG00000100060	MFNG	1.91599	-0.296181	0.141847	-0.579992	-0.626646	-0.692739
ENSG00000100078	PLA2G3	1.9332	-0.233456	0.105901	-0.4635	-0.664177	-0.868662
ENSG00000100346	CACNA1I	1.52325	-0.470817	0.525699	-0.10591	-0.328163	-1.35018
ENSG00000101187	SLCO4A1	1.19581	-0.583685	0.108276	0.310179	-1.09648	0.123958
ENSG00000101197	BIRC7	1.45781	-0.881522	0.514419	0.0779698	-0.489893	-0.733573
ENSG00000101203	COL20A1	1.72354	-0.131756	-0.134666	-0.0182554	-0.830222	-0.856415
ENSG00000101327	PDYN	1.87077	0.176418	-0.493899	-0.603338	-0.638515	-0.579887
ENSG00000101670	LIPG	1.88008	0.0267404	0.143572	-0.554223	-0.749193	-0.948106
ENSG00000102195	GPR50	1.87407	-0.588054	0.422879	-0.585113	-0.523339	-0.659634
ENSG00000102878	HSF4	1.69083	-0.559679	0.32433	0.0202258	-0.502413	-1.18961
ENSG00000102981	PARD6A	1.78149	-0.109433	0.0644255	-0.233618	-0.680683	-1.07476
ENSG00000103184	SEC14L5	1.83419	0.054309	0.0070919	-0.450709	-0.777123	-0.887981
ENSG00000103460	TOX3	1.73666	-0.180123	0.363942	-0.379813	-0.714623	-0.980079
ENSG00000103740	ACSBG1	1.77003	-0.0730564	0.0919381	-0.244845	-0.841737	-0.905794
ENSG00000104059	FAM189A1	1.47681	-0.380292	0.401395	-0.0865669	-0.337654	-1.29779
ENSG00000104953	TLE6	1.63036	0.526703	-0.237837	-0.578789	-0.523698	-1.16826
ENSG00000105088	OLFM2	1.50217	0.110843	0.598336	-0.427965	-0.607784	-1.36802
ENSG00000105122	RASAL3	1.52345	0.170514	-0.154053	-0.254839	-0.762189	-0.748523
ENSG00000105374	NKG7	1.79356	-0.368252	0.415317	-0.431217	-0.620113	-0.913952
ENSG00000105509	HAS1	1.92861	0.150419	-0.595642	-0.580767	-0.488081	-0.751262
ENSG00000105696	TMEM59L	1.64096	0.35273	0.221255	-0.47974	-0.744338	-1.24741
ENSG00000106003	LFNG	1.62895	-0.0009965	0.0453808	-0.471515	-0.297811	-1.19022
ENSG00000106018	VIPR2	1.85922	-0.0309171	0.219165	-0.629063	-0.661533	-0.93611
ENSG00000106113	CRHR2	1.47778	-0.311435	0.276489	0.0277517	-0.71846	-0.910666
ENSG00000106236	NPTX2	1.82779	0.299482	-0.236943	-0.512885	-0.799455	-0.849632
ENSG00000106278	PTPRZ1	1.50067	-0.183034	0.885003	-0.424965	-0.806545	-0.999838
ENSG00000106633	GCK	1.80262	-0.385585	0.136893	-0.464018	-0.174608	-1.17477
ENSG00000106689	LHX2	1.53278	-0.0678659	0.756678	-0.752102	-0.407625	-1.16359
ENSG00000107518	ATRNL1	1.68507	-0.355992	0.704662	-0.412726	-0.669609	-1.03366
ENSG00000107831	FGF8	1.87124	-0.184601	0.298878	-0.537751	-0.701714	-0.895105
ENSG00000108830	RND2	1.4906	0.337556	0.253691	-0.300971	-0.751695	-1.28768
ENSG00000108947	EFNB3	1.71831	-0.251862	0.432022	-0.357934	-0.642023	-1.05401
ENSG00000110148	CCKBR	1.56541	-0.393787	0.539892	-0.102969	-0.776442	-0.929504
ENSG00000110786	PTPN5	1.59795	0.426066	0.00359674	-0.450714	-0.736877	-1.11883
ENSG00000111012	CYP27B1	1.15625	-0.870056	0.104534	0.3289	-0.617644	-0.101135
ENSG00000111674	ENO2	1.84837	-0.348399	0.436271	-0.405527	-0.634587	-1.04942
ENSG00000111913	RIPOR2	1.8856	-0.0430779	-0.117897	-0.479986	-0.70075	-0.764485
ENSG00000112212	TSPO2	1.73129	-0.943619	-0.216742	-0.100441	-0.507493	-0.0229077
ENSG00000112232	KHDRBS2	1.52105	0.0890049	0.532258	-0.382256	-0.70739	-1.22614
ENSG00000112379	ARFGEF3	1.76368	-0.269732	0.337068	-0.155526	-1.01173	-0.772667
ENSG00000114631	PODXL2	1.52783	0.247448	0.260306	-0.271021	-0.784203	-1.22038
ENSG00000114654	EFCC1	1.52057	-0.448471	0.736521	-0.363888	-0.457178	-1.07124
ENSG00000115009	CCL20	1.5548	-1.00144	0.0868571	-0.302274	-0.191546	-0.166236
ENSG00000115155	OTOF	1.936	-0.0992158	-0.356358	-0.394278	-0.655568	-0.692895
ENSG00000115194	SLC30A3	1.76105	-0.108664	0.136245	-0.223807	-0.832423	-0.931118
ENSG00000116014	KISS1R	1.761	-0.146847	0.0193466	-0.323005	-0.662509	-0.857529
ENSG00000116299	ELAPOR1	1.64796	0.118232	0.471271	-0.496678	-0.657007	-1.28795
ENSG00000116981	NT5C1A	1.7678	-0.165066	0.264461	-0.340782	-0.765427	-0.9265
ENSG00000117707	PROX1	1.67781	-0.0728276	0.3732	-0.347866	-0.817177	-0.959789
ENSG00000118473	SGIP1	1.59038	-0.101969	0.512116	-0.276201	-0.754844	-1.12194
ENSG00000118946	PCDH17	1.75593	0.0523749	-0.0321233	-0.394697	-0.674428	-0.953449
ENSG00000120088	CRHR1	1.78329	0.0703611	-0.0177925	-0.162558	-0.936531	-0.988291
ENSG00000120738	EGR1	1.36124	-0.68288	1.38376	-0.58841	-0.545802	-0.775953
ENSG00000120875	DUSP4	1.70423	-0.174094	0.190248	-0.0370927	-0.946555	-0.918897
ENSG00000120937	NPPB	1.7331	-0.40748	-0.436213	-0.235085	-0.666073	-0.129732
ENSG00000121053	EPX	1.7306	-0.0890324	0.29537	-0.262883	-0.853973	-0.994985
ENSG00000121653	MAPK8IP1	1.71	-0.000971	0.156356	-0.506151	-0.486232	-1.11189
ENSG00000121904	CSMD2	1.86359	-0.13713	0.0885301	-0.697922	-0.401072	-0.925149
ENSG00000121966	CXCR4	1.6616	0.570384	-0.137552	-0.572433	-0.715724	-1.12088
ENSG00000124493	GRM4	1.74372	-0.159063	-0.0611634	-0.0653293	-0.796449	-0.90268
ENSG00000124602	UNC5CL	1.63262	-0.787186	0.718194	-0.525922	-0.115363	-0.990391
ENSG00000125285	SOX21	1.65354	-0.337568	0.719092	-0.615895	-0.540961	-0.931243
ENSG00000125355	TMEM255A	1.46604	0.164467	0.375532	-0.70241	-0.355659	-1.13878
ENSG00000125810	CD93	1.20118	-0.608517	0.0383214	-0.0198214	-0.75024	0.198214
ENSG00000125878	TCF15	1.32485	-0.560995	0.113695	0.554712	-0.995429	-0.544539
ENSG00000127329	PTPRB	1.9216	0.00830095	-0.377076	-0.522704	-0.64492	-0.639301
ENSG00000127366	TAS2R5	1.19813	-1.16978	0.331823	0.493534	-0.684648	-0.114808
ENSG00000128917	DLL4	0.956654	-0.91441	0.667427	0.477579	-0.848615	-0.229039
ENSG00000129451	KLK10	1.09392	-0.390165	-0.39685	1.25436	-1.02692	-0.844749
ENSG00000129993	CBFA2T3	1.41205	-0.743393	0.825905	0.326779	-0.661404	-1.27129
ENSG00000130675	MNX1	1.55402	-0.531991	0.311027	-0.236627	-0.587371	-0.575064
ENSG00000131773	KHDRBS3	1.64779	0.271713	0.0722471	-0.671884	-0.438344	-1.15128
ENSG00000132003	ZSWIM4	1.65412	-0.611185	0.260657	-0.364208	0.0902698	-1.28598
ENSG00000132016	BRME1	1.31549	-0.110769	-0.0299583	-0.123363	-0.0572451	-1.33553
ENSG00000132182	NUP210	1.82011	0.0358004	0.0943794	-0.431121	-0.781312	-0.952345
ENSG00000132259	CNGA4	1.63802	-0.283924	-0.0208003	0.230884	-0.747251	-1.09618
ENSG00000132702	HAPLN2	1.72288	0.0585477	0.181564	-0.335827	-0.86769	-0.952113
ENSG00000133083	DCLK1	1.48633	0.339969	0.205911	-0.369509	-0.694663	-1.22208
ENSG00000133124	IRS4	1.34801	-0.232267	1.0084	-0.465681	-0.59816	-1.0776
ENSG00000134007	ADAM20	1.45492	-0.403431	0.510878	0.235842	-1.16164	-0.678467
ENSG00000134376	CRB1	1.7423	-0.0955513	0.297841	-0.4143	-0.672527	-1.0444
ENSG00000134594	RAB33A	1.66664	-0.0681709	0.402566	-0.174753	-0.955085	-1.02741
ENSG00000135245	HILPDA	1.51214	-1.08753	0.854769	-0.492444	-0.543824	-0.0392263
ENSG00000135423	GLS2	1.68331	-0.2622	0.431724	-0.23192	-0.867806	-0.860236
ENSG00000135424	ITGA7	1.40419	0.141197	0.730221	-0.456818	-0.538661	-1.46343
ENSG00000135472	FAIM2	1.74671	-3.92e-05	0.203828	-0.407917	-0.650917	-1.12095
ENSG00000136842	TMOD1	1.78314	0.273503	-0.414161	-0.553843	-0.655918	-0.715014
ENSG00000136928	GABBR2	1.46604	0.0446645	0.399762	-0.365744	-0.457865	-1.31588
ENSG00000137261	KIAA0319	1.62261	-0.130206	0.436154	-0.361815	-0.671244	-1.04861
ENSG00000138079	SLC3A1	1.24009	-0.554047	0.768436	0.324525	-0.914724	-0.896228
ENSG00000138653	NDST4	1.72219	-0.192305	0.132008	-0.26763	-0.669359	-0.922532
ENSG00000138944	SHISAL1	1.56351	0.31664	0.112982	-0.63599	-0.48007	-1.13177
ENSG00000139318	DUSP6	1.68816	-0.691468	0.319384	-0.145298	-0.411421	-0.906017
ENSG00000139352	ASCL1	1.86013	0.0252607	0.0532046	-0.717919	-0.614307	-0.790761
ENSG00000139445	FOXN4	1.64758	-0.242647	-0.378794	-0.0811702	-0.385127	-0.872724
ENSG00000139714	MORN3	1.70104	-0.421687	0.252536	0.0428834	-0.80049	-0.9482
ENSG00000139767	SRRM4	1.72544	-0.0047819	-0.0051549	-0.0719314	-0.907944	-0.982554
ENSG00000139910	NOVA1	1.52607	-0.383622	0.201634	-0.0666446	-0.550589	-0.901916
ENSG00000139915	MDGA2	1.79722	0.134185	-0.30457	-0.749982	-0.394137	-0.745141
ENSG00000140009	ESR2	1.77044	-0.0867259	-0.220321	-0.13753	-0.82056	-0.747177
ENSG00000140015	KCNH5	1.28446	0.288514	0.251352	-0.172297	-0.670271	-1.22523
ENSG00000140067	FAM181A	1.4579	-0.0672231	0.627727	-0.642354	-0.236681	-1.30992
ENSG00000140379	BCL2A1	0.910475	-1.0093	0.363068	-0.454186	0.239709	0.0546705
ENSG00000140519	RHCG	1.45554	-0.173198	0.755733	-0.0312436	-0.920328	-1.19677
ENSG00000140968	IRF8	0.756628	-0.713886	1.09008	0.216439	-0.0136411	-1.41747
ENSG00000141506	PIK3R5	1.37752	-0.585084	-0.0664381	0.528826	-0.938706	-0.443635
ENSG00000142149	HUNK	1.51243	0.300678	0.248311	-0.545561	-0.505763	-1.26403
ENSG00000142513	ACP4	1.42012	-0.606046	0.496773	-0.173892	-0.499779	-0.683976
ENSG00000143126	CELSR2	1.59074	-0.0453589	0.498897	-0.286144	-0.716534	-1.2225
ENSG00000143333	RGS16	1.35738	-0.455852	1.29269	-0.451357	-0.605796	-1.08518
ENSG00000144119	C1QL2	1.93117	-0.322863	-0.110678	-0.472436	-0.632444	-0.560556
ENSG00000144191	CNGA3	1.81342	0.0937007	-0.248001	-0.416052	-0.704538	-0.8007
ENSG00000144285	SCN1A	1.82393	-0.0276277	0.0604366	-0.439636	-0.685628	-0.955153
ENSG00000144485	HES6	1.77117	-0.687723	-0.109261	-0.434105	-0.277475	-0.386563
ENSG00000145087	STXBP5L	1.60803	0.0226937	0.334421	-0.290276	-0.828658	-1.01681
ENSG00000145248	SLC10A4	1.41638	-0.344733	-0.210304	-0.594248	0.389308	-0.945311
ENSG00000146360	GPR6	1.96269	-0.212643	0.00307151	-0.524519	-0.653167	-0.766222
ENSG00000146555	SDK1	1.58082	-0.531512	0.876958	-0.504793	-0.326413	-1.16776
ENSG00000147488	ST18	1.88616	-0.0770069	-0.101991	-0.528781	-0.636591	-0.756379
ENSG00000148204	CRB2	1.55164	-0.34407	0.742196	-0.394449	-0.353258	-1.35535
ENSG00000148357	HMCN2	1.61362	-0.0159881	0.18247	-0.761414	-0.090208	-1.17715
ENSG00000148600	CDHR1	1.76877	0.0728201	-0.499069	-0.234254	-1.17989	-0.0708566
ENSG00000148826	NKX6-2	1.71391	-0.27541	0.590443	-0.569449	-0.605228	-0.942202
ENSG00000148926	ADM	1.18452	-0.972757	1.33945	0.0353062	-0.958721	-0.390579
ENSG00000148948	LRRC4C	1.42076	0.34095	0.234302	-0.506309	-0.36263	-1.42467
ENSG00000149527	PLCH2	1.73168	0.0866784	0.111565	-0.383729	-0.719909	-1.06452
ENSG00000149926	TLCD3B	1.72593	0.016812	0.330194	-0.339291	-0.841619	-1.07931
ENSG00000151025	GPR158	1.35262	0.171257	0.787239	-0.616776	-0.556052	-1.2553
ENSG00000152092	ASTN1	1.46535	-0.0460105	0.79505	-0.460515	-0.699195	-1.14122
ENSG00000152128	TMEM163	1.67701	-0.304346	0.101794	-0.38975	-0.372669	-0.915454
ENSG00000152977	ZIC1	1.55182	-0.252781	0.68358	-0.359534	-0.623289	-1.1052
ENSG00000153266	FEZF2	1.62922	-0.561062	0.84548	-0.80726	-0.233595	-0.881889
ENSG00000153820	SPHKAP	1.82007	0.135675	-0.0997301	-0.527115	-0.778518	-0.767091
ENSG00000154553	PDLIM3	1.83934	-0.200269	0.0579956	-0.247971	-0.820392	-0.818947
ENSG00000154764	WNT7A	1.65224	-0.150076	0.714305	-0.455432	-0.840705	-0.98901
ENSG00000155265	GOLGA7B	1.71938	0.162003	-0.0516506	-0.490546	-0.472717	-1.17251
ENSG00000155511	GRIA1	1.49651	-0.222196	0.807823	-0.39746	-0.632382	-1.13378
ENSG00000157087	ATP2B2	1.48547	0.352814	-0.246107	-0.187921	-0.518662	-1.26283
ENSG00000157219	HTR5A	1.87539	0.205429	-0.23741	-0.626447	-0.763023	-0.684388
ENSG00000157851	DPYSL5	1.63143	0.148813	0.134397	-0.266081	-0.743142	-1.16243
ENSG00000158164	TMSB15A	1.2677	-0.00139	0.869133	-0.105363	-0.869874	-1.25723
ENSG00000158816	VWA5B1	1.77213	-0.0524375	-0.477035	-0.320815	-0.370886	-0.893622
ENSG00000159167	STC1	1.64799	-1.07419	0.397516	0.101876	-0.701147	-0.363558
ENSG00000160223	ICOSLG	1.07214	-0.975107	0.53554	0.0572657	-0.135211	-0.560991
ENSG00000160471	COX6B2	1.02944	-0.843248	1.21516	-0.0797286	-0.0436163	-1.29895
ENSG00000161270	NPHS1	1.67014	-0.0670214	0.12788	-0.456824	-0.600881	-0.855101
ENSG00000161681	SHANK1	1.83813	0.231614	-0.464857	-0.482785	-0.599708	-0.851482
ENSG00000162188	GNG3	1.80373	-0.125863	0.155049	-0.232877	-0.761259	-1.0667
ENSG00000162692	VCAM1	1.69567	-0.508664	0.692498	-0.442006	-0.62152	-0.857132
ENSG00000162723	SLAMF9	1.65379	-0.882386	-0.0768172	-0.278361	-0.169806	-0.354168
ENSG00000162873	KLHDC8A	1.17763	0.1836	0.365289	-0.279632	-0.278881	-1.43559
ENSG00000162951	LRRTM1	1.55998	0.538609	-0.229542	-0.568183	-0.58454	-1.03162
ENSG00000162975	KCNF1	1.77693	0.124243	0.115538	-0.366963	-0.874335	-0.995375
ENSG00000163273	NPPC	1.45392	-0.180052	0.958778	-0.390488	-0.786603	-1.08781
ENSG00000163395	IGFN1	1.80927	-0.182788	-0.542723	0.146118	-0.815778	-0.733034
ENSG00000163545	NUAK2	1.70266	-0.428566	0.67404	-0.389281	-0.717313	-0.89737
ENSG00000163958	ZDHHC19	1.81659	-0.187672	-0.314608	-0.0874586	-0.648651	-0.875801
ENSG00000164100	NDST3	1.78218	0.0992071	-0.224397	-0.602329	-0.52438	-0.781846
ENSG00000164199	ADGRV1	1.67563	-0.121896	0.566218	-0.450774	-0.742533	-1.04678
ENSG00000164512	ANKRD55	1.46305	0.309555	-0.0503342	-0.484047	-0.47482	-1.03465
ENSG00000165076	PRSS37	1.27376	-0.944907	0.665503	0.365393	-0.832365	-0.481345
ENSG00000165186	PTCHD1	1.36608	0.790149	0.120937	-0.745657	-0.561793	-1.25264
ENSG00000165215	CLDN3	1.75792	-0.0506431	-0.0336685	-0.212673	-0.745056	-0.965726
ENSG00000165731	RET	1.72536	-0.134411	0.320411	-0.292824	-0.732157	-1.07503
ENSG00000165810	BTNL9	1.84285	0.00253487	-0.480781	-0.589992	-0.42269	-0.629493
ENSG00000165973	NELL1	1.5373	0.265024	-0.0186928	-0.716617	-0.126446	-1.26033
ENSG00000166448	TMEM130	1.66118	-0.143725	0.660043	-0.38604	-0.750126	-1.16842
ENSG00000166455	C16orf46	1.56221	-0.481115	0.4264	0.141504	-0.769784	-1.03015
ENSG00000166573	GALR1	1.67042	-0.277949	0.161683	-0.592686	-0.15805	-1.01733
ENSG00000167011	NAT16	1.74837	-0.131108	0.320661	-0.33672	-0.774009	-0.996032
ENSG00000167614	TTYH1	1.75287	0.00931577	0.23384	-0.43593	-0.681791	-1.09313
ENSG00000167851	CD300A	1.32767	-1.20534	0.76292	-0.220654	0.123542	-0.79654
ENSG00000168237	GLYCTK	1.83447	-0.28566	-0.111873	-0.573981	-0.24122	-0.866277
ENSG00000168389	MFSD2A	1.81509	-0.245198	0.344855	-0.402151	-0.82545	-0.801237
ENSG00000168421	RHOH	1.50591	-0.649042	0.868796	-0.480393	-0.367961	-0.880153
ENSG00000168490	PHYHIP	1.64176	-0.476017	0.805631	-0.771508	-0.146043	-1.13656
ENSG00000169884	WNT10B	1.2625	-0.0031008	0.433129	-0.328029	-0.135944	-1.4937
ENSG00000170011	MYRIP	1.91177	-0.206828	-0.141047	-0.463147	-0.603782	-0.709636
ENSG00000170373	CST1	1.76226	-0.788662	0.0508814	-0.20744	-0.196676	-0.810189
ENSG00000170525	PFKFB3	1.55726	-0.884751	0.929	-0.632714	-0.0749001	-0.882192
ENSG00000171224	FAM241B	1.67699	0.300242	0.0862521	-0.333993	-0.767128	-1.25441
ENSG00000171303	KCNK3	1.80993	0.0769255	0.0289671	-0.395342	-0.792828	-0.960546
ENSG00000171435	KSR2	1.82052	-0.223042	0.296667	-0.302042	-0.844605	-0.897768
ENSG00000171462	DLK2	1.8215	-0.251242	0.201427	-0.358453	-0.629458	-0.977894
ENSG00000171722	SPATA46	1.97615	-0.383879	0.0864342	-0.500611	-0.607193	-0.732384
ENSG00000171877	FRMD5	1.55858	-0.221572	0.824912	-0.596281	-0.482631	-1.16903
ENSG00000171956	FOXB1	1.88987	-0.201432	0.199874	-0.545022	-0.650534	-0.857049
ENSG00000172247	C1QTNF4	1.49197	-0.300026	0.816474	-0.266734	-0.683612	-1.13861
ENSG00000172260	NEGR1	1.66649	0.291647	-0.0886242	-0.592556	-0.595439	-0.938228
ENSG00000172346	CSDC2	1.68059	-0.242635	0.2019	-0.74355	0.171936	-1.35703
ENSG00000172575	RASGRP1	1.67443	-0.181841	0.150106	-0.0207239	-0.874301	-0.946861
ENSG00000172733	PURG	1.72977	-0.143926	0.354007	-0.288321	-0.852148	-0.947839
ENSG00000173227	SYT12	1.51612	0.232617	0.0291912	-0.314718	-0.585648	-1.16035
ENSG00000173262	SLC2A14	1.25331	-1.14296	0.603555	0.28851	-0.741832	-0.146261
ENSG00000173805	HAP1	1.82752	-0.343712	0.486849	-0.535004	-0.669673	-0.859026
ENSG00000173825	TIGD3	1.67559	-0.119337	0.0800992	-0.431886	-0.329191	-1.14033
ENSG00000173826	KCNH6	1.78428	0.163629	-0.551081	-0.323999	-0.782943	-0.570203
ENSG00000174721	FGFBP3	1.85302	-0.245806	0.119785	-0.258042	-0.686328	-1.00358
ENSG00000174939	ASPHD1	1.57703	0.449141	0.00167747	-0.29298	-0.884601	-1.13313
ENSG00000174963	ZIC4	1.49686	-0.447647	0.901771	-0.356848	-0.588037	-1.04087
ENSG00000175077	RTP1	1.45327	0.0684212	-0.0118597	-0.187474	-0.56379	-1.01537
ENSG00000175426	PCSK1	1.82329	-0.0664318	-0.270067	-0.493189	-0.497574	-0.751387
ENSG00000175489	LRRC25	1.33608	-0.445657	0.774977	0.371381	-1.27254	-0.760659
ENSG00000175766	EIF4E1B	1.73501	0.184832	-0.0151076	-0.477305	-0.796689	-0.846024
ENSG00000175868	CALCB	1.42661	0.475013	-0.407379	-0.182455	-1.03889	-0.499655
ENSG00000176244	ACBD7	1.66548	-0.494358	0.530181	-0.443237	-0.443237	-0.909711
ENSG00000176383	B3GNT4	1.61263	-0.617665	0.466008	-0.136532	-0.595182	-0.817013
ENSG00000176887	SOX11	1.6182	-0.138747	0.36915	-0.398238	-0.471926	-1.18154
ENSG00000176956	LY6H	1.50462	0.011038	0.60173	-0.436043	-0.63442	-1.19532
ENSG00000177181	RIMKLA	1.73567	-0.224224	0.344645	-0.403738	-0.602924	-1.01769
ENSG00000177359	OVOS2	1.36803	-0.989407	0.346471	0.346471	-0.753664	-0.308371
ENSG00000178031	ADAMTSL1	1.45875	0.574833	0.224775	-0.881073	-0.441022	-1.17342
ENSG00000178445	GLDC	1.5835	0.0860534	0.480729	-0.447391	-0.67375	-1.21194
ENSG00000178531	CTXN1	1.41189	0.224696	0.237207	-0.322945	-0.502173	-1.31917
ENSG00000178602	OTOS	1.68729	-0.280969	-0.226747	-0.199636	-0.508701	-0.7039
ENSG00000178803	ADORA2A-AS1	1.17052	-1.0504	0.71134	0.0319464	-0.431916	-0.338206
ENSG00000178965	ERICH3	1.6734	-0.435689	0.569496	-0.354915	-0.561337	-0.998114
ENSG00000179111	HES7	1.69651	-0.176476	0.326526	-0.248514	-0.817235	-0.932243
ENSG00000179455	MKRN3	1.76546	0.0004157	0.201104	-0.328815	-0.851621	-0.981688
ENSG00000179761	PIPOX	1.48498	-0.58665	0.359579	-0.409413	-0.194405	-0.752264
ENSG00000179869	ABCA13	1.54794	-0.824231	0.95202	-0.57184	-0.370528	-0.660478
ENSG00000180176	TH	1.89782	0.158775	-0.421074	-0.548305	-0.703773	-0.651618
ENSG00000180287	PLD5	1.65509	-0.288974	0.515936	-0.636858	-0.479969	-0.848317
ENSG00000180539	C9orf139	1.33599	0.225787	0.405098	-0.563947	-0.266366	-1.38039
ENSG00000180549	FUT7	1.51694	-0.0957178	0.264133	-0.308962	-0.428912	-1.17527
ENSG00000180878	C11orf42	1.5274	-0.621616	0.80672	-0.374154	-0.374154	-1.01669
ENSG00000181201		1.91303	-0.0329463	-0.0854693	-0.608074	-0.57656	-0.841801
ENSG00000181449	SOX2	1.50237	0.148783	0.570938	-0.468576	-0.691849	-1.22524
ENSG00000181773	GPR3	1.47201	-0.765486	1.07415	-0.546726	-0.312614	-0.870389
ENSG00000182175	RGMA	1.62335	-0.358885	0.503581	-0.801129	-0.0454571	-1.06075
ENSG00000182223	ZAR1	1.68688	-0.338564	0.293027	-0.403902	-0.425681	-0.984675
ENSG00000182732	RGS6	1.5759	0.0912947	0.725743	-0.722612	-0.693609	-1.06038
ENSG00000183023	SLC8A1	1.79801	-0.0328469	0.163516	-0.396186	-0.755768	-0.981132
ENSG00000183134	PTGDR2	1.28864	-0.981818	1.06364	-0.233182	-0.0245454	-1.12909
ENSG00000183150	GPR19	1.56589	-0.0182523	0.60908	-0.46393	-0.675738	-1.15304
ENSG00000183476	SH2D7	1.79961	-0.164172	-0.154303	-0.292459	-0.450351	-1.03587
ENSG00000183734	ASCL2	1.41162	-0.681038	0.614762	0.132773	-0.630175	-0.925666
ENSG00000183833	CFAP91	1.41086	-0.459464	0.78809	0.123624	-0.971937	-0.925532
ENSG00000183914	DNAH2	1.41332	-0.598664	1.1195	-0.0451608	-0.867113	-0.989345
ENSG00000184144	CNTN2	1.54594	0.0214919	0.0327496	-0.190463	-0.486268	-1.22035
ENSG00000184486	POU3F2	1.70441	-0.135227	0.332272	-0.481297	-0.569333	-1.02368
ENSG00000184588	PDE4B	1.06845	0.48334	0.548352	-0.343164	-0.529455	-1.45392
ENSG00000184697	CLDN6	1.33027	0.0190078	0.982794	-0.620197	-0.57838	-1.18373
ENSG00000184811	TRARG1	1.79974	-0.0179908	0.184794	-0.589697	-0.662992	-0.890209
ENSG00000185056	C5orf47	1.49973	-0.425693	0.457433	0.159635	-0.841584	-0.980214
ENSG00000185245	GP1BA	1.57834	-0.710928	0.503607	0.101675	-0.501224	-1.12742
ENSG00000185272	RBM11	1.11681	0.00083158	0.918616	-0.0449052	-1.2798	-0.642532
ENSG00000185686	PRAME	1.73296	0.11581	0.10122	-0.494654	-0.688159	-0.989168
ENSG00000185988	PLK5	1.78729	0.0844623	0.107366	-0.294939	-0.88346	-1.03183
ENSG00000186007	LEMD1	1.49342	-0.201147	0.717146	-0.414178	-0.477119	-1.25178
ENSG00000186008	RPS4XP21	1.0007	-0.270171	-0.222377	-0.231067	-0.218033	-0.15286
ENSG00000186369		1.62359	0.221028	-0.158592	-0.52662	-0.544007	-0.873398
ENSG00000186409	CCDC30	1.55391	-0.292935	0.521747	-0.0331302	-0.814896	-1.07235
ENSG00000186642	PDE2A	1.80587	-0.0944617	-0.0117424	-0.339965	-0.75135	-0.815049
ENSG00000186919	ZACN	1.43718	-0.0747526	-0.590519	-0.0217024	0.128607	-1.36859
ENSG00000186960	LINC01551	1.92885	-0.239652	-0.161707	-0.512869	-0.576866	-0.637581
ENSG00000187122	SLIT1	1.64074	-0.178789	0.735922	-0.443358	-0.780195	-1.05379
ENSG00000187323	DCC	1.8822	-0.248371	0.157809	-0.490469	-0.66816	-0.791413
ENSG00000187730	GABRD	1.34043	-0.208529	0.0143636	0.155435	-0.817955	-0.640206
ENSG00000187772	LIN28B	1.53668	-0.170838	0.425891	0.0104064	-0.988028	-0.943512
ENSG00000187902	SHISA7	1.65895	0.101073	-0.0284685	-0.182792	-0.905973	-0.866547
ENSG00000188107	EYS	1.58111	-0.327178	0.434462	-0.440169	-0.620117	-0.692654
ENSG00000188263	IL17REL	1.62519	-0.127701	-0.0516626	0.304518	-1.02816	-0.980135
ENSG00000188747	NOXA1	1.43551	0.162145	-0.257872	-0.42684	-0.101845	-1.16742
ENSG00000188816	HMX2	1.85013	-0.0453605	-0.473591	-0.489841	-0.541458	-0.557708
ENSG00000189367	KIAA0408	1.43999	-0.452386	0.517165	-0.0669022	-0.610085	-0.931321
ENSG00000189410	SH2D5	1.80191	-0.385796	0.341667	-0.0839054	-0.984256	-0.805605
ENSG00000196218	RYR1	1.83216	-0.0590416	0.256053	-0.34658	-0.868313	-1.00036
ENSG00000196366	C9orf163	1.80261	-0.530758	0.0107405	-0.35354	-0.412613	-0.685003
ENSG00000196421	C20orf204	1.78213	-0.318375	-0.153441	-0.0045507	-0.607171	-0.982605
ENSG00000196460	RFX8	1.09055	-0.757084	0.89582	-0.118565	-0.335933	-0.734441
ENSG00000196890	H2BU1	1.7704	-0.189119	0.122325	-0.429672	-0.393537	-1.13309
ENSG00000196990	FAM163B	1.64479	0.27775	0.170693	-0.603413	-0.512826	-1.24576
ENSG00000197046	SIGLEC15	0.973033	-1.00297	1.1377	-0.367828	-0.414876	-0.0541762
ENSG00000197140	ADAM32	1.64208	-0.292505	0.553369	-0.324883	-0.705324	-0.979188
ENSG00000197181	PIWIL2	1.20615	-0.380046	0.470547	0.695797	-1.13928	-0.980712
ENSG00000197406	DIO3	1.6214	-0.80573	0.503759	-0.462184	-0.196717	-0.71278
ENSG00000198010	DLGAP2	1.86221	-0.113194	-0.210851	-0.113194	-0.942561	-0.713498
ENSG00000198237		1.73091	-0.229357	0.0106337	-0.350361	-0.241458	-1.22361
ENSG00000198435	NRARP	1.29258	0.177941	0.63563	-0.556909	-0.347915	-1.38989
ENSG00000198576	ARC	1.81458	-0.173882	-0.467633	-0.752079	0.00422924	-0.722837
ENSG00000198597	ZNF536	1.79381	0.196762	-0.0481442	-0.589884	-0.681033	-0.911392
ENSG00000198626	RYR2	1.78628	0.0448674	0.194425	-0.577668	-0.821635	-0.770224
ENSG00000198929	NOS1AP	1.75216	-0.373622	0.537823	-0.450039	-0.652891	-0.905298
ENSG00000199036	MIR219A1	1.46829	-0.504933	0.420778	-0.0847092	-0.377039	-1.08959
ENSG00000199347	RNU5E-1	1.76161	-0.489432	0.042065	-0.433156	-0.151775	-0.9584
ENSG00000199453	SNORD115-12	1.1404	0.345733	0.175447	0.175447	-1.38551	-0.54354
ENSG00000201969	SNORD115-20	1.04513	0.321967	0.0191045	0.544478	-1.38395	-0.722599
ENSG00000203288	TDRKH-AS1	1.83205	-0.225248	0.339061	-0.354179	-0.802636	-0.939041
ENSG00000204347	BTBD17	1.61299	0.0676977	0.258578	-0.379227	-0.569907	-1.23398
ENSG00000204421	LY6G6C	1.67899	-0.296292	0.636479	-0.411517	-0.691348	-1.00959
ENSG00000204869	IGFL4	1.75639	-0.263395	0.479513	-0.165888	-0.904153	-1.04345
ENSG00000204950	LRRC10B	1.46407	-0.216427	0.452658	-0.0357944	-0.740059	-1.08171
ENSG00000205336	ADGRG1	1.55069	-0.334855	0.823015	-0.536568	-0.414697	-1.17577
ENSG00000205744	DENND1C	1.85421	0.269976	-0.257168	-0.460562	-0.821632	-0.865483
ENSG00000205869	KRTAP5-1	1.54545	-0.0693026	0.337273	-0.200978	-0.824701	-0.937896
ENSG00000205927	OLIG2	1.6617	-0.580927	0.446584	-0.407751	-0.494339	-0.684833
ENSG00000212125	TAS2R15P	1.61497	-0.38653	-0.0511439	-0.418987	-0.440625	-0.440625
ENSG00000212694	LINC01089	1.46224	-0.155711	0.0236284	-0.331151	0.0899059	-1.44401
ENSG00000213540		1.64318	-0.474216	0.00254955	-0.39008	-0.642486	-0.184417
ENSG00000213994		1.74469	-0.63878	0.341433	-0.329239	-0.422101	-0.814187
ENSG00000214357	NEURL1B	1.22871	0.702166	0.403055	-0.988373	-0.181621	-1.41757
ENSG00000214439		1.78233	-0.270877	0.0657591	-0.345994	-0.729926	-0.646463
ENSG00000214770		1.66942	-0.434636	0.186859	-0.309643	-0.486717	-0.771424
ENSG00000214872	SMTNL1	1.63207	-0.360875	0.490534	-0.141244	-0.905886	-0.789292
ENSG00000215788	TNFRSF25	1.45628	-0.17421	0.189603	-0.0868357	-0.282317	-1.40683
ENSG00000217801	LOC100288175	1.43166	-0.952726	1.13053	-0.259996	-0.581388	-0.647259
ENSG00000219881		1.744	-0.285216	0.0409943	-0.630614	-0.616223	-0.323593
ENSG00000220008	LINGO3	1.77879	-0.0638367	-0.164152	-0.19055	-0.755481	-0.861075
ENSG00000221866	PLXNA4	1.5016	0.572715	-0.251323	-0.817495	-0.198049	-1.16037
ENSG00000222012	LOC105375614	1.73749	-0.210104	0.317911	-0.210104	-0.885271	-0.893927
ENSG00000223947		1.62497	-0.780739	0.322956	-0.237514	-0.108175	-0.987682
ENSG00000224243	SOX1-OT	1.63858	-0.0406863	0.366061	-0.239597	-0.84398	-1.05182
ENSG00000224420	ADM5	1.7253	-0.148027	-0.205991	-0.345635	-0.0926962	-1.3126
ENSG00000224557	HLA-DPB2	1.54613	-0.411407	0.329976	0.199006	-0.965691	-0.820688
ENSG00000225213		1.30778	-0.799482	-0.0221369	0.352487	-0.715191	-0.171986
ENSG00000225527		0.885619	-0.904767	1.02604	-0.193879	-0.852109	0.39414
ENSG00000225783	MIAT	1.86883	-0.103481	0.0569991	-0.373674	-0.761045	-0.89784
ENSG00000225808		1.24067	-0.82036	0.54128	0.36798	-1.06174	-0.176676
ENSG00000226287	TMEM191A	1.78471	-0.0307429	0.0523169	-0.222077	-0.849476	-0.9622
ENSG00000226321	CROCC2	1.4401	-0.0818068	-0.586345	0.614871	-0.936066	-0.796454
ENSG00000227028	SLC8A1-AS1	1.88451	-0.179586	-0.204913	-0.344207	-0.673449	-0.711438
ENSG00000227487		1.61518	-0.400774	-0.408159	-0.134934	-0.422928	-0.467234
ENSG00000227640	SOX21-AS1	1.76185	-0.245105	0.362005	-0.531813	-0.585111	-0.895099
ENSG00000230002	ALMS1-IT1	1.14818	-0.80966	1.05349	0.27675	-1.11293	-0.38994
ENSG00000230454		1.42058	-0.0813559	-0.0850754	-0.454051	0.0904856	-1.21581
ENSG00000230461	PROX1-AS1	1.75295	-0.374332	0.513789	-0.521767	-0.563892	-0.904397
ENSG00000230736	LOC339666	1.59631	-1.01252	-0.176354	-0.0592915	-0.385394	-0.0091218
ENSG00000231079		1.63426	-0.346349	0.620828	-0.295887	-0.762655	-0.926655
ENSG00000232374	GPR79	1.36727	-0.745083	-0.0972961	-0.0972961	-0.60426	0.203127
ENSG00000233367		0.802256	-1.05361	0.562383	0.0826358	-0.144613	-0.144613
ENSG00000233579	KRT8P15	1.56399	-0.591579	0.181171	-0.327217	-0.591579	-0.252654
ENSG00000233806	LINC01237	1.35265	-0.820025	0.396512	0.0466049	-0.795612	-0.108005
ENSG00000234409	CCDC188	1.6681	0.104778	-0.203698	-0.291489	-0.540365	-1.051
ENSG00000234537		1.46696	-0.447224	-0.0665132	0.369496	-0.932151	-0.542933
ENSG00000235010		1.62139	-0.0745467	0.316823	-0.0465917	-1.00638	-0.975319
ENSG00000235034	C19orf81	1.66906	0.695691	-0.706905	-0.621144	-0.699723	-0.684937
ENSG00000235280		1.80997	-0.166925	0.0609214	-0.34116	-0.770046	-0.770046
ENSG00000235413		1.69377	-0.236815	-0.267669	-0.540947	-0.580616	-0.179514
ENSG00000235527	HIPK1-AS1	1.49827	-0.491461	0.346981	-0.30375	-0.491461	-0.629116
ENSG00000235688		1.87397	-0.0705259	0.107468	-0.352629	-0.866461	-0.886611
ENSG00000236065		0.790107	-1.10726	0.953321	-0.0361669	0.0556413	-0.556413
ENSG00000236107	SCN1A-AS1	1.77331	-0.255182	0.0152843	-0.441584	-0.562198	-0.701086
ENSG00000236255		1.26941	-0.689595	0.860597	0.421061	-0.947172	-0.932206
ENSG00000237159	CNTFR-AS1	1.75727	-0.122033	-0.0056949	-0.0146439	-1.1288	-0.650027
ENSG00000237515	SHISA9	1.41537	-0.3541	0.0849702	-0.246688	-0.331487	-0.729099
ENSG00000237517		1.46001	0.0727737	-0.42709	-0.151931	-1.0211	-0.0525824
ENSG00000237750	KCNH7-AS1	1.72689	-0.123414	0.0609453	-0.404982	-0.626213	-0.823981
ENSG00000237872	POU5F1P4	0.881489	-0.969387	0.688114	-0.306387	-0.444512	0.430281
ENSG00000239389	PCDHA13	1.76317	-0.0448264	-0.23354	-0.495304	-0.787506	-0.347174
ENSG00000240694	PNMA2	1.71942	-0.0233644	0.427245	-0.388593	-0.811086	-1.08908
ENSG00000241484	ARHGAP8	1.62075	-0.651582	0.427953	0.0704674	-0.763075	-0.7967
ENSG00000241738		1.37293	-0.99397	0.589852	-0.393413	-0.322759	-0.140237
ENSG00000242512	LINC01206	1.79297	-0.152577	-0.333493	-0.586775	-0.286176	-0.689758
ENSG00000242686	PDE6B-AS1	1.65792	-0.246081	0.296826	-0.32637	-0.704876	-0.804281
ENSG00000242797		1.47431	-0.39543	0.604359	-0.382446	-0.655116	-0.659444
ENSG00000242808	SOX2-OT	1.65372	-0.0264056	0.246699	-0.378703	-0.632552	-1.06811
ENSG00000242866	STRC	1.65135	-0.494637	0.215059	0.215059	-0.900177	-0.843852
ENSG00000242950	ERVW-1	1.59304	-0.741799	0.660728	0.0972851	-0.711397	-0.976904
ENSG00000243323	PTPRVP	1.15457	-0.653092	0.077749	0.454832	-0.758053	-0.342095
ENSG00000244342	LINC00698	1.73832	-0.239769	0.419596	-0.541193	-0.691905	-0.77354
ENSG00000246640	PICART1	1.67617	-0.559451	0.0655607	-0.174828	-0.619549	-0.495347
ENSG00000246763	RGMB-AS1	1.45526	0.0582105	0.708228	-0.625763	-0.586956	-1.10923
ENSG00000247199	LOC102546294	1.56466	-0.300498	-0.013816	0.10362	-0.683891	-0.898039
ENSG00000248115		1.17663	-1.17466	0.35691	-0.398091	-0.37652	0.673291
ENSG00000248152		1.81857	-0.360113	-0.0180057	-0.765241	-0.270085	-0.546172
ENSG00000248423		1.11633	-0.820834	-0.0218889	-0.164167	0.229833	-0.459667
ENSG00000249487	LINC01586	1.78114	-0.279363	-0.0484444	-0.368177	-0.492518	-0.80633
ENSG00000249626		1.30927	-0.504858	0.350783	0.507102	-0.912111	-0.883315
ENSG00000249661		1.62289	-0.519909	0.484451	-0.161557	-0.783188	-0.695429
ENSG00000249684		1.66798	-0.244723	-0.732739	0.0386405	-0.669769	-0.323435
ENSG00000250120	PCDHA10	1.52941	-0.320338	0.623848	0.00127118	-1.05145	-0.835711
ENSG00000250410		1.78872	-0.192227	0.171318	-0.592867	-0.659641	-0.629964
ENSG00000250656		1.36205	-0.676214	0.00320861	0.144387	-0.490917	-0.455622
ENSG00000250910	LOC102724776	1.76122	-0.452395	-0.177838	-0.0405596	-0.795592	-0.452395
ENSG00000250988	SNHG21	1.49727	-0.53855	0.311236	0.195078	-0.905364	-0.642481
ENSG00000251161		1.62211	-0.271364	0.441473	-0.315917	-0.449574	-1.22181
ENSG00000251196		0.786529	-0.18054	-0.0251187	0.75199	-1.33757	-0.0020932
ENSG00000252690		0.999328	-1.11107	0.458201	0.141255	-0.183421	-0.252994
ENSG00000253697		1.29715	-1.14273	0.0411793	0.061769	-0.339729	0.123538
ENSG00000253888		1.64067	-0.427258	0.46795	-0.34669	-0.709249	-0.677917
ENSG00000254208		1.57964	-0.445155	0.594793	-0.17656	-0.69309	-0.947912
ENSG00000254266	PKIA-AS1	1.86375	-0.0043102	-0.0454012	-0.459471	-0.668087	-0.930437
ENSG00000254440	PBOV1	1.71021	-0.552031	0.400493	-0.194835	-0.849695	-0.552031
ENSG00000254477		1.73807	-0.450471	0.334099	-0.388531	-0.594997	-0.739523
ENSG00000254556		1.37954	-0.546213	0.720503	-0.41783	-1.00839	0.0700273
ENSG00000254585	MAGEL2	1.8409	-0.165213	-0.0673726	-0.338898	-0.610818	-0.90059
ENSG00000254815	LMNTD2-AS1	1.58605	-0.0565278	0.131571	-0.175138	-0.530969	-1.22945
ENSG00000254872	LINC02688	1.65395	-0.432315	0.41651	-0.156191	-0.892522	-0.647078
ENSG00000254995	STX16-NPEPL1	1.78001	-0.172233	0.0540497	-0.496128	-0.451759	-0.933904
ENSG00000255201		1.04638	-0.835716	0.458902	-0.5311	0.524177	-0.730551
ENSG00000255618		1.5249	0.182046	0.0642515	-0.218455	-0.595398	-1.25505
ENSG00000255622	PCDHB17P	1.52751	-0.323091	0.244708	0.129045	-0.817287	-0.932949
ENSG00000256069	A2MP1	1.11673	-0.702399	0.438629	0.0995806	-0.761081	-0.109064
ENSG00000256274	TAS2R64P	1.18319	-0.66362	0.917279	-0.401351	-0.794754	-0.0152328
ENSG00000257056	LINC02282	1.88108	-0.12197	-0.266844	-0.452662	-0.613284	-0.657376
ENSG00000257126		1.9428	-0.140227	-0.232513	-0.57529	-0.562106	-0.654392
ENSG00000258162		1.45725	-0.174521	0.593373	-0.150525	-0.726445	-1.13439
ENSG00000258458		1.45987	-0.736965	-0.324414	0.191273	-0.334728	-0.44818
ENSG00000258947	TUBB3	1.73641	-0.16685	0.0873825	-0.398445	-0.4176	-1.09207
ENSG00000259158	ADAM20P1	1.36999	-0.505887	0.39188	0.615448	-1.20803	-0.753908
ENSG00000259404		1.49612	0.0547755	0.602173	-0.831299	-0.476869	-0.925814
ENSG00000259448		1.5972	-0.222518	0.108123	-0.122612	-0.650686	-0.909966
ENSG00000260403		1.60857	-0.71058	-0.0234257	-0.0878465	-0.0663729	-0.968263
ENSG00000260412		1.77211	-0.21214	-0.202231	-0.360772	-0.739786	-0.410316
ENSG00000260455		1.16423	-0.890152	0.452757	0.417183	-0.303185	-0.970193
ENSG00000260551	PWRN2	1.60498	-0.498159	0.119277	0.138572	-0.999826	-0.446706
ENSG00000260572		1.45446	-0.242958	-0.291112	0.00984964	-0.0804387	-1.23011
ENSG00000260708		1.49997	-0.555872	1.11174	-0.209996	-0.915866	-0.869396
ENSG00000260823		1.30719	-0.839607	0.554317	-0.481809	-0.12401	-0.369996
ENSG00000260978		1.86855	0.00977567	-0.0260685	-0.497163	-0.620057	-0.988739
ENSG00000261520	DLGAP1-AS5	1.54329	-0.76676	-0.283262	-0.202679	-0.739899	0.504662
ENSG00000261790		1.77711	-0.0767771	0.396994	-0.653542	-0.632943	-0.94879
ENSG00000261916		1.24771	-0.807058	0.237886	0.00957932	-0.543626	-0.113355
ENSG00000262585	LINC01979	1.76351	-0.277342	0.248652	-0.298382	-0.656058	-0.957627
ENSG00000264513		1.52087	-0.7319	-0.0548365	-0.381058	-0.0671468	-0.399523
ENSG00000266019	MIR3609	1.56657	0.280054	-0.354827	-0.513966	-0.116956	-1.26611
ENSG00000266256	LINC00908	1.6384	-0.272701	-0.0791711	-0.296892	-0.611377	-0.53074
ENSG00000267481		1.61418	-0.510944	0.458409	-0.706679	-0.692698	-0.0635502
ENSG00000267522	LINC01864	1.91213	0.107486	-0.527249	-0.452575	-0.589479	-0.776165
ENSG00000267577		1.82973	-0.0764093	-0.336565	-0.511669	-0.586714	-0.536684
ENSG00000267632		1.57722	-0.456737	0.234753	0.0699839	-0.740356	-0.834895
ENSG00000267649		1.88267	-0.0763245	-0.356181	-0.0703701	-0.719399	-0.999256
ENSG00000267909	CCDC177	1.68683	0.10226	-0.0735572	-0.31748	-0.63062	-1.04777
ENSG00000267940		1.3777	-0.71967	0.867809	-0.420046	-0.309659	-0.772236
ENSG00000268496		1.7333	-0.380907	0.413523	-0.496227	-0.457787	-0.944695
ENSG00000269533		1.56999	-0.722002	0.699389	-0.402189	-0.562095	-0.544328
ENSG00000269891	ARHGAP19-SLIT1	1.82758	-0.311979	0.252922	-0.333163	-0.608552	-1.01811
ENSG00000270171		1.53907	-0.343998	0.048679	0.128999	-0.683129	-0.903266
ENSG00000270257		1.64484	-0.939911	0.215874	-0.68774	-0.24644	0.0897883
ENSG00000270814		1.78637	-0.0787104	-0.0678606	0.00266313	-1.02264	-0.849046
ENSG00000271959		1.62586	-0.551138	0.321497	-0.620031	0	-0.92775
ENSG00000272108		1.20519	-0.23411	0.920619	0.224489	-1.10898	-1.03607
ENSG00000272163		1.53638	-0.0921173	0.311992	-0.0649756	-0.93351	-0.906368
ENSG00000272205		1.22689	-1.01784	0.633767	0.460394	-0.77147	-0.497723
ENSG00000272256		1.19333	-0.555291	0.937825	0.235182	-0.794829	-1.04235
ENSG00000272372		1.68678	-0.0356452	0.207082	-0.259701	-0.987883	-0.745155
ENSG00000272449		1.78601	-0.0554783	-0.212504	-0.0768909	-0.847747	-0.862022
ENSG00000272677	HNRNPD-DT	1.57305	-0.563833	0.426429	-0.390103	-0.494341	-0.592789
ENSG00000272735		1.42208	-0.545894	-0.159028	-0.25995	-0.344051	-0.203882
ENSG00000272983		1.20338	-0.604893	0.480593	0.600623	-1.03543	-0.698829
ENSG00000273045	C2orf15	1.73743	-0.0914437	-0.0685828	-0.468649	-0.377205	-0.998261
ENSG00000273274	ZBTB8B	1.76914	-0.180284	0.370151	-0.224353	-0.926223	-0.954522
ENSG00000273308		1.18782	-0.626903	0.92569	0.159475	-0.657148	-1.01001
ENSG00000273443		1.32038	-0.631487	0.612351	-0.243984	-0.258336	-0.861119
ENSG00000274727	IQSEC3P3	1.87246	-0.164233	-0.152726	-0.2793	-0.659022	-0.873814
ENSG00000275339		0.904744	-0.920397	0.778476	0.0438284	-0.713777	0.135659
ENSG00000275427	LOC286083	1.75679	-0.458133	-0.119459	-0.193967	-0.945822	-0.0923655
ENSG00000275437		1.72614	-0.484513	0.102806	-0.298468	-0.407906	-0.816475
ENSG00000276115		1.3698	-0.450318	0.693978	0.0104725	-0.84199	-0.811271
ENSG00000276216		1.77277	-0.139828	0.034045	-0.527697	-0.594571	-0.714944
ENSG00000276386		1.50888	-0.572652	0.820234	-0.783144	0.00425237	-1.03002
ENSG00000276517		1.261	-0.739818	1.1012	-0.193059	-0.735856	-0.557565
ENSG00000276698		1.49923	-0.69438	0.483962	-0.331408	-0.394534	-0.589171
ENSG00000277475		1.21222	0.23653	0.381077	-0.486201	-0.197109	-1.40166
ENSG00000277531		1.65727	-0.0879573	0.0345149	-0.161441	-0.816667	-0.82279
ENSG00000277586	NEFL	1.60848	-0.0111121	0.600726	-0.633739	-0.555132	-1.14539
ENSG00000277938		1.73763	-0.455063	0.32873	-0.152125	-0.873407	-0.671448
